# Supplementary material for: Benchmarking the Fluxional Processes of Organometallic Piano-Stool Complexes
Source: MDPI journal article supplement (doi:10.3390/molecules26082310), 2021-04-16
Supplement: s1 [file s1]

## Supporting Information

### Benchmarking the Fluxional Processes of Organometallic Piano Stool Complexes

Nathan C. Frey, Eric Van Dornshuld, Charles Edwin Webster\*

*Department of Chemistry, Mississippi State University, Mississippi State, Mississippi 39762, United States*

#### Contents

|                                                                                                                                                                                                                                                                                                |    |
|------------------------------------------------------------------------------------------------------------------------------------------------------------------------------------------------------------------------------------------------------------------------------------------------|----|
| Table S1. Computed bond lengths from Cr to COT C atoms (in Å). .....                                                                                                                                                                                                                           | 3  |
| Table S2. $\Delta G/\Delta G^\ddagger$ values for fluxional transition states of (COT)Cr(CO) <sub>3</sub> (in kcal mol <sup>-1</sup> ).5                                                                                                                                                       |    |
| Table S3. $\Delta E_e/\Delta E_e^\ddagger$ values for fluxional transition states of (COT)Cr(CO) <sub>3</sub> (in kcal mol <sup>-1</sup> ). .....                                                                                                                                              | 5  |
| Table S4. Raw Energies Utilized in Assessment of ccCA-TM Energies Using P Extrapolation (in a.u.). .....                                                                                                                                                                                       | 6  |
| Table S5. $\Delta\Delta E_e/\Delta\Delta E_e^\ddagger$ values for fluxional transition states of (COT)Cr(CO) <sub>3</sub> and statistical parameters ( $R^2$ = least squared regression, m = slope, b = y-intercept) in kcal mol <sup>-1</sup> (relative to ccCA-TM). .....                    | 7  |
| Figure S1. Plot of $\Delta E_{e,DFT}$ vs. $\Delta E_{e,ccCA-TM}$ (in kcal mol <sup>-1</sup> ) for (COT)Cr(CO) <sub>3</sub> computed at each level of theory. ....                                                                                                                              | 8  |
| Table S6. Experimental and computed bond lengths and angles for (TMCOT)Cr(CO) <sub>3</sub> ; computed bond lengths and angles for (TMCOT)Mo(CO) <sub>3</sub> and (TMCOT)W(CO) <sub>3</sub> (PBE0/BS1 level of theory). (M = Cr, Mo, W) .....                                                   | 9  |
| Figure S2. Top-down view of the reported crystal structure of (TMCOT)Cr(CO) <sub>3</sub> with atom labels. Hydrogens omitted for clarity. <sup>2</sup> .....                                                                                                                                   | 9  |
| Figure S3. 2D and 3D representation of <b>TS-G</b> .....                                                                                                                                                                                                                                       | 10 |
| Figure S4. 2D and 3D representation of <b>TS-6</b> and <b>2</b> . .....                                                                                                                                                                                                                        | 10 |
| Table S7. $\Delta G^\ddagger_{\text{solution}}$ of (TMCOT)M(CO) <sub>3</sub> complexes with implicit chloroform solvation model at the SMD-PBE0//PBE0/BS1 level of theory (gas phase $\Delta G^\ddagger$ in parentheses). All relative free energies reported in kcal mol <sup>-1</sup> . .... | 10 |

Figure S5. Simulated (colored) gas-phase and experimental (black)  $^1\text{H}$ -NMR for the lowest energy structure of  $(\text{TMCOT})\text{Mo}(\text{CO})_3$  at the GIAO-PBEPBE/BS6//PBEPBE/BS1 level of theory. Results given for low-temperature limit (**A**,  $-10^\circ\text{C}$ ), low temperature (**B**,  $40^\circ\text{C}$ ), and high-temperature limit (**C**,  $>80^\circ\text{C}$ ). Experimental  $^1\text{H}$ -NMR for high temperature limit not reported due to thermal decomposition of  $(\text{TMCOT})\text{Mo}(\text{CO})_3$  above  $80^\circ\text{C}$ . Experimental spectra adapted in part with permission from Cotton, F. A.; Faller, J. W.; Musco, A. Stereochemically Nonrigid Organometallic Compounds. II. 1,3,5,7-Tetramethylcyclo-Octatetraenemolybdenum Tricarbonyl. *J. Am. Chem. Soc.* **1966**, 88 (19), 4506–4507. Copyright (1966) American Chemical Society. ....11

Figure S6. Simulated gas-phase (colored, GIAO-PBEPBE/BS6//PBEPBE/auto/BS1) and experimental  $^1\text{H}$ -NMR for  $(\text{TMCOT})\text{Cr}(\text{CO})_3$  in three temperature regimes (A, B, C) with corresponding fluxional processes.  $(\text{CO})_3$  omitted for clarity. All chemical shifts are relative to tetramethylsilane (TMS). Experimental spectra adapted in part with permission from Cotton, F. A.; Faller, J. W.; Musco, A., Stereochemically nonrigid organometallic molecules. XII. Temperature dependence of the proton nuclear magnetic resonance spectra of the 1,3,5,7-tetramethylcyclooctatetraene tricarbonyl compounds of chromium, molybdenum, and tungsten *J. Am. Chem. Soc.*, **1968**, 90 (6), 1438-1444. Copyright (1968) American Chemical Society.....12

Table S8. Experimental and computed  $^1\text{H}$ -NMR chemical shifts in  $(\text{TMCOT})\text{Cr}(\text{CO})_3$  and  $(\text{TMCOT})\text{Mo}(\text{CO})_3$  at the GIAO-PBEPBE/BS6//PBEPBE/auto/BS1 level of theory (measured in ppm; relative to TMS). ....13

Figure S7. 2D-representation of  $(\text{TMCOT})\text{M}(\text{CO})_3$  ( $\text{M} = \text{Cr}, \text{Mo}$ ) with hydrogens labelled.  $(\text{CO})_3$  omitted for clarity. ....13

Table S9. Computed chemical shifts for  $^{13}\text{C}$ -NMR in  $(\text{TMCOT})\text{Cr}(\text{CO})_3$  at the GIAO-PBEPBE/BS6//PBEPBE/auto/BS1 (relative to TMS). See Figure S1 for appropriate atom labelling.....14

Table S10. Basis Sets Used in Study .....14

Molecular Coordinates for  $(\text{COT})\text{Cr}(\text{CO})_3$  ( $\text{\AA}$ ) .....15

Molecular Coordinates for  $(\text{TMCOT})\text{Cr}(\text{CO})_3$  ( $\text{\AA}$ ) .....33

Molecular Coordinates for  $(\text{TMCOT})\text{Mo}(\text{CO})_3$  ( $\text{\AA}$ ).....41

Molecular Coordinates for  $(\text{TMCOT})\text{W}(\text{CO})_3$  ( $\text{\AA}$ ).....49

**References** .....58

Table S1. Computed bond lengths from Cr to COT C atoms (in Å).

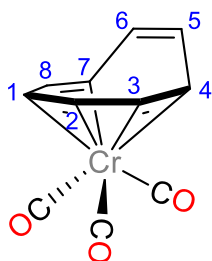

| I (minimum)    | Level of Theory   | C <sub>1</sub> | C <sub>2</sub> | C <sub>3</sub> | C <sub>4</sub> | C <sub>5</sub> | C <sub>6</sub> | C <sub>7</sub> | C <sub>8</sub> |
|----------------|-------------------|----------------|----------------|----------------|----------------|----------------|----------------|----------------|----------------|
|                | <b>PBE0/BS1</b>   | 2.211          | 2.211          | 2.176          | 2.305          | –              | –              | 2.305          | 2.176          |
|                | <b>PBE0/BS3</b>   | 2.208          | 2.208          | 2.177          | 2.309          | –              | –              | 2.309          | 2.177          |
|                | <b>PBEPBE/BS1</b> | 2.234          | 2.234          | 2.197          | 2.342          | –              | –              | 2.342          | 2.197          |
|                | <b>PBEPBE/BS2</b> | 2.231          | 2.231          | 2.198          | 2.343          | –              | –              | 2.343          | 2.198          |
|                | <b>PBEPBE/BS3</b> | 2.230          | 2.230          | 2.196          | 2.339          | –              | –              | 2.339          | 2.196          |
|                | <b>B3LYP/BS1</b>  | 2.260          | 2.260          | 2.235          | 2.410          | –              | –              | 2.410          | 2.235          |
|                | <b>B3LYP/BS3</b>  | 2.254          | 2.254          | 2.235          | 2.416          | –              | –              | 2.416          | 2.235          |
|                | <b>B3LYP/BS4</b>  | 2.260          | 2.260          | 2.235          | 2.408          | –              | –              | 2.408          | 2.235          |
|                | <b>B3LYP/BS5</b>  | 2.259          | 2.259          | 2.234          | 2.407          | –              | –              | 2.407          | 2.234          |
|                | <b>B97-1/BS2</b>  | 2.249          | 2.249          | 2.224          | 2.384          | –              | –              | 2.384          | 2.224          |
|                | <b>B97-1/BS3</b>  | 2.242          | 2.242          | 2.215          | 2.369          | –              | –              | 2.369          | 2.215          |
| TS-1 (CO Rot.) | Level of Theory   | C <sub>1</sub> | C <sub>2</sub> | C <sub>3</sub> | C <sub>4</sub> | C <sub>5</sub> | C <sub>6</sub> | C <sub>7</sub> | C <sub>8</sub> |
|                | <b>PBE0/BS1</b>   | 2.213          | 2.213          | 2.187          | 2.265          | –              | –              | 2.265          | 2.187          |
|                | <b>PBE0/BS3</b>   | 2.209          | 2.209          | 2.186          | 2.264          | –              | –              | 2.264          | 2.186          |
|                | <b>PBEPBE/BS1</b> | 2.237          | 2.237          | 2.211          | 2.303          | –              | –              | 2.303          | 2.211          |
|                | <b>PBEPBE/BS2</b> | 2.232          | 2.232          | 2.208          | 2.301          | –              | –              | 2.301          | 2.208          |
|                | <b>PBEPBE/BS3</b> | 2.230          | 2.230          | 2.196          | 2.339          | –              | –              | 2.339          | 2.196          |
|                | <b>B3LYP/BS1</b>  | 2.268          | 2.268          | 2.244          | 2.342          | –              | –              | 2.342          | 2.244          |
|                | <b>B3LYP/BS3</b>  | 2.262          | 2.262          | 2.240          | 2.338          | –              | –              | 2.338          | 2.240          |
|                | <b>B3LYP/BS4</b>  | 2.269          | 2.269          | 2.242          | 2.337          | –              | –              | 2.337          | 2.242          |
|                | <b>B3LYP/BS5</b>  | 2.267          | 2.267          | 2.242          | 2.336          | –              | –              | 2.336          | 2.242          |
|                | <b>B97-1/BS2</b>  | 2.253          | 2.253          | 2.229          | 2.312          | –              | –              | 2.312          | 2.229          |
|                | <b>B97-1/BS3</b>  | 2.244          | 2.244          | 2.220          | 2.301          | –              | –              | 2.301          | 2.220          |
| TS-2 (1,3)     | Level of Theory   | C <sub>1</sub> | C <sub>2</sub> | C <sub>3</sub> | C <sub>4</sub> | C <sub>5</sub> | C <sub>6</sub> | C <sub>7</sub> | C <sub>8</sub> |
|                | <b>PBE0/BS1</b>   | 2.145          | 2.145          | 2.219          | –              | –              | –              | –              | 2.219          |
|                | <b>PBE0/BS3</b>   | 2.147          | 2.147          | 2.228          | –              | –              | –              | –              | 2.228          |
|                | <b>PBEPBE/BS1</b> | 2.167          | 2.167          | 2.263          | –              | –              | –              | –              | 2.263          |
|                | <b>PBEPBE/BS2</b> | 2.167          | 2.167          | 2.265          | –              | –              | –              | –              | 2.265          |
|                | <b>PBEPBE/BS3</b> | 2.168          | 2.168          | 2.268          | –              | –              | –              | –              | 2.268          |
|                | <b>B3LYP/BS1</b>  | 2.185          | 2.185          | 2.285          | –              | –              | –              | –              | 2.285          |
|                | <b>B3LYP/BS3</b>  | 2.184          | 2.184          | 2.290          | –              | –              | –              | –              | 2.290          |
|                | <b>B3LYP/BS4</b>  | 2.186          | 2.186          | 2.279          | –              | –              | –              | –              | 2.279          |

|                   |                        |                      |                      |                      |                      |                      |                      |                      |                      |
|-------------------|------------------------|----------------------|----------------------|----------------------|----------------------|----------------------|----------------------|----------------------|----------------------|
|                   | <b>B3LYP/BS5</b>       | 2.183                | 2.183                | 2.278                | –                    | –                    | –                    | –                    | 2.278                |
|                   | <b>B97-1/BS2</b>       | 2.179                | 2.179                | 2.269                | –                    | –                    | –                    | –                    | 2.269                |
|                   | <b>B97-1/BS3</b>       | 2.174                | 2.174                | 2.265                | –                    | –                    | –                    | –                    | 2.265                |
| <b>TS-3 (1,2)</b> | <b>Level of Theory</b> | <b>C<sub>1</sub></b> | <b>C<sub>2</sub></b> | <b>C<sub>3</sub></b> | <b>C<sub>4</sub></b> | <b>C<sub>5</sub></b> | <b>C<sub>6</sub></b> | <b>C<sub>7</sub></b> | <b>C<sub>8</sub></b> |
|                   | <b>PBE0/BS1</b>        | 2.173                | 2.128                | 2.367                | –                    | –                    | –                    | 2.367                | 2.128                |
|                   | <b>PBE0/BS3</b>        | 2.173                | 2.140                | 2.380                | –                    | –                    | –                    | 2.380                | 2.140                |
|                   | <b>PBEPBE/BS1</b>      | 2.192                | 2.158                | 2.409                | –                    | –                    | –                    | 2.409                | 2.158                |
|                   | <b>PBEPBE/BS2</b>      | 2.193                | 2.166                | 2.411                | –                    | –                    | –                    | 2.411                | 2.166                |
|                   | <b>PBEPBE/BS3</b>      | 2.193                | 2.167                | 2.413                | –                    | –                    | –                    | 2.413                | 2.167                |
|                   | <b>B3LYP/BS1</b>       | 2.206                | 2.176                | 2.442                | –                    | –                    | –                    | 2.442                | 2.176                |
|                   | <b>B3LYP/BS3</b>       | 2.204                | 2.185                | 2.453                | –                    | –                    | –                    | 2.453                | 2.185                |
|                   | <b>B3LYP/BS4</b>       | 2.207                | 2.180                | 2.440                | –                    | –                    | –                    | 2.440                | 2.180                |
|                   | <b>B3LYP/BS5</b>       | 2.207                | 2.179                | 2.438                | –                    | –                    | –                    | 2.438                | 2.179                |
|                   | <b>B97-1/BS2</b>       | 2.203                | 2.174                | 2.429                | –                    | –                    | –                    | 2.429                | 2.174                |
|                   | <b>B97-1/BS3</b>       | 2.197                | 2.169                | 2.427                | –                    | –                    | –                    | 2.427                | 2.169                |
| <b>TS-4 (1,5)</b> | <b>Level of Theory</b> | <b>C<sub>1</sub></b> | <b>C<sub>2</sub></b> | <b>C<sub>3</sub></b> | <b>C<sub>4</sub></b> | <b>C<sub>5</sub></b> | <b>C<sub>6</sub></b> | <b>C<sub>7</sub></b> | <b>C<sub>8</sub></b> |
|                   | <b>PBE0/BS1</b>        | 2.228                | 2.228                | –                    | –                    | 2.620                | 2.620                | –                    | –                    |
|                   | <b>PBE0/BS3</b>        | 2.236                | 2.236                | –                    | –                    | 2.609                | 2.609                | –                    | –                    |
|                   | <b>PBEPBE/BS1</b>      | 2.254                | 2.254                | –                    | –                    | 2.630                | 2.630                | –                    | –                    |
|                   | <b>PBEPBE/BS2</b>      | 2.263                | 2.263                | –                    | –                    | 2.611                | 2.611                | –                    | –                    |
|                   | <b>PBEPBE/BS3</b>      | 2.264                | 2.264                | –                    | –                    | 2.606                | 2.606                | –                    | –                    |
|                   | <b>B3LYP/BS1</b>       | 2.288                | 2.288                | –                    | –                    | 2.706                | 2.706                | –                    | –                    |
|                   | <b>B3LYP/BS3</b>       | 2.297                | 2.297                | –                    | –                    | 2.707                | 2.707                | –                    | –                    |
|                   | <b>B3LYP/BS4</b>       | 2.295                | 2.295                | –                    | –                    | 2.697                | 2.697                | –                    | –                    |
|                   | <b>B3LYP/BS5</b>       | 2.294                | 2.294                | –                    | –                    | 2.695                | 2.695                | –                    | –                    |
|                   | <b>B97-1/BS2</b>       | 2.272                | 2.272                | –                    | –                    | 2.681                | 2.681                | –                    | –                    |
|                   | <b>B97-1/BS3</b>       | 2.270                | 2.270                | –                    | –                    | 2.677                | 2.677                | –                    | –                    |
| <b>TS-5 (1,4)</b> | <b>Level of Theory</b> | <b>C<sub>1</sub></b> | <b>C<sub>2</sub></b> | <b>C<sub>3</sub></b> | <b>C<sub>4</sub></b> | <b>C<sub>5</sub></b> | <b>C<sub>6</sub></b> | <b>C<sub>7</sub></b> | <b>C<sub>8</sub></b> |
|                   | <b>PBE0/BS1</b>        | 2.167                | 2.259                | –                    | –                    | 2.164                | –                    | –                    | 2.259                |
|                   | <b>PBE0/BS3</b>        | 2.175                | 2.272                | –                    | –                    | 2.175                | –                    | –                    | 2.272                |
|                   | <b>PBEPBE/BS1</b>      | 2.193                | 2.291                | –                    | –                    | 2.212                | –                    | –                    | 2.292                |
|                   | <b>PBEPBE/BS2</b>      | 2.198                | 2.300                | –                    | –                    | 2.231                | –                    | –                    | 2.300                |
|                   | <b>PBEPBE/BS3</b>      | 2.199                | 2.302                | –                    | –                    | 2.233                | –                    | –                    | 2.302                |
|                   | <b>B3LYP/BS1</b>       | 2.216                | 2.321                | –                    | –                    | 2.215                | –                    | –                    | 2.321                |
|                   | <b>B3LYP/BS3</b>       | 2.221                | 2.331                | –                    | –                    | 2.228                | –                    | –                    | 2.331                |
|                   | <b>B3LYP/BS4</b>       | 2.218                | 2.326                | –                    | –                    | 2.217                | –                    | –                    | 2.326                |
|                   | <b>B3LYP/BS5</b>       | 2.215                | 2.326                | –                    | –                    | 2.220                | –                    | –                    | 2.325                |
|                   | <b>B97-1/BS2</b>       | 2.214                | 2.319                | –                    | –                    | 2.210                | –                    | –                    | 2.319                |
|                   | <b>B97-1/BS3</b>       | 2.207                | 2.310                | –                    | –                    | 2.204                | –                    | –                    | 2.310                |

Table S2.  $\Delta G/\Delta G^\ddagger$  values for fluxional transition states of (COT)Cr(CO)<sub>3</sub> (in kcal mol<sup>-1</sup>).

|                      | PBE0/<br>BS1 | PBE0/<br>BS3 | PBEPBE/<br>BS1 | PBEPBE/<br>BS2 | PBEPBE/<br>BS3 | B3LYP/<br>BS1 | B3LYP/<br>BS3 | B3LYP/<br>BS4 | B3LYP/<br>BS5 | B97-1/<br>BS2 | B97-1/<br>BS3 |
|----------------------|--------------|--------------|----------------|----------------|----------------|---------------|---------------|---------------|---------------|---------------|---------------|
| <b>I (minimum)</b>   | 0.0          | 0.0          | 0.0            | 0.0            | 0.0            | 0.0           | 0.0           | 0.0           | 0.0           | 0.0           | 0.0           |
| <b>TS-1 (CO-rot)</b> | 12.9         | 12.3         | 11.8           | 11.5           | 11.3           | 13.7          | 13.4          | 13.4          | 13.2          | 13.0          | 12.7          |
| <b>TS-2 (1,3)</b>    | 13.5         | 13.1         | 12.3           | 12.3           | 12.4           | 9.1           | 8.5           | 9.1           | 8.8           | 9.7           | 10.3          |
| <b>TS-3 (1,2)</b>    | 14.8         | 14.3         | 11.1           | 11.2           | 11.1           | 10.7          | 10.0          | 10.4          | 10.0          | 11.4          | 11.6          |
| <b>TS-4 (1,5)</b>    | 23.3         | 24.2         | 22.2           | 22.6           | 23.5           | 16.9          | 17.7          | 17.0          | 17.1          | 18.6          | 20.5          |
| <b>TS-5 (1,4)</b>    | 47.4         | 46.5         | 40.8           | 40.7           | 40.6           | 44.5          | 43.6          | 43.7          | 43.0          | 44.3          | 44.2          |

Table S3.  $\Delta E_e/\Delta E_e^\ddagger$  values for fluxional transition states of (COT)Cr(CO)<sub>3</sub> (in kcal mol<sup>-1</sup>).

|                      | PBE0/<br>BS1 | PBE0/<br>BS3 | PBEPBE/<br>BS1 | PBEPBE/<br>BS2 | PBEPBE/<br>BS3 | B3LYP/<br>BS1 | B3LYP/<br>BS3 | B3LYP/<br>BS4 | B3LYP/<br>BS5 | B97-1/<br>BS2 | B97-1/<br>BS3 | ccCA-TM |
|----------------------|--------------|--------------|----------------|----------------|----------------|---------------|---------------|---------------|---------------|---------------|---------------|---------|
| <b>I (minimum)</b>   | 0.0          | 0.0          | 0.0            | 0.0            | 0.0            | 0.0           | 0.0           | 0.0           | 0.0           | 0.0           | 0.0           | 0.0     |
| <b>TS-1 (CO-rot)</b> | 12.6         | 12.0         | 11.6           | 11.0           | 11.2           | 13.3          | 12.9          | 13.0          | 12.7          | 12.5          | 12.2          | 11.0    |
| <b>TS-2 (1,3)</b>    | 14.2         | 13.9         | 12.8           | 13.1           | 13.0           | 9.4           | 8.9           | 9.4           | 9.2           | 10.1          | 10.8          | 17.0    |
| <b>TS-3 (1,2)</b>    | 16.8         | 16.3         | 12.7           | 12.9           | 12.9           | 12.3          | 11.6          | 12.0          | 11.7          | 13.2          | 13.5          | 18.8    |
| <b>TS-4 (1,5)</b>    | 25.6         | 26.7         | 24.3           | 25.7           | 24.8           | 18.6          | 19.4          | 18.9          | 19.0          | 20.6          | 21.5          | 29.2    |
| <b>TS-5 (1,4)</b>    | 48.9         | 47.9         | 42.7           | 42.6           | 42.8           | 46.5          | 45.5          | 45.6          | 44.9          | 46.1          | 45.9          | 47.4    |

Table S4. Raw Energies Utilized in Assessment of ccCA-TM Energies Using P Extrapolation (in a.u.).

|                                         | <b>I (minimum)</b> | <b>TS-1 (CO-rot)</b> | <b>TS-2 (1,3)</b> | <b>TS-3 (1,2)</b> | <b>TS-4 (1,5)</b> | <b>TS-5 (1,4)</b> |
|-----------------------------------------|--------------------|----------------------|-------------------|-------------------|-------------------|-------------------|
| <b>HF/aug-cc-pVTZ-DK</b>                | -1695.768876       | -1695.746516         | -1695.766307      | -1695.752945      | -1695.747831      | -1695.704804      |
| <b>HF/aug-cc-pVQZ-DK</b>                | -1695.808584       | -1695.786219         | -1695.806079      | -1695.792743      | -1695.787631      | -1695.744553      |
| <b>HF/CBS-DK</b>                        | -1695.81826        | -1695.795893         | -1695.81577       | -1695.80244       | -1695.797329      | -1695.754239      |
| <b>MP2/aug-cc-pVDZ-DK</b>               | -1698.109075       | -1698.076155         | -1698.056546      | -1698.049605      | -1698.071521      | -1697.963276      |
| <b>MP2/aug-cc-pVTZ-DK</b>               | -1698.672971       | -1698.64005          | -1698.621527      | -1698.613677      | -1698.635623      | -1698.527119      |
| <b>MP2/aug-cc-pVQZ-DK</b>               | -1698.859862       | -1698.826771         | -1698.808645      | -1698.800487      | -1698.823193      | -1698.713826      |
| <b>MP2/CBS-DK + HF/CBS-DK (P)</b>       | -3.136330259       | -3.125477818         | -3.087719343      | -3.092691233      | -3.121012074      | -3.05416263       |
| <b>MP2/cc-pVTZ-DK</b>                   | -1698.61531        | -1698.582505         | -1698.565085      | -1698.557464      | -1698.577866      | -1698.471052      |
| <b>CCSD(T)/cc-pVTZ-DK</b>               | -1698.722693       | -1698.7046           | -1698.698031      | -1698.693904      | -1698.675409      | -1698.647357      |
| <b>CCSD(T)/aug-cc-pCVDZ-DK</b>          | -1698.259687       | -1698.242006         | -1698.232798      | -1698.229627      | -1698.211603      | -1698.184003      |
| <b>CCSD(T,FC1)/aug-cc-pCVDZ-DK</b>      | -1699.123923       | -1699.106407         | -1699.095199      | -1699.092212      | -1699.073703      | -1699.047402      |
| <b>D(CC)</b>                            | -0.1073827         | -0.1220958           | -0.1329461        | -0.1364394        | -0.0975427        | -0.1763049        |
| <b>D(CV)</b>                            | -0.8642364         | -0.8644015           | -0.8624008        | -0.8625851        | -0.8620994        | -0.8633987        |
| <b>ccCA-TM <math>E_e</math> (P)</b>     | -1699.926209       | -1699.907868         | -1699.898837      | -1699.894156      | -1699.877983      | -1699.848105      |
| <b>scaled ZPE</b>                       | 0.159248635        | 0.158487913          | 0.15893827        | 0.157185185       | 0.157532442       | 0.156622985       |
| <b>ccCA-TM <math>E_{ZPE}</math> (P)</b> | -1699.766961       | -1699.74938          | -1699.739898      | -1699.736971      | -1699.72045       | -1699.691482      |

Table S5.  $\Delta\Delta E_e/\Delta\Delta E_e^\ddagger$  values for fluxional transition states of (COT)Cr(CO)<sub>3</sub> and statistical parameters ( $R^2$  = least squared regression, m = slope, b = y-intercept) in kcal mol<sup>-1</sup> (relative to ccCA-TM).

|                      | PBE0/<br>BS1      | PBE0/<br>BS3      | PBEPBE/<br>BS1    | PBEPBE/<br>BS2    | PBEPBE/<br>BS3    | B3LYP/<br>BS1     | B3LYP/<br>BS3     | B3LYP/<br>BS4     | B3LYP/<br>BS5     | B97-1/<br>BS2     | B97-1/<br>BS3     |
|----------------------|-------------------|-------------------|-------------------|-------------------|-------------------|-------------------|-------------------|-------------------|-------------------|-------------------|-------------------|
| <b>R<sup>2</sup></b> | 0.982             | 0.988             | 0.979             | 0.984             | 0.983             | 0.904             | 0.913             | 0.911             | 0.915             | 0.937             | 0.950             |
| <b>m</b>             | 1.006<br>± 0.069  | 0.998<br>± 0.055  | 0.888<br>± 0.065  | 0.898<br>± 0.057  | 0.895<br>± 0.059  | 0.925<br>± 0.151  | 0.915<br>± 0.142  | 0.912<br>± 0.142  | 0.901<br>± 0.137  | 0.933<br>± 0.121  | 0.935<br>± 0.107  |
| <b>b</b>             | -0.998<br>± 1.739 | -1.065<br>± 1.398 | -0.913<br>± 1.657 | -0.926<br>± 1.438 | -0.965<br>± 1.502 | -2.345<br>± 3.827 | -2.442<br>± 3.592 | -2.263<br>± 3.604 | -2.282<br>± 3.480 | -2.102<br>± 3.080 | -1.904<br>± 2.710 |
| <b>I (minimum)</b>   | 0.0               | 0.0               | 0.0               | 0.0               | 0.0               | 0.0               | 0.0               | 0.0               | 0.0               | 0.0               | 0.0               |
| <b>TS-1 (CO-rot)</b> | 1.6               | 0.9               | 0.5               | -0.1              | 0.2               | 2.3               | 1.9               | 2.0               | 1.7               | 1.4               | 1.1               |
| <b>TS-2 (1,3)</b>    | -2.8              | -3.1              | -4.2              | -3.9              | -4.0              | -7.6              | -8.1              | -7.6              | -7.8              | -6.8              | -6.2              |
| <b>TS-3 (1,2)</b>    | -2.0              | -2.5              | -6.1              | -5.9              | -5.9              | -6.5              | -7.2              | -6.8              | -7.1              | -5.6              | -5.3              |
| <b>TS-4 (1,5)</b>    | -3.6              | -2.6              | -5.0              | -3.6              | -4.4              | -10.7             | -9.8              | -10.3             | -10.3             | -8.6              | -7.7              |
| <b>TS-5 (1,4)</b>    | 1.6               | 0.6               | -4.6              | -4.7              | -4.6              | -0.9              | -1.9              | -1.8              | -2.4              | -1.3              | -1.5              |

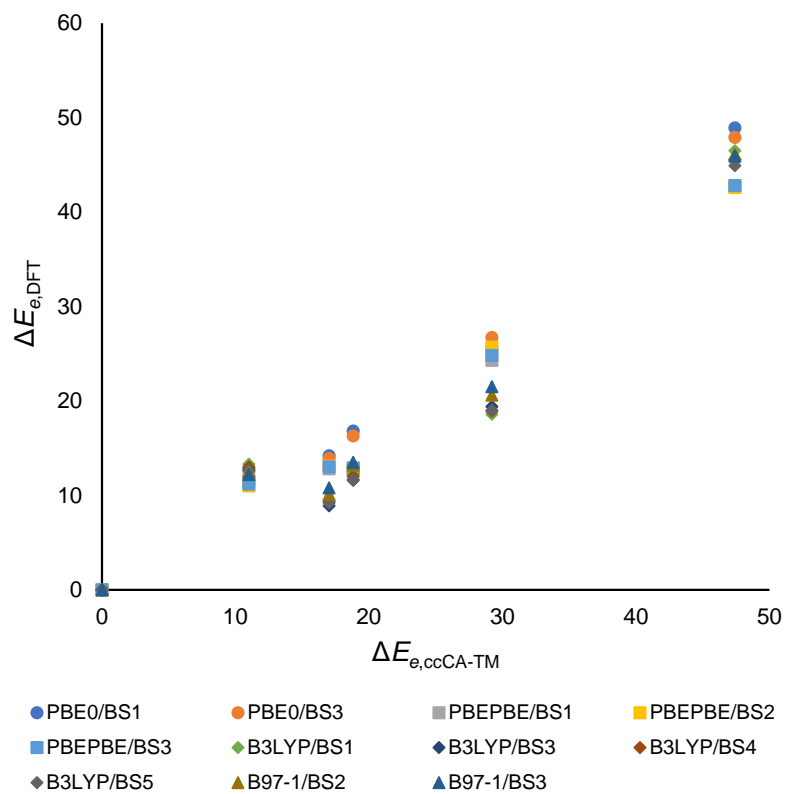

Figure S1. Plot of  $\Delta E_{e,DFT}$  vs.  $\Delta E_{e,ccCA-TM}$  (in kcal mol<sup>-1</sup>) for  $(COT)Cr(CO)_3$  computed at each level of theory.



Table S4. Experimental and computed bond lengths and angles for (TMCOT)Cr(CO)<sub>3</sub>; computed bond lengths and angles for (TMCOT)Mo(CO)<sub>3</sub> and (TMCOT)W(CO)<sub>3</sub> (PBE0/BS1 level of theory). (M = Cr, Mo, W)

|                 | (TMCOT)Cr(CO) <sub>3</sub> |       | (TMCOT)Mo(CO) <sub>3</sub> | (TMCOT)W(CO) <sub>3</sub> |
|-----------------|----------------------------|-------|----------------------------|---------------------------|
| Bond length (Å) | Expt                       | Comp  | Comp                       | Comp                      |
| M–C2            | 2.20                       | 2.18  | 2.31                       | 2.29                      |
| M–C3            | 2.29                       | 2.25  | 2.39                       | 2.36                      |
| M–C12           | 2.41                       | 2.39  | 2.50                       | 2.45                      |
| M–C13           | 2.21                       | 2.18  | 2.31                       | 2.29                      |
| M–C14           | 2.25                       | 2.23  | 2.37                       | 2.35                      |
| M–C15           | 2.23                       | 2.22  | 2.35                       | 2.33                      |
| M–C1            | 1.85                       | 1.84  | 1.99                       | 1.99                      |
| M–C8            | 1.86                       | 1.83  | 1.99                       | 1.99                      |
| M–C9            | 1.84                       | 1.83  | 1.99                       | 1.99                      |
| Bond angle (°)  | Expt                       | Comp  | Comp                       | Comp                      |
| C10–C11–C12     | 124.4                      | 123.2 | 124.9                      | 123.7                     |
| C11–C10–C3      | 121.0                      | 120.0 | 121.4                      | 120.1                     |
| C10–C3–C2       | 124.2                      | 123.2 | 123.8                      | 122.7                     |
| C3–C2–C15       | 125.1                      | 125.0 | 125.6                      | 124.9                     |
| C2–C15–C14      | 134.2                      | 133.1 | 133.9                      | 133.9                     |
| C1–M1–C8        | 94.2                       | 93.0  | 91.5                       | 92.1                      |
| C1–M1–C9        | 81.5                       | 81.8  | 82.5                       | 82.1                      |

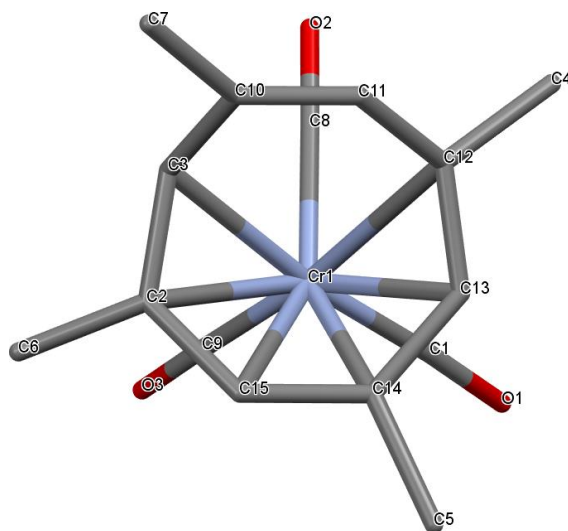

Figure S2. Top-down view of the reported crystal structure of (TMCOT)Cr(CO)<sub>3</sub> with atom labels. Hydrogens omitted for clarity.<sup>2</sup>

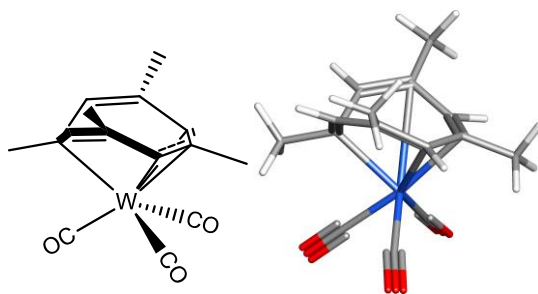

Figure S3. 2D and 3D representation of **TS-G**

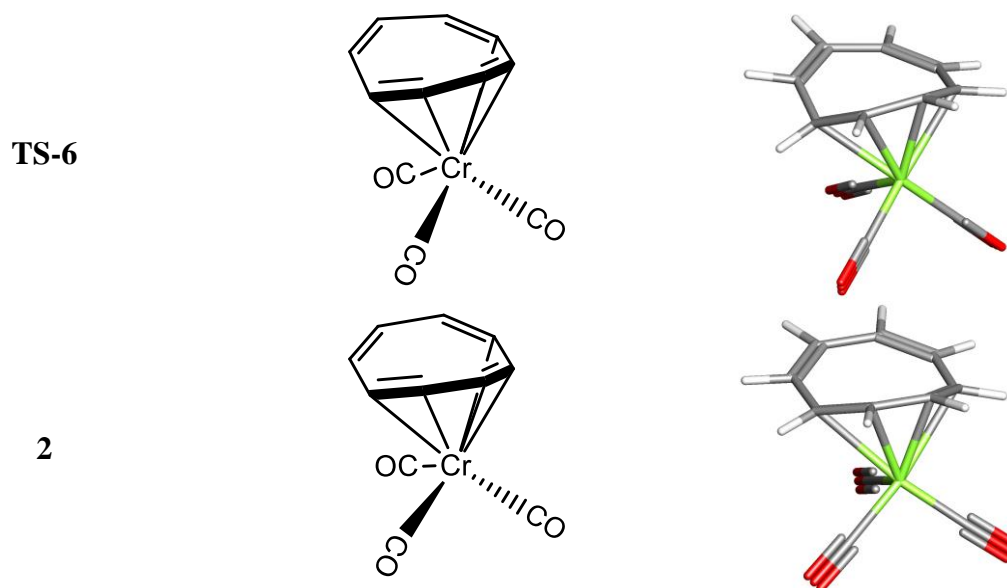

Figure S4. 2D and 3D representation of **TS-6** and **2**.

Table S7.  $\Delta G^\ddagger_{\text{solution}}$  of  $(\text{TMCOT})M(\text{CO})_3$  complexes with implicit chloroform solvation model at the SMD-PBE0//PBE0/BS1 level of theory (gas phase  $\Delta G^\ddagger$  in parentheses). All relative free energies reported in  $\text{kcal mol}^{-1}$ .

| Transition State     | $(\text{TMCOT})\text{Cr}(\text{CO})_3$ | $(\text{TMCOT})\text{Mo}(\text{CO})_3$ | $(\text{TMCOT})\text{W}(\text{CO})_3$ |
|----------------------|----------------------------------------|----------------------------------------|---------------------------------------|
| <b>TS-A (CO-rot)</b> | 12.8 (12.6)                            | 13.6 (13.8)                            | 11.7 (11.6)                           |
| <b>TS-B (1,2-a)</b>  | 14.0 (13.4)                            | 13.9 (12.8)                            | 14.5 (13.2)                           |
| <b>TS-C (1,3)</b>    | 18.3 (18.0)                            | 21.1 (18.0)                            | 27.0 (22.3)                           |
| <b>TS-D (1,5)</b>    | 23.2 (21.3)                            | 25.7 (20.3)                            | 33.2 (26.9)                           |
| <b>TS-E (1,2-b)</b>  | 20.9 (21.9)                            | 22.0 (22.5)                            | 24.0 (23.8)                           |
| <b>TS-F (1,4)</b>    | 47.4 (47.9)                            | 47.9 (46.3)                            | 48.5 (45.1)                           |

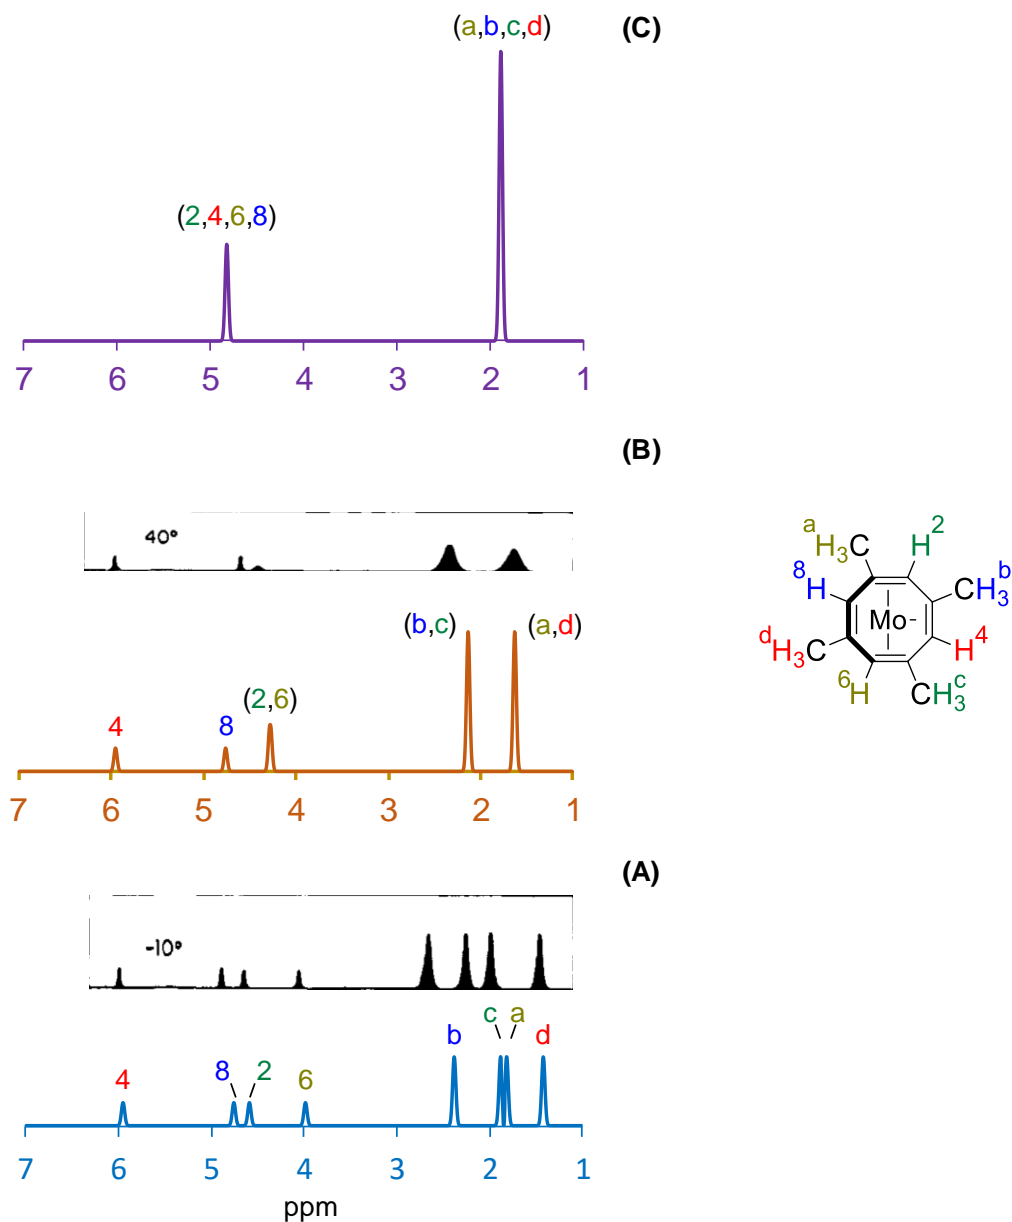

Figure S5. Simulated (colored) gas-phase and experimental (black)  $^1\text{H}$ -NMR for the lowest energy structure of  $(\text{TMCOT})\text{Mo}(\text{CO})_3$  at the GIAO-PBEPBE/BS6//PBEPBE/BS1 level of theory. Results given for low-temperature limit (A,  $-10^\circ\text{C}$ ), low temperature (B,  $40^\circ\text{C}$ ), and high-temperature limit (C,  $>80^\circ\text{C}$ ). Experimental  $^1\text{H}$ -NMR for high temperature limit not reported due to thermal decomposition of  $(\text{TMCOT})\text{Mo}(\text{CO})_3$  above  $80^\circ\text{C}$ . Experimental spectra adapted in part with permission from Cotton, F. A.; Faller, J. W.; Musco, A. Stereochemically Nonrigid Organometallic Compounds. II. 1,3,5,7-Tetramethylcyclo-Octatetraenemolybdenum Tricarbonyl. *J. Am. Chem. Soc.* **1966**, 88 (19), 4506–4507. Copyright (1966) American Chemical Society.

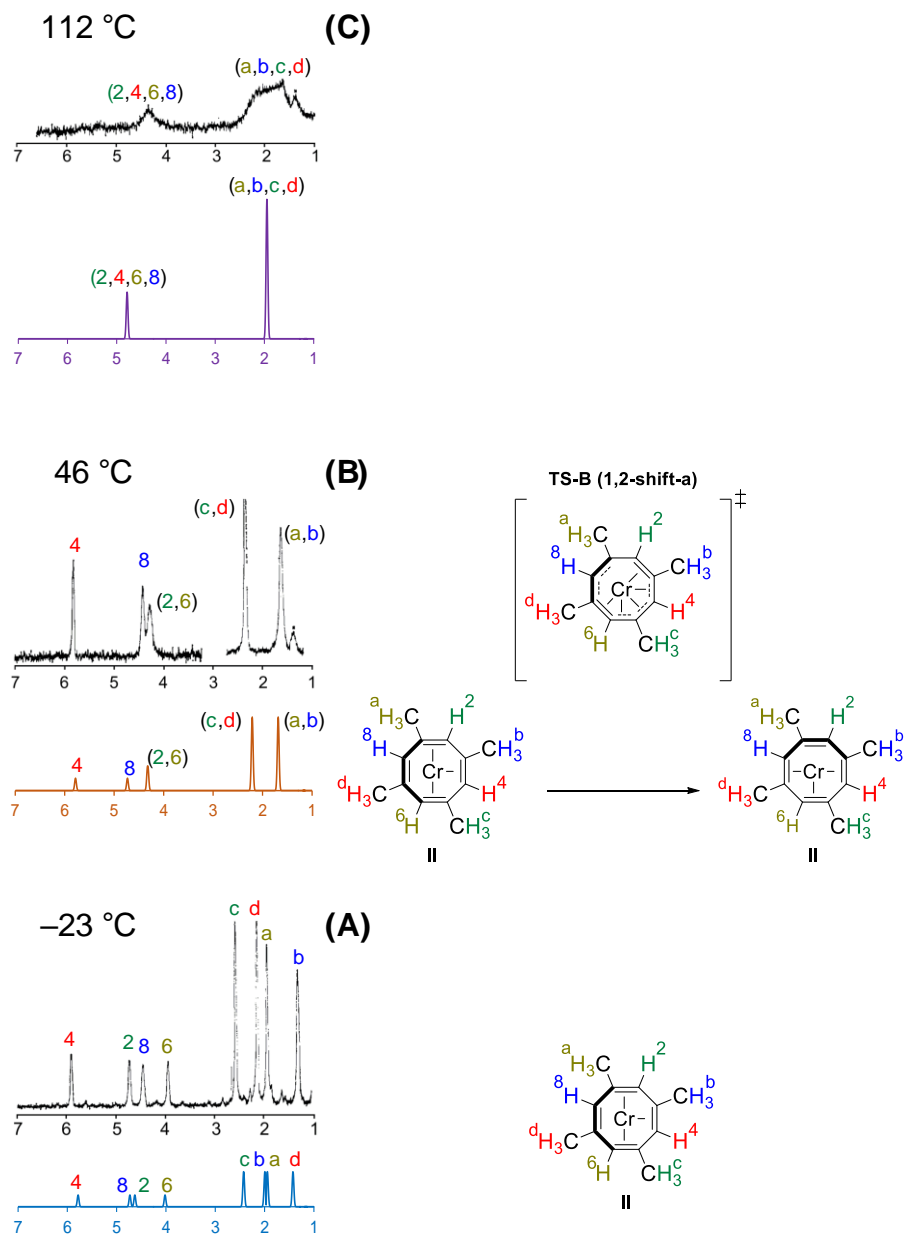

Figure S6. Simulated gas-phase (colored, GIAO-PBEPBE/BS6//PBEPBE/BS1) and experimental  $^1\text{H}$ -NMR for  $(\text{TMCOT})\text{Cr}(\text{CO})_3$  in three temperature regimes (A, B, C) with corresponding fluxional processes.  $(\text{CO})_3$  omitted for clarity. All chemical shifts are relative to tetramethylsilane (TMS). Experimental spectra adapted in part with permission from Cotton, F. A.; Faller, J. W.; Musco, A., Stereochemically nonrigid organometallic molecules. XII. Temperature dependence of the proton nuclear magnetic resonance spectra of the 1,3,5,7-tetramethylcyclooctatetraene tricarbonyl compounds of chromium, molybdenum, and tungsten *J. Am. Chem. Soc.*, **1968**, 90 (6), 1438-1444. Copyright (1968) American Chemical Society.

Table S8. Experimental and computed  $^1\text{H}$ -NMR chemical shifts in  $(\text{TMCOT})\text{Cr}(\text{CO})_3$  and  $(\text{TMCOT})\text{Mo}(\text{CO})_3$  at the GIAO-PBEPBE/BS6//PBEPBE/auto/BS1 level of theory (measured in ppm; relative to TMS).

| Low-temperature limit                                            | $(\text{TMCOT})\text{Cr}(\text{CO})_3$ |      | $(\text{TMCOT})\text{Mo}(\text{CO})_3$ |      |
|------------------------------------------------------------------|----------------------------------------|------|----------------------------------------|------|
|                                                                  | Expt ( $-23\text{ }^\circ\text{C}$ )   | Comp | Expt ( $-10\text{ }^\circ\text{C}$ )   | Comp |
| H(2)                                                             | 4.7                                    | 4.6  | 4.9                                    | 4.8  |
| H(8)                                                             | 4.3                                    | 4.7  | 4.6                                    | 4.6  |
| H(4)                                                             | 5.9                                    | 5.8  | 6.0                                    | 5.9  |
| H(6)                                                             | 3.9                                    | 4.0  | 4.0                                    | 4.0  |
| $\text{CH}_3(\text{a})$                                          | 2.6                                    | 2.4  | 1.4                                    | 1.4  |
| $\text{CH}_3(\text{b})$                                          | 1.9                                    | 1.9  | 1.9                                    | 1.8  |
| $\text{CH}_3(\text{c})$                                          | 1.3                                    | 1.4  | 2.6                                    | 2.3  |
| $\text{CH}_3(\text{d})$                                          | 2.1                                    | 2.0  | 2.2                                    | 1.9  |
| Low temperature                                                  | Exp ( $46\text{ }^\circ\text{C}$ )     | Comp | Exp ( $40\text{ }^\circ\text{C}$ )     | Comp |
| Average of H(2, 6)                                               | 4.2                                    | 4.3  | 4.4                                    | 4.3  |
| H(8)                                                             | 4.4                                    | 4.7  | 4.6                                    | 4.8  |
| H(4)                                                             | 5.6                                    | 5.8  | 6.0                                    | 5.9  |
| Average of $\text{CH}_3(\text{a}, \text{b})$                     | 2.3                                    | 2.2  | 1.7                                    | 1.6  |
| Average of $\text{CH}_3(\text{c}, \text{d})$                     | 1.6                                    | 1.7  | 2.4                                    | 2.1  |
| High-temperature limit                                           | Exp ( $112\text{ }^\circ\text{C}$ )    | Comp | Exp ( $> 80\text{ }^\circ\text{C}$ )   | Comp |
| Average of H(2, 4, 6, 8)                                         | 4.3                                    | 4.8  | —                                      | 4.8  |
| Average of $\text{CH}_3(\text{a}, \text{b}, \text{c}, \text{d})$ | 1.9                                    | 2.0  | —                                      | 1.9  |

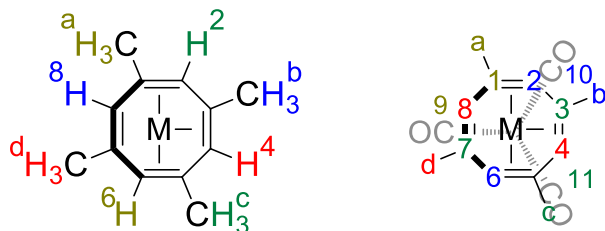

Figure S7. 2D-representation of  $(\text{TMCOT})\text{M}(\text{CO})_3$  ( $\text{M} = \text{Cr}, \text{Mo}$ ) with hydrogens labelled.  $(\text{CO})_3$  omitted for clarity.

Table S9. Computed chemical shifts for  $^{13}\text{C}$ -NMR in  $(\text{TMCOT})\text{Cr}(\text{CO})_3$  at the GIAO-PBEPBE/BS6//PBEPBE/auto/BS1 (relative to TMS). See Figure S for appropriate atom labelling.

| <b>Chemical Shift (ppm)</b> | <b>C(1)</b> | <b>C(2)</b> | <b>C(3)</b> | <b>C(4)</b> | <b>C(5)</b> | <b>C(6)</b> | <b>C(7)</b> | <b>C(8)</b> | <b>C(9)</b> | <b>C(10)</b> | <b>C(11)</b> | <b>C(a)</b> | <b>C(b)</b> | <b>C(c)</b> | <b>C(d)</b> |
|-----------------------------|-------------|-------------|-------------|-------------|-------------|-------------|-------------|-------------|-------------|--------------|--------------|-------------|-------------|-------------|-------------|
| <b>Expt.</b>                | 114.2       | 104.7       | 112.0       | 106.7       | 112.9       | 89.5        | 139.8       | 126.3       | –           | –            | –            | 26.7        | 29.5        | 31.6        | 23.2        |
| <b>Comp.</b>                | 123.7       | 111.6       | 120.3       | 113.4       | 121.8       | 98.4        | 150.6       | 134.7       | 245.3       | 226.6        | 245.3        | 29.5        | 33.9        | 35.0        | 25.8        |

\*Experimental  $^{13}\text{C}$  chemical shifts reported at  $-24^\circ\text{C}$ . No experimental  $^{13}\text{C}$  chemical shift for CO groups were reported.

Table S10. Basis Sets Used in Study

| <b>Basis Set</b> |                                                                              |
|------------------|------------------------------------------------------------------------------|
| BS1              | 6-31G(d') for H, C, O<br>mod-LANL2DZ(f) with ECP for transition metals       |
| BS2              | 6-311++G(2df,2p) for H, C, O<br>mod-LANL2TZ uncontracted to [4s4p3d] for Cr  |
| BS3              | cc-pVTZ for all atoms                                                        |
| BS4              | aug-cc-pVDZ for H, C, O<br>LANL2DZ with LANL2DZ ECP for Cr                   |
| BS5              | aug-cc-pVDZ for H, C, O<br>SDD with ECP for Cr                               |
| BS6              | IGLO-II for H, C, O<br>LANL08 with ECP for Cr, Mo<br>LANI2DZ with ECP for Si |

# Molecular Coordinates for (COT)Cr(CO)<sub>3</sub> (Å)

## PBE0/BS1

```

I
Cr -0.047386 -0.350179 0.000000
C 1.792849 -0.230768 0.000000
O 2.936391 -0.104733 0.000000
C -0.033948 -1.738162 1.212834
O -0.011026 -2.634624 1.935405
C -0.033948 -1.738162 -1.212834
O -0.011026 -2.634624 -1.935405
C 0.388442 2.672437 -0.662865
C 0.251721 1.424132 -1.441166
C -0.951791 0.746798 -1.646664
C -1.985007 0.450346 -0.703748
C -1.985007 0.450346 0.703748
C -0.951791 0.746798 1.646664
C 0.251721 1.424132 1.441166
C 0.388442 2.672437 0.662865
H 0.465661 3.601360 -1.231928
H 0.961541 1.313251 -2.263119
H -1.078535 0.227227 -2.597455
H -2.832431 -0.084766 -1.131544
H -2.832431 -0.084766 1.131544
H -1.078535 0.227227 2.597455
H 0.961541 1.313251 2.263119
H 0.465661 3.601360 1.231928
el energy= -735.149798374
zpe= -734.986335
th energy= -734.972586
th enthalpy= -734.971641
free energy= -735.026599

```

## TS-1

```

Cr 0.310131 0.000000 0.018983
C 1.095356 1.232989 -1.097863
O 1.579159 2.013491 -1.793251
C 1.867616 0.000023 1.021824
O 2.830923 0.000037 1.649063
C 1.095361 -1.233030 -1.097816
O 1.579165 -2.013555 -1.793176
C -2.706384 -0.661238 -0.645047
C -1.420389 -1.375048 -0.475073
C -0.885885 -1.651973 0.807857
C -0.706449 -0.715281 1.849466
C -0.706448 0.715333 1.849446
C -0.885884 1.651996 0.807811
C -1.420389 1.375036 -0.475111
C -2.706384 0.661222 -0.645065
H -3.618362 -1.257784 -0.723130
H -1.251502 -2.176911 -1.197722
H -0.417549 -2.619525 0.993061
H -0.251507 -1.131364 2.748264
H -0.251505 1.131441 2.748232
H -0.417546 2.619553 0.992988
H -1.251501 2.176878 -1.197783
H -3.618362 1.257767 -0.723164
el energy= -735.129678719
zpe= -734.967003
th energy= -734.954009
th enthalpy= -734.953065
free energy= -735.006011

```

## TS-2

```

Cr 0.034057 -0.437936 0.000000
C -1.170854 -0.998304 1.314095
O -1.908003 -1.368251 2.111953
C -1.170854 -0.998304 -1.314095

```

```

O -1.908003 -1.368251 -2.111953
C 0.755537 -2.086267 0.000000
O 1.240084 -3.134776 0.000000
C -0.040607 1.940984 1.663419
C 0.892715 0.810886 1.620733
C 1.877254 0.396858 0.713294
C 1.877254 0.396858 -0.713294
C 0.892715 0.810886 -1.620733
C -0.040607 1.940984 -1.663419
C -0.628680 2.720011 -0.729171
C -0.628680 2.720011 0.729171
H -0.353890 2.155900 2.685102
H 1.062675 0.403114 2.616229
H 2.633728 -0.261324 1.139553
H 2.633728 -0.261324 -1.139553
H 1.062675 0.403114 -2.616229
H -0.353890 2.155900 -2.685102
H -1.293090 3.478852 -1.141779
H -1.293090 3.478852 1.141779
el energy= -735.127176234
zpe= -734.964222
th energy= -734.950597
th enthalpy= -734.949653
free energy= -735.005093

```

## TS-3

```

Cr -0.010092 -0.469499 0.000000
C 1.869771 -0.409652 0.000000
O 3.013836 -0.349533 0.000000
C -0.075570 -1.842036 1.217733
O -0.114803 -2.726831 1.955049
C -0.075570 -1.842036 -1.217733
O -0.114803 -2.726831 -1.955049
C -2.047149 0.285865 0.000000
C -1.438474 0.489015 1.253561
C -0.271033 1.222752 1.633620
C 0.246108 2.472932 1.228887
C 0.315174 3.120576 0.000000
C 0.246108 2.472932 -1.228887
C -0.271033 1.222752 -1.633620
C -1.438474 0.489015 -1.253561
H -2.941106 -0.334294 0.000000
H -1.926046 -0.033705 2.076872
H 0.050886 0.947388 2.637906
H 0.769443 2.998010 2.032970
H 0.761750 4.111780 0.000000
H 0.769443 2.998010 -2.032970
H 0.050886 0.947388 -2.637906
H -1.926046 -0.033705 -2.076872
el energy= -735.122989876
zpe= -734.961852
th energy= -734.947906
th enthalpy= -734.946962
free energy= -735.003058

```

## TS-4

```

Cr -0.059206 0.442055 0.000000
C -1.592175 1.483257 0.000000
O -2.513954 2.173374 0.000000
C 0.622660 1.559141 1.241339
O 1.065784 2.265894 2.043411
C 0.622660 1.559141 -1.241339
O 1.065784 2.265894 -2.043411
C -1.494592 -1.642534 -0.677706
C -0.462542 -2.152853 -1.587956
C 0.844500 -1.831234 -1.594021
C 1.561781 -0.919414 -0.694092

```

C 1.561781 -0.919414 0.694092  
 C 0.844500 -1.831234 1.594021  
 C -0.462542 -2.152853 1.587956  
 C -1.494592 -1.642534 0.677706  
 H -2.403613 -1.285322 -1.165611  
 H -0.836591 -2.771133 -2.405419  
 H 1.442166 -2.212310 -2.424329  
 H 2.383741 -0.384948 -1.169089  
 H 2.383741 -0.384948 1.169089  
 H 1.442166 -2.212310 2.424329  
 H -0.836591 -2.771133 2.405419  
 H -2.403613 -1.285322 1.165611  
 el energy= -735.108933361  
 zpe= -734.947626  
 th energy= -734.933504  
 th enthalpy= -734.932560  
 free energy= -734.989541

#### TS-5

Cr 0.382049 -0.000318 -0.332554  
 C 1.366445 -1.528776 -0.546299  
 O 2.013263 -2.459863 -0.745464  
 C 1.423902 -0.000347 1.149780  
 O 2.111739 -0.000431 2.080484  
 C 1.368345 1.526906 -0.547007  
 O 2.016342 2.457104 -0.746435  
 C -1.292121 1.290430 -1.128948  
 C -1.295978 0.000872 -1.703259  
 C -1.293409 -1.288798 -1.129173  
 C -1.907995 -1.770460 0.121396  
 C -1.636945 -1.237009 1.316672  
 C -0.807391 0.000139 1.475153  
 C -1.634994 1.238582 1.317114  
 C -1.905475 1.772686 0.121957  
 H -1.077127 2.078884 -1.851388  
 H -0.890172 0.000822 -2.721611  
 H -1.079138 -2.077354 -1.851718  
 H -2.538245 -2.657651 0.046002  
 H -2.060099 -1.680718 2.220206  
 H -0.370478 -0.000409 2.479004  
 H -2.056943 1.683104 2.220809  
 H -2.534016 2.661121 0.046997  
 el energy= -735.071838896  
 zpe= -734.910833  
 th energy= -734.897253  
 th enthalpy= -734.896309  
 free energy= -734.951098

#### TS-6

Cr -0.766299 0.012947 -0.319934  
 C -0.232826 0.011821 1.424946  
 O 0.080115 0.082902 2.530281  
 C -1.605469 1.622479 0.122030  
 O -2.079781 2.613259 0.456454

#### PBE0/BS3

I  
 Cr -0.045253 -0.347029 0.000000  
 C 1.809447 -0.235706 0.000000  
 O 2.948540 -0.120341 0.000000  
 C -0.040733 -1.746705 1.213008  
 O -0.023974 -2.647616 1.922416  
 C -0.040733 -1.746705 -1.213008  
 O -0.023974 -2.647616 -1.922416  
 C 0.394486 2.669977 -0.658862  
 C 0.244461 1.432614 -1.441695  
 C -0.953293 0.756568 -1.641569  
 C -1.978682 0.457504 -0.701031  
 C -1.978682 0.457504 0.701031

C -2.192608 -1.054599 0.071969  
 O -3.082539 -1.764261 0.259676  
 C 1.997524 -1.599727 0.477649  
 C 0.694821 -1.743794 -0.204947  
 C 0.337352 -1.313294 -1.493495  
 C 0.510007 0.005816 -2.023413  
 C 0.923385 1.202759 -1.430154  
 C 1.881882 1.564460 -0.391712  
 C 2.708394 0.854510 0.410969  
 C 2.841311 -0.567681 0.673283  
 H 2.328369 -2.549991 0.900303  
 H 0.200407 -2.673267 0.077919  
 H -0.311768 -1.963662 -2.079582  
 H -0.072897 0.166812 -2.935160  
 H 0.615176 2.070242 -2.012844  
 H 1.967870 2.646558 -0.289809  
 H 3.385575 1.463271 1.010365  
 H 3.753458 -0.822403 1.213194  
 el energy= -735.109479356  
 zpe= -734.947345  
 th energy= -734.933640  
 th enthalpy= -734.932696  
 free energy= -734.988047

#### 2

Cr -0.875553 0.000033 -0.304650  
 C -0.184098 -0.000025 1.409215  
 O 0.232186 0.000032 2.484271  
 C -2.009346 1.425034 0.142342  
 O -2.676839 2.326929 0.409551  
 C -2.009994 -1.424474 0.142151  
 O -2.677856 -2.326127 0.409267  
 C 2.034607 -1.663496 0.043727  
 C 0.883018 -1.630800 -0.858883  
 C 0.433302 -0.722114 -1.817720  
 C 0.433412 0.721329 -1.817999  
 C 0.883440 1.630420 -0.859707  
 C 2.034831 1.663298 0.043087  
 C 2.877753 0.726626 0.547517  
 C 2.877693 -0.726773 0.547749  
 H 2.266229 -2.684222 0.349721  
 H 0.476162 -2.628785 -1.018201  
 H -0.200522 -1.155691 -2.595440  
 H -0.200430 1.154615 -2.595877  
 H 0.476726 2.628378 -1.019513  
 H 2.266478 2.684105 0.348803  
 H 3.690494 1.140884 1.144132  
 H 3.690502 -1.140900 1.144364  
 el energy= -735.896316253  
 zpe= -735.735743  
 th energy= -735.720950  
 th enthalpy= -735.720006  
 free energy= -735.778222

C -0.953293 0.756568 1.641569  
 C 0.244461 1.432614 1.441695  
 C 0.394486 2.669977 0.658862  
 H 0.485774 3.596241 -1.221298  
 H 0.944533 1.330614 -2.266691  
 H -1.087278 0.252302 -2.593810  
 H -2.828136 -0.065143 -1.127794  
 H -2.828136 -0.065143 1.127794  
 H -1.087278 0.252302 2.593810  
 H 0.944533 1.330614 2.266691  
 H 0.485774 3.596241 1.221298  
 el energy= -1693.41122721  
 zpe= -1693.248461



```

th energy= -1693.234711
th enthalpy= -1693.233767
free energy= -1693.288845

TS-1
Cr -0.022176 -0.307633 0.000000
C 1.098150 -1.101654 1.240198
O 1.789672 -1.589054 2.014344
C -1.032211 -1.874149 0.000000
O -1.648874 -2.837940 0.000000
C 1.098150 -1.101654 -1.240198
O 1.789672 -1.589054 -2.014344
C 0.659856 2.697981 -0.657193
C 0.471657 1.421958 -1.374191
C -0.809403 0.896086 -1.645781
C -1.845105 0.716888 -0.712255
C -1.845105 0.716888 0.712255
C -0.809403 0.896086 1.645781
C 0.471657 1.421958 1.374191
C 0.659856 2.697981 0.657193
H 0.754212 3.606867 -1.247713
H 1.185965 1.254784 -2.177149
H -1.003388 0.449226 -2.616188
H -2.746845 0.279796 -1.128177
H -2.746845 0.279796 1.128177
H -1.003388 0.449226 2.616188
H 1.185965 1.254784 2.177149
H 0.754212 3.606867 1.247713
el energy= -1693.39215710
zpe= -1693.230127
th energy= -1693.217163
th enthalpy= -1693.216219
free energy= -1693.269197

TS-2
Cr 0.040766 -0.434714 0.000000
C -1.163135 -1.022661 1.319652
O -1.886009 -1.416544 2.111424
C -1.163135 -1.022661 -1.319652
O -1.886009 -1.416544 -2.111424
C 0.778068 -2.083933 0.000000
O 1.261671 -3.127869 0.000000
C -0.064241 1.945093 1.654793
C 0.890589 0.842028 1.615448
C 1.871545 0.434609 0.709825
C 1.871545 0.434609 -0.709825
C 0.890589 0.842028 -1.615448
C -0.064241 1.945093 -1.654793
C -0.664046 2.709675 -0.725799
C -0.664046 2.709675 0.725799
H -0.383148 2.152262 2.671597
H 1.072535 0.449911 2.609737
H 2.645860 -0.192914 1.137438
H 2.645860 -0.192914 -1.137438
H 1.072535 0.449911 -2.609737
H -0.383148 2.152262 -2.671597
H -1.341534 3.450472 -1.138037
H -1.341534 3.450472 1.138037
el energy= -1693.38908154
zpe= -1693.226883
th energy= -1693.213236
th enthalpy= -1693.212292
free energy= -1693.267947

TS-3
Cr -0.007357 -0.457183 0.000000
C 1.891484 -0.424342 0.000000
O 3.031051 -0.400048 0.000000
C -0.083945 -1.841810 1.215821
O -0.133269 -2.734442 1.935118

```

```

C -0.083945 -1.841810 -1.215821
O -0.133269 -2.734442 -1.935118
C -2.046099 0.294569 0.000000
C -1.450199 0.507815 1.250921
C -0.295146 1.242843 1.640601
C 0.261938 2.463792 1.226644
C 0.362381 3.097465 0.000000
C 0.261938 2.463792 -1.226644
C -0.295146 1.242843 -1.640601
C -1.450199 0.507815 -1.250921
H -2.941166 -0.315361 0.000000
H -1.943490 -0.005085 2.069920
H 0.008071 0.977109 2.648366
H 0.795292 2.974992 2.026653
H 0.843517 4.067334 0.000000
H 0.795292 2.974992 -2.026653
H 0.008071 0.977109 -2.648366
H -1.943490 -0.005085 -2.069920
el energy= -1693.38518754
zpe= -1693.224728
th energy= -1693.210764
th enthalpy= -1693.209820
free energy= -1693.266117

TS-4
Cr -0.059766 0.432854 0.000000
C -1.590165 1.490371 0.000000
O -2.493972 2.196050 0.000000
C 0.625629 1.561029 1.237165
O 1.068321 2.278677 2.023189
C 0.625629 1.561029 -1.237165
O 1.068321 2.278677 -2.023189
C -1.492124 -1.641567 -0.674166
C -0.468583 -2.142594 -1.588334
C 0.834182 -1.834722 -1.593424
C 1.561109 -0.944293 -0.690853
C 1.561109 -0.944293 0.690853
C 0.834182 -1.834722 1.593424
C -0.468583 -2.142594 1.588334
C -1.492124 -1.641567 0.674166
H -2.403672 -1.297706 -1.156197
H -0.847202 -2.740625 -2.412519
H 1.421085 -2.206499 -2.429524
H 2.385519 -0.421255 -1.162725
H 2.385519 -0.421255 1.162725
H 1.421085 -2.206499 2.429524
H -0.847202 -2.740625 2.412519
H -2.403672 -1.297706 1.156197
el energy= -1693.36874019
zpe= -1693.208124
th energy= -1693.193999
th enthalpy= -1693.193055
free energy= -1693.250206

TS-5
Cr 0.339404 0.383199 0.000000
C 0.554602 1.394439 1.522448
O 0.735601 2.045680 2.447702
C -1.154829 1.420179 0.000000
O -2.086286 2.098804 0.000000
C 0.554602 1.394439 -1.522448
O 0.735601 2.045680 -2.447702
C 1.128399 -1.316018 -1.286005
C 1.693993 -1.317967 0.000000
C 1.128399 -1.316018 1.286005
C -0.125317 -1.908234 1.771444
C -1.312381 -1.642561 1.237100
C -1.470701 -0.822788 0.000000
C -1.312381 -1.642561 -1.237100
C -0.125317 -1.908234 -1.771444

```

|   |           |           |           |
|---|-----------|-----------|-----------|
| H | 1.853203  | -1.116452 | -2.069044 |
| H | 2.720663  | -0.947563 | 0.000000  |
| H | 1.853203  | -1.116452 | 2.069044  |
| H | -0.056678 | -2.526552 | 2.661990  |
| H | -2.212670 | -2.053992 | 1.686678  |
| H | -2.467830 | -0.384583 | 0.000000  |
| H | -2.212670 | -2.053992 | -1.686678 |

# **PBEPBE/auto/BS1**

|                           |           |           |           |
|---------------------------|-----------|-----------|-----------|
| I                         |           |           |           |
| Cr                        | -0.053397 | -0.352388 | 0.000000  |
| C                         | 1.791775  | -0.274455 | 0.000000  |
| O                         | 2.956245  | -0.192955 | 0.000000  |
| C                         | -0.060357 | -1.753806 | 1.195051  |
| O                         | -0.044046 | -2.681154 | 1.908587  |
| C                         | -0.060357 | -1.753806 | -1.195051 |
| O                         | -0.044046 | -2.681154 | -1.908587 |
| C                         | 0.429587  | 2.700629  | -0.668771 |
| C                         | 0.272816  | 1.453148  | -1.455678 |
| C                         | -0.946660 | 0.777454  | -1.659266 |
| C                         | -1.992670 | 0.501223  | -0.709596 |
| C                         | -1.992670 | 0.501223  | 0.709596  |
| C                         | -0.946660 | 0.777454  | 1.659266  |
| C                         | 0.272816  | 1.453148  | 1.455678  |
| C                         | 0.429587  | 2.700629  | 0.668771  |
| H                         | 0.528432  | 3.636203  | -1.240363 |
| H                         | 0.987986  | 1.329244  | -2.282275 |
| H                         | -1.083831 | 0.258859  | -2.618499 |
| H                         | -2.856074 | -0.023130 | -1.140303 |
| H                         | -2.856074 | -0.023130 | 1.140303  |
| H                         | -1.083831 | 0.258859  | 2.618499  |
| H                         | 0.987986  | 1.329244  | 2.282275  |
| H                         | 0.528432  | 3.636203  | 1.240363  |
| el energy= -735.218624797 |           |           |           |
| zpe= -735.061293          |           |           |           |
| th energy= -735.047063    |           |           |           |
| th enthalpy= -735.046119  |           |           |           |
| free energy= -735.102078  |           |           |           |

## **TS-1**

|    |           |           |           |
|----|-----------|-----------|-----------|
| Cr | -0.311404 | 0.000036  | -0.028314 |
| C  | -1.133581 | 1.222759  | 1.072975  |
| O  | -1.666240 | 1.997377  | 1.769280  |
| C  | -1.861648 | -0.001347 | -1.039936 |
| O  | -2.847917 | -0.002109 | -1.665224 |
| C  | -1.132487 | -1.221230 | 1.075343  |
| O  | -1.664406 | -1.995115 | 1.773037  |
| C  | 2.730094  | -0.666608 | 0.699252  |
| C  | 1.447012  | -1.390853 | 0.498937  |
| C  | 0.922657  | -1.663826 | -0.801345 |
| C  | 0.759318  | -0.721048 | -1.854705 |
| C  | 0.759421  | 0.719775  | -1.855200 |
| C  | 0.922776  | 1.663248  | -0.802473 |
| C  | 1.447045  | 1.391505  | 0.498090  |
| C  | 2.730071  | 0.667365  | 0.699049  |
| H  | 3.648452  | -1.265788 | 0.802213  |
| H  | 1.255953  | -2.195547 | 1.225164  |
| H  | 0.455038  | -2.639620 | -0.994742 |
| H  | 0.319494  | -1.141625 | -2.768830 |
| H  | 0.319664  | 1.139691  | -2.769656 |
| H  | 0.455182  | 2.638885  | -0.996738 |
| H  | 1.255928  | 2.196895  | 1.223521  |

|                           |           |           |           |
|---------------------------|-----------|-----------|-----------|
| H                         | -0.056678 | -2.526552 | -2.661990 |
| el energy= -1693.33486428 |           |           |           |
| zpe= -1693.174562         |           |           |           |
| th energy= -1693.160999   |           |           |           |
| th enthalpy= -1693.160055 |           |           |           |
| free energy= -1693.214782 |           |           |           |

|                           |          |          |          |
|---------------------------|----------|----------|----------|
| H                         | 3.648411 | 1.266589 | 0.801927 |
| el energy= -735.200181685 |          |          |          |
| zpe= -735.043660          |          |          |          |
| th energy= -735.030153    |          |          |          |
| th enthalpy= -735.029208  |          |          |          |
| free energy= -735.083254  |          |          |          |

## **TS-2**

|                           |           |           |           |
|---------------------------|-----------|-----------|-----------|
| Cr                        | 0.027808  | -0.444925 | 0.000000  |
| C                         | -1.129959 | -1.074035 | 1.320346  |
| O                         | -1.849495 | -1.509754 | 2.127971  |
| C                         | -1.129959 | -1.074035 | -1.320346 |
| O                         | -1.849495 | -1.509754 | -2.127971 |
| C                         | 0.786000  | -2.068672 | 0.000000  |
| O                         | 1.293757  | -3.127992 | 0.000000  |
| C                         | -0.084169 | 1.990242  | 1.675048  |
| C                         | 0.870729  | 0.874502  | 1.634465  |
| C                         | 1.862184  | 0.457328  | 0.718644  |
| C                         | 1.862184  | 0.457328  | -0.718644 |
| C                         | 0.870729  | 0.874502  | -1.634465 |
| C                         | -0.084169 | 1.990242  | -1.675048 |
| C                         | -0.682087 | 2.774580  | -0.730871 |
| C                         | -0.682087 | 2.774580  | 0.730871  |
| H                         | -0.411247 | 2.196544  | 2.703100  |
| H                         | 1.043012  | 0.461023  | 2.636244  |
| H                         | 2.635654  | -0.190912 | 1.150443  |
| H                         | 2.635654  | -0.190912 | -1.150443 |
| H                         | 1.043012  | 0.461023  | -2.636244 |
| H                         | -0.411247 | 2.196544  | -2.703100 |
| H                         | -1.358380 | 3.532760  | -1.147741 |
| H                         | -1.358380 | 3.532760  | 1.147741  |
| el energy= -735.198189551 |           |           |           |
| zpe= -735.041114          |           |           |           |
| th energy= -735.027043    |           |           |           |
| th enthalpy= -735.026098  |           |           |           |
| free energy= -735.082544  |           |           |           |

## **TS-3**

|    |           |           |           |
|----|-----------|-----------|-----------|
| Cr | -0.006078 | -0.478057 | 0.000000  |
| C  | 1.872407  | -0.466279 | 0.000000  |
| O  | 3.036203  | -0.455748 | 0.000000  |
| C  | -0.104528 | -1.864087 | 1.192002  |
| O  | -0.163964 | -2.783061 | 1.916844  |
| C  | -0.104528 | -1.864087 | -1.192002 |
| O  | -0.163964 | -2.783061 | -1.916844 |
| C  | -2.043439 | 0.332011  | 0.000000  |
| C  | -1.431605 | 0.533175  | 1.265595  |
| C  | -0.253195 | 1.262637  | 1.646892  |
| C  | 0.268075  | 2.523650  | 1.240292  |
| C  | 0.342025  | 3.169324  | 0.000000  |
| C  | 0.268075  | 2.523650  | -1.240292 |
| C  | -0.253195 | 1.262637  | -1.646892 |
| C  | -1.431605 | 0.533175  | -1.265595 |

H -2.951089 -0.282873 0.000000  
H -1.925359 0.005676 2.092893  
H 0.076606 0.979144 2.655379  
H 0.786911 3.057250 2.053103  
H 0.783523 4.172218 0.000000  
H 0.786911 3.057250 -2.053103  
H 0.076606 0.979144 -2.655379  
H -1.925359 0.005676 -2.092893  
el energy= -735.198327495  
zpe= -735.042699  
th energy= -735.028343  
th enthalpy= -735.027399  
free energy= -735.084461

#### TS-4

Cr -0.053243 0.421556 0.000000  
C -1.608039 1.426423 0.000000  
O -2.557207 2.109518 0.000000  
C 0.600236 1.574062 1.216495  
O 1.034495 2.324644 2.010459  
C 0.600236 1.574062 -1.216495  
O 1.034495 2.324644 -2.010459  
C -1.490423 -1.672075 -0.685667  
C -0.453363 -2.130123 -1.622680  
C 0.868401 -1.805700 -1.627242  
C 1.606311 -0.933036 -0.700348  
C 1.606311 -0.933036 0.700348  
C 0.868401 -1.805700 1.627242  
C -0.453363 -2.130123 1.622680  
C -1.490423 -1.672075 0.685667  
H -2.426209 -1.350456 -1.165759  
H -0.834018 -2.696614 -2.484698  
H 1.451429 -2.133570 -2.500691  
H 2.437717 -0.391287 -1.169815  
H 2.437717 -0.391287 1.169815  
H 1.451429 -2.133570 2.500691  
H -0.834018 -2.696614 2.484698

#### PBEPBE/BS2

I

Cr -0.055821 -0.347342 0.000000  
C 1.801726 -0.304964 0.000000  
O 2.961053 -0.253093 0.000000  
C -0.079778 -1.757488 1.197275  
O -0.071014 -2.685655 1.899302  
C -0.079778 -1.757488 -1.197275  
O -0.071014 -2.685655 -1.899302  
C 0.456955 2.693087 -0.664576  
C 0.276968 1.458572 -1.455814  
C -0.942132 0.796059 -1.654122  
C -1.983271 0.526768 -0.706489  
C -1.983271 0.526768 0.706489  
C -0.942132 0.796059 1.654122  
C 0.276968 1.458572 1.455814  
C 0.456955 2.693087 0.664576  
H 0.576829 3.623773 -1.229246  
H 0.983830 1.334307 -2.281639  
H -1.090864 0.294313 -2.613765  
H -2.853675 0.026229 -1.136237  
H -2.853675 0.026229 1.136237  
H -1.090864 0.294313 2.613765  
H 0.983830 1.334307 2.281639

H -2.426209 -1.350456 1.165759  
el energy= -735.179977018  
zpe= -735.024338  
th energy= -735.009827  
th enthalpy= -735.008883  
free energy= -735.066692

#### TS-5

Cr 0.351482 -0.000448 -0.288416  
C 1.369976 -1.496266 -0.552929  
O 2.062771 -2.407907 -0.799886  
C 1.461479 0.000604 1.157993  
O 2.181570 0.001065 2.086392  
C 1.370596 1.494632 -0.554604  
O 2.063652 2.405842 -0.802411  
C -1.324353 1.302057 -1.153218  
C -1.302506 0.001096 -1.727667  
C -1.324905 -1.300447 -1.154556  
C -1.901952 -1.802336 0.105374  
C -1.650274 -1.269159 1.323804  
C -0.895562 -0.000542 1.538402  
C -1.649155 1.269069 1.325284  
C -1.900326 1.803559 0.107313  
H -1.103374 2.094123 -1.881338  
H -0.906809 0.001621 -2.756107  
H -1.104032 -2.091842 -1.883487  
H -2.447218 -2.754664 0.040286  
H -1.984617 -1.805042 2.224503  
H -0.445676 -0.001100 2.544670  
H -1.981899 1.805188 2.226359  
H -2.444003 2.756862 0.043184  
el energy= -735.150526632  
zpe= -734.995828  
th energy= -734.981618  
th enthalpy= -734.980673  
free energy= -735.036989

H 0.576829 3.623773 1.229246  
el energy= -735.459353623  
zpe= -735.302462  
th energy= -735.288282  
th enthalpy= -735.287337  
free energy= -735.343273

#### TS-1

Cr -0.032115 -0.306246 0.000000  
C 1.069437 -1.143235 1.225867  
O 1.757254 -1.686785 1.990529  
C -1.049983 -1.863741 0.000000  
O -1.664310 -2.848837 0.000000  
C 1.069437 -1.143235 -1.225867  
O 1.757254 -1.686785 -1.990529  
C 0.719191 2.720285 -0.662745  
C 0.498731 1.448736 -1.390566  
C -0.799648 0.934608 -1.657513  
C -1.847251 0.776276 -0.717368  
C -1.847251 0.776276 0.717368  
C -0.799648 0.934608 1.657513  
C 0.498731 1.448736 1.390566  
C 0.719191 2.720285 0.662745

|   |           |          |           |
|---|-----------|----------|-----------|
| H | 0.840744  | 3.633628 | -1.255761 |
| H | 1.217730  | 1.257307 | -2.193551 |
| H | -1.001940 | 0.487115 | -2.634270 |
| H | -2.764766 | 0.357737 | -1.136781 |
| H | -2.764766 | 0.357737 | 1.136781  |
| H | -1.001940 | 0.487115 | 2.634270  |
| H | 1.217730  | 1.257307 | 2.193551  |
| H | 0.840744  | 3.633628 | 1.255761  |

el energy= -735.441512750  
 zpe= -735.285408  
 th energy= -735.271974  
 th enthalpy= -735.271030  
 free energy= -735.324976

#### TS-2

|    |           |           |           |
|----|-----------|-----------|-----------|
| Cr | 0.031650  | -0.435678 | 0.000000  |
| C  | -1.118756 | -1.095334 | 1.325567  |
| O  | -1.815586 | -1.559961 | 2.126999  |
| C  | -1.118756 | -1.095334 | -1.325567 |
| O  | -1.815586 | -1.559961 | -2.126999 |
| C  | 0.802321  | -2.062637 | 0.000000  |
| O  | 1.300996  | -3.119155 | 0.000000  |
| C  | -0.107239 | 1.991301  | 1.666084  |
| C  | 0.866182  | 0.900231  | 1.628280  |
| C  | 1.855015  | 0.492562  | 0.715368  |
| C  | 1.855015  | 0.492562  | -0.715368 |
| C  | 0.866182  | 0.900231  | -1.628280 |
| C  | -0.107239 | 1.991301  | -1.666084 |
| C  | -0.715823 | 2.761250  | -0.727734 |
| C  | -0.715823 | 2.761250  | 0.727734  |
| H  | -0.434934 | 2.193238  | 2.688852  |
| H  | 1.048785  | 0.500463  | 2.627305  |
| H  | 2.644903  | -0.124980 | 1.147296  |
| H  | 2.644903  | -0.124980 | -1.147296 |
| H  | 1.048785  | 0.500463  | -2.627305 |
| H  | -0.434934 | 2.193238  | -2.688852 |
| H  | -1.401083 | 3.503578  | -1.143780 |
| H  | -1.401083 | 3.503578  | 1.143780  |

el energy= -735.438707789  
 zpe= -735.282152  
 th energy= -735.268112  
 th enthalpy= -735.267168  
 free energy= -735.323658

#### TS-3

|    |           |           |           |
|----|-----------|-----------|-----------|
| Cr | -0.006947 | -0.465411 | 0.000000  |
| C  | 1.885096  | -0.495541 | 0.000000  |
| O  | 3.041372  | -0.529742 | 0.000000  |
| C  | -0.120627 | -1.861292 | 1.192153  |
| O  | -0.188594 | -2.784312 | 1.900392  |
| C  | -0.120627 | -1.861292 | -1.192153 |
| O  | -0.188594 | -2.784312 | -1.900392 |
| C  | -2.040747 | 0.355514  | 0.000000  |
| C  | -1.437737 | 0.559712  | 1.261923  |
| C  | -0.260880 | 1.276190  | 1.647386  |
| C  | 0.292575  | 2.513038  | 1.236147  |
| C  | 0.389624  | 3.148765  | 0.000000  |
| C  | 0.292575  | 2.513038  | -1.236147 |
| C  | -0.260880 | 1.276190  | -1.647386 |
| C  | -1.437737 | 0.559712  | -1.261923 |
| H  | -2.956120 | -0.236902 | 0.000000  |

|   |           |          |           |
|---|-----------|----------|-----------|
| H | -1.941619 | 0.048994 | 2.085397  |
| H | 0.055037  | 0.996192 | 2.655231  |
| H | 0.820775  | 3.032785 | 2.043943  |
| H | 0.857169  | 4.133536 | 0.000000  |
| H | 0.820775  | 3.032785 | -2.043943 |
| H | 0.055037  | 0.996192 | -2.655231 |
| H | -1.941619 | 0.048994 | -2.085397 |

el energy= -735.438733464  
 zpe= -735.283578  
 th energy= -735.269258  
 th enthalpy= -735.268314  
 free energy= -735.325448

#### TS-4

|    |           |           |           |
|----|-----------|-----------|-----------|
| Cr | -0.049483 | 0.407359  | 0.000000  |
| C  | -1.604876 | 1.423283  | 0.000000  |
| O  | -2.540292 | 2.113917  | 0.000000  |
| C  | 0.604067  | 1.576370  | 1.211574  |
| O  | 1.031591  | 2.343685  | 1.983437  |
| C  | 0.604067  | 1.576370  | -1.211574 |
| O  | 1.031591  | 2.343685  | -1.983437 |
| C  | -1.489780 | -1.660406 | -0.682170 |
| C  | -0.462133 | -2.110619 | -1.622537 |
| C  | 0.857007  | -1.807290 | -1.626242 |
| C  | 1.610869  | -0.963779 | -0.696150 |
| C  | 1.610869  | -0.963779 | 0.696150  |
| C  | 0.857007  | -1.807290 | 1.626242  |
| C  | -0.462133 | -2.110619 | 1.622537  |
| C  | -1.489780 | -1.660406 | 0.682170  |
| H  | -2.426258 | -1.352054 | -1.156421 |
| H  | -0.848708 | -2.654074 | -2.489474 |
| H  | 1.427266  | -2.128402 | -2.503310 |
| H  | 2.444397  | -0.434428 | -1.162110 |
| H  | 2.444397  | -0.434428 | 1.162110  |
| H  | 1.427266  | -2.128402 | 2.503310  |
| H  | -0.848708 | -2.654074 | 2.489474  |
| H  | -2.426258 | -1.352054 | 1.156421  |

el energy= -735.419810391  
 zpe= -735.264726  
 th energy= -735.250231  
 th enthalpy= -735.249287  
 free energy= -735.307221

#### TS-5

|    |           |           |           |
|----|-----------|-----------|-----------|
| Cr | 0.286614  | 0.340723  | 0.000000  |
| C  | 0.567717  | 1.385630  | 1.484991  |
| O  | 0.806441  | 2.083453  | 2.386040  |
| C  | -1.164475 | 1.455441  | 0.000000  |
| O  | -2.084257 | 2.176053  | 0.000000  |
| C  | 0.567717  | 1.385630  | -1.484991 |
| O  | 0.806441  | 2.083453  | -2.386040 |
| C  | 1.155307  | -1.348053 | -1.297366 |
| C  | 1.720624  | -1.325167 | 0.000000  |
| C  | 1.155307  | -1.348053 | 1.297366  |
| C  | -0.111426 | -1.881253 | 1.807480  |
| C  | -1.324712 | -1.639200 | 1.274614  |
| C  | -1.553739 | -0.919864 | 0.000000  |
| C  | -1.324712 | -1.639200 | -1.274614 |
| C  | -0.111426 | -1.881253 | -1.807480 |
| H  | 1.887712  | -1.147621 | -2.082262 |
| H  | 2.760364  | -0.980051 | 0.000000  |

|   |           |           |           |
|---|-----------|-----------|-----------|
| H | 1.887712  | -1.147621 | 2.082262  |
| H | -0.056825 | -2.388187 | 2.775053  |
| H | -2.216772 | -1.932104 | 1.836354  |
| H | -2.553408 | -0.473084 | 0.000000  |
| H | -2.216772 | -1.932104 | -1.836354 |
| H | -0.056825 | -2.388187 | -2.775053 |

el energy= -735.391210914

### PBEPBE/BS3

|    |           |           |           |
|----|-----------|-----------|-----------|
| I  |           |           |           |
| Cr | -0.053200 | -0.346894 | 0.000000  |
| C  | 1.805829  | -0.285340 | 0.000000  |
| O  | 2.965223  | -0.220184 | 0.000000  |
| C  | -0.071181 | -1.760130 | 1.195545  |
| O  | -0.060724 | -2.691312 | 1.895220  |
| C  | -0.071181 | -1.760130 | -1.195545 |
| O  | -0.060724 | -2.691312 | -1.895220 |
| C  | 0.441188  | 2.694941  | -0.664416 |
| C  | 0.270660  | 1.457270  | -1.452985 |
| C  | -0.945732 | 0.788674  | -1.653741 |
| C  | -1.984904 | 0.514299  | -0.706563 |
| C  | -1.984904 | 0.514299  | 0.706563  |
| C  | -0.945732 | 0.788674  | 1.653741  |
| C  | 0.270660  | 1.457270  | 1.452985  |
| C  | 0.441188  | 2.694941  | 0.664416  |
| H  | 0.551915  | 3.626210  | -1.230226 |
| H  | 0.977625  | 1.338947  | -2.279819 |
| H  | -1.092194 | 0.287650  | -2.614189 |
| H  | -2.851721 | 0.006855  | -1.136080 |
| H  | -2.851721 | 0.006855  | 1.136080  |
| H  | -1.092194 | 0.287650  | 2.614189  |
| H  | 0.977625  | 1.338947  | 2.279819  |
| H  | 0.551915  | 3.626210  | 1.230226  |

el energy= -1693.44464560  
zpe= -1693.287782  
th energy= -1693.273601  
th enthalpy= -1693.272656  
free energy= -1693.328616

### TS-1

|    |           |           |           |
|----|-----------|-----------|-----------|
| Cr | -0.032046 | -0.307188 | 0.000000  |
| C  | 1.073459  | -1.137281 | 1.229431  |
| O  | 1.765461  | -1.671917 | 1.997760  |
| C  | -1.047473 | -1.869240 | 0.000000  |
| O  | -1.658179 | -2.857554 | 0.000000  |
| C  | 1.073459  | -1.137281 | -1.229431 |
| O  | 1.765461  | -1.671917 | -1.997760 |
| C  | 0.711407  | 2.720574  | -0.662632 |
| C  | 0.495145  | 1.446759  | -1.387631 |
| C  | -0.802843 | 0.930888  | -1.656798 |
| C  | -1.849844 | 0.768305  | -0.717276 |
| C  | -1.849844 | 0.768305  | 0.717276  |
| C  | -0.802843 | 0.930888  | 1.656798  |
| C  | 0.495145  | 1.446759  | 1.387631  |
| C  | 0.711407  | 2.720574  | 0.662632  |
| H  | 0.828572  | 3.634289  | -1.256215 |
| H  | 1.213651  | 1.258100  | -2.192015 |
| H  | -1.004444 | 0.486021  | -2.635028 |
| H  | -2.765728 | 0.345646  | -1.136704 |
| H  | -2.765728 | 0.345646  | 1.136704  |
| H  | -1.004444 | 0.486021  | 2.635028  |
| H  | 1.213651  | 1.258100  | 2.192015  |

zpe= -735.237078  
th energy= -735.222832  
th enthalpy= -735.221888  
free energy= -735.278438

|   |          |          |          |
|---|----------|----------|----------|
| H | 0.828572 | 3.634289 | 1.256215 |
|---|----------|----------|----------|

el energy= -1693.42716645  
zpe= -1693.271070  
th energy= -1693.257640  
th enthalpy= -1693.256695  
free energy= -1693.310651

### TS-2

|    |           |           |           |
|----|-----------|-----------|-----------|
| Cr | 0.030806  | -0.440811 | 0.000000  |
| C  | -1.120408 | -1.097175 | 1.328552  |
| O  | -1.820041 | -1.555456 | 2.132630  |
| C  | -1.120408 | -1.097175 | -1.328552 |
| O  | -1.820041 | -1.555456 | -2.132630 |
| C  | 0.801887  | -2.066924 | 0.000000  |
| O  | 1.305411  | -3.122468 | 0.000000  |
| C  | -0.104260 | 1.995557  | 1.665297  |
| C  | 0.865018  | 0.901211  | 1.627115  |
| C  | 1.853518  | 0.489628  | 0.715032  |
| C  | 1.853518  | 0.489628  | -0.715032 |
| C  | 0.865018  | 0.901211  | -1.627115 |
| C  | -0.104260 | 1.995557  | -1.665297 |
| C  | -0.710238 | 2.767989  | -0.727430 |
| C  | -0.710238 | 2.767989  | 0.727430  |
| H  | -0.433153 | 2.195923  | 2.688135  |
| H  | 1.046404  | 0.502162  | 2.626914  |
| H  | 2.641887  | -0.129581 | 1.147794  |
| H  | 2.641887  | -0.129581 | -1.147794 |
| H  | 1.046404  | 0.502162  | -2.626914 |
| H  | -0.433153 | 2.195923  | -2.688135 |
| H  | -1.393571 | 3.512261  | -1.143662 |
| H  | -1.393571 | 3.512261  | 1.143662  |

el energy= -1693.42374242  
zpe= -1693.267227  
th energy= -1693.253172  
th enthalpy= -1693.252227  
free energy= -1693.308778

### TS-3

|    |           |           |           |
|----|-----------|-----------|-----------|
| Cr | -0.005235 | -0.465827 | 0.000000  |
| C  | 1.890158  | -0.486714 | 0.000000  |
| O  | 3.047395  | -0.513176 | 0.000000  |
| C  | -0.116850 | -1.864179 | 1.189832  |
| O  | -0.185139 | -2.789756 | 1.896462  |
| C  | -0.116850 | -1.864179 | -1.189832 |
| O  | -0.185139 | -2.789756 | -1.896462 |
| C  | -2.041040 | 0.348462  | 0.000000  |
| C  | -1.439756 | 0.556011  | 1.262016  |
| C  | -0.266334 | 1.277741  | 1.647330  |
| C  | 0.286538  | 2.514796  | 1.235937  |
| C  | 0.384290  | 3.149905  | 0.000000  |
| C  | 0.286538  | 2.514796  | -1.235937 |
| C  | -0.266334 | 1.277741  | -1.647330 |
| C  | -1.439756 | 0.556011  | -1.262016 |

|                           |           |           |           |
|---------------------------|-----------|-----------|-----------|
| H                         | -2.952303 | -0.250744 | 0.000000  |
| H                         | -1.940752 | 0.042452  | 2.085633  |
| H                         | 0.048759  | 1.000509  | 2.656407  |
| H                         | 0.814049  | 3.034806  | 2.044158  |
| H                         | 0.853280  | 4.134219  | 0.000000  |
| H                         | 0.814049  | 3.034806  | -2.044158 |
| H                         | 0.048759  | 1.000509  | -2.656407 |
| H                         | -1.940752 | 0.042452  | -2.085633 |
| el energy= -1693.42403373 |           |           |           |
| zpe= -1693.268917         |           |           |           |
| th energy= -1693.254572   |           |           |           |
| th enthalpy= -1693.253628 |           |           |           |
| free energy= -1693.310894 |           |           |           |

#### TS-4

|    |           |           |           |
|----|-----------|-----------|-----------|
| Cr | -0.047008 | 0.402558  | 0.000000  |
| C  | -1.612808 | 1.405349  | 0.000000  |
| O  | -2.557935 | 2.083911  | 0.000000  |
| C  | 0.600526  | 1.575298  | 1.210908  |
| O  | 1.026621  | 2.342092  | 1.985652  |
| C  | 0.600526  | 1.575298  | -1.210908 |
| O  | 1.026621  | 2.342092  | -1.985652 |
| C  | -1.485582 | -1.660661 | -0.682533 |
| C  | -0.459068 | -2.094038 | -1.630019 |
| C  | 0.860803  | -1.792443 | -1.632876 |
| C  | 1.619248  | -0.962174 | -0.696216 |
| C  | 1.619248  | -0.962174 | 0.696216  |
| C  | 0.860803  | -1.792443 | 1.632876  |
| C  | -0.459068 | -2.094038 | 1.630019  |
| C  | -1.485582 | -1.660661 | 0.682533  |
| H  | -2.427169 | -1.362404 | -1.153098 |
| H  | -0.847774 | -2.621078 | -2.506194 |
| H  | 1.426316  | -2.098301 | -2.518527 |
| H  | 2.454366  | -0.433228 | -1.160250 |
| H  | 2.454366  | -0.433228 | 1.160250  |
| H  | 1.426316  | -2.098301 | 2.518527  |
| H  | -0.847774 | -2.621078 | 2.506194  |

#### B3LYP/BS1

I

|    |           |           |           |
|----|-----------|-----------|-----------|
| Cr | -0.035449 | -0.382273 | 0.000000  |
| C  | 1.832639  | -0.319327 | 0.000000  |
| O  | 2.982417  | -0.232082 | 0.000000  |
| C  | -0.065785 | -1.769675 | 1.242922  |
| O  | -0.078972 | -2.654839 | 1.984478  |
| C  | -0.065785 | -1.769675 | -1.242922 |
| O  | -0.078972 | -2.654839 | -1.984478 |
| C  | 0.449469  | 2.704125  | -0.664897 |
| C  | 0.240104  | 1.492522  | -1.488779 |
| C  | -0.957322 | 0.804268  | -1.654088 |
| C  | -1.992225 | 0.503654  | -0.702763 |
| C  | -1.992225 | 0.503654  | 0.702763  |
| C  | -0.957322 | 0.804268  | 1.654088  |
| C  | 0.240104  | 1.492522  | 1.488779  |
| C  | 0.449469  | 2.704125  | 0.664897  |
| H  | 0.601263  | 3.634446  | -1.217038 |
| H  | 0.926800  | 1.391698  | -2.330651 |
| H  | -1.091674 | 0.282646  | -2.601922 |
| H  | -2.852253 | -0.005862 | -1.135668 |
| H  | -2.852253 | -0.005862 | 1.135668  |
| H  | -1.091674 | 0.282646  | 2.601922  |
| H  | 0.926800  | 1.391698  | 2.330651  |

|                           |           |           |          |
|---------------------------|-----------|-----------|----------|
| H                         | -2.427169 | -1.362404 | 1.153098 |
| el energy= -1693.40372685 |           |           |          |
| zpe= -1693.248588         |           |           |          |
| th energy= -1693.234081   |           |           |          |
| th enthalpy= -1693.233136 |           |           |          |
| free energy= -1693.291160 |           |           |          |

#### TS-5

|                           |           |           |           |
|---------------------------|-----------|-----------|-----------|
| Cr                        | 0.287456  | 0.344507  | 0.000000  |
| C                         | 0.567250  | 1.388676  | 1.487105  |
| O                         | 0.805147  | 2.084136  | 2.391674  |
| C                         | -1.167191 | 1.456020  | 0.000000  |
| O                         | -2.092688 | 2.170995  | 0.000000  |
| C                         | 0.567250  | 1.388676  | -1.487105 |
| O                         | 0.805147  | 2.084136  | -2.391674 |
| C                         | 1.155661  | -1.347216 | -1.297602 |
| C                         | 1.720189  | -1.323798 | 0.000000  |
| C                         | 1.155661  | -1.347216 | 1.297602  |
| C                         | -0.109395 | -1.882700 | 1.808768  |
| C                         | -1.322368 | -1.644393 | 1.274489  |
| C                         | -1.550382 | -0.924564 | 0.000000  |
| C                         | -1.322368 | -1.644393 | -1.274489 |
| C                         | -0.109395 | -1.882700 | -1.808768 |
| H                         | 1.888581  | -1.145401 | -2.081880 |
| H                         | 2.759261  | -0.975820 | 0.000000  |
| H                         | 1.888581  | -1.145401 | 2.081880  |
| H                         | -0.053330 | -2.388493 | 2.776957  |
| H                         | -2.214510 | -1.940115 | 1.834803  |
| H                         | -2.550013 | -0.476839 | 0.000000  |
| H                         | -2.214510 | -1.940115 | -1.834803 |
| H                         | -0.053330 | -2.388493 | -2.776957 |
| el energy= -1693.37670695 |           |           |           |
| zpe= -1693.222555         |           |           |           |
| th energy= -1693.208321   |           |           |           |
| th enthalpy= -1693.207376 |           |           |           |
| free energy= -1693.263862 |           |           |           |

|                           |          |          |          |
|---------------------------|----------|----------|----------|
| H                         | 0.601263 | 3.634446 | 1.217038 |
| el energy= -735.924800456 |          |          |          |
| zpe= -735.763519          |          |          |          |
| th energy= -735.749249    |          |          |          |
| th enthalpy= -735.748305  |          |          |          |
| free energy= -735.804530  |          |          |          |

#### TS-1

|    |           |           |           |
|----|-----------|-----------|-----------|
| Cr | 0.341122  | -0.000005 | -0.006211 |
| C  | 1.131231  | -1.261507 | 1.112532  |
| O  | 1.607233  | -2.057546 | 1.800677  |
| C  | 1.901723  | 0.000226  | -1.042564 |
| O  | 2.852010  | 0.000335  | -1.695059 |
| C  | 1.131330  | 1.260829  | 1.113173  |
| O  | 1.607434  | 2.056539  | 1.801622  |
| C  | -2.723069 | 0.662594  | 0.682656  |
| C  | -1.463656 | 1.417833  | 0.461387  |
| C  | -0.927607 | 1.659633  | -0.824552 |
| C  | -0.743194 | 0.715972  | -1.865330 |
| C  | -0.743246 | -0.715054 | -1.865643 |
| C  | -0.927835 | -1.659164 | -0.825310 |
| C  | -1.463951 | -1.418014 | 0.460687  |
| C  | -2.723194 | -0.662656 | 0.682376  |

|                           |           |           |           |
|---------------------------|-----------|-----------|-----------|
| H                         | -3.640489 | 1.244758  | 0.802449  |
| H                         | -1.298383 | 2.235334  | 1.165472  |
| H                         | -0.458756 | 2.625188  | -1.017295 |
| H                         | -0.307644 | 1.135064  | -2.771661 |
| H                         | -0.307746 | -1.133750 | -2.772180 |
| H                         | -0.459050 | -2.624666 | -1.018472 |
| H                         | -1.298774 | -2.235903 | 1.164341  |
| H                         | -3.640708 | -1.244699 | 0.802004  |
| el energy= -735.903610497 |           |           |           |
| zpe= -735.743141          |           |           |           |
| th energy= -735.729690    |           |           |           |
| th enthalpy= -735.728746  |           |           |           |
| free energy= -735.782650  |           |           |           |

#### TS-2

|                           |           |           |           |
|---------------------------|-----------|-----------|-----------|
| Cr                        | -0.025772 | 0.470278  | 0.000000  |
| C                         | 1.181707  | 1.044266  | 1.338225  |
| O                         | 1.920429  | 1.407140  | 2.142091  |
| C                         | 1.181707  | 1.044266  | -1.338225 |
| O                         | 1.920429  | 1.407140  | -2.142091 |
| C                         | -0.799430 | 2.122385  | 0.000000  |
| O                         | -1.311520 | 3.160367  | 0.000000  |
| C                         | 0.053350  | -1.978102 | 1.668835  |
| C                         | -0.905449 | -0.865136 | 1.631605  |
| C                         | -1.877479 | -0.441307 | 0.716322  |
| C                         | -1.877479 | -0.441307 | -0.716322 |
| C                         | -0.905449 | -0.865136 | -1.631605 |
| C                         | 0.053350  | -1.978102 | -1.668835 |
| C                         | 0.652325  | -2.751122 | -0.730938 |
| C                         | 0.652325  | -2.751122 | 0.730938  |
| H                         | 0.369110  | -2.189996 | 2.690421  |
| H                         | -1.086016 | -0.470028 | 2.630013  |
| H                         | -2.645989 | 0.201911  | 1.142481  |
| H                         | -2.645989 | 0.201911  | -1.142481 |
| H                         | -1.086016 | -0.470028 | -2.630013 |
| H                         | 0.369110  | -2.189996 | -2.690421 |
| H                         | 1.326381  | -3.502558 | -1.141791 |
| H                         | 1.326381  | -3.502558 | 1.141791  |
| el energy= -735.909824703 |           |           |           |
| zpe= -735.748805          |           |           |           |
| th energy= -735.734868    |           |           |           |
| th enthalpy= -735.733924  |           |           |           |
| free energy= -735.790018  |           |           |           |

#### TS-3

|    |           |           |           |
|----|-----------|-----------|-----------|
| Cr | -0.001775 | -0.492233 | 0.000000  |
| C  | 1.902869  | -0.455781 | 0.000000  |
| O  | 3.050207  | -0.403907 | 0.000000  |
| C  | -0.094506 | -1.869757 | 1.247442  |
| O  | -0.148853 | -2.742660 | 2.001289  |
| C  | -0.094506 | -1.869757 | -1.247442 |
| O  | -0.148853 | -2.742660 | -2.001289 |
| C  | -2.052299 | 0.321442  | 0.000000  |
| C  | -1.451614 | 0.530001  | 1.260883  |
| C  | -0.295906 | 1.268778  | 1.666631  |
| C  | 0.267675  | 2.495541  | 1.240222  |
| C  | 0.372565  | 3.124963  | 0.000000  |
| C  | 0.267675  | 2.495541  | -1.240222 |
| C  | -0.295906 | 1.268778  | -1.666631 |
| C  | -1.451614 | 0.530001  | -1.260883 |
| H  | -2.953733 | -0.287221 | 0.000000  |

|                           |           |          |           |
|---------------------------|-----------|----------|-----------|
| H                         | -1.948908 | 0.006921 | 2.077570  |
| H                         | -0.001970 | 1.009183 | 2.683288  |
| H                         | 0.791306  | 3.020636 | 2.043697  |
| H                         | 0.848878  | 4.102648 | 0.000000  |
| H                         | 0.791306  | 3.020636 | -2.043697 |
| H                         | -0.001970 | 1.009183 | -2.683288 |
| H                         | -1.948908 | 0.006921 | -2.077570 |
| el energy= -735.905142409 |           |          |           |
| zpe= -735.745941          |           |          |           |
| th energy= -735.731683    |           |          |           |
| th enthalpy= -735.730739  |           |          |           |
| free energy= -735.787480  |           |          |           |

#### TS-4

|                           |           |           |           |
|---------------------------|-----------|-----------|-----------|
| Cr                        | -0.048095 | 0.485602  | 0.000000  |
| C                         | -1.624576 | 1.496059  | 0.000000  |
| O                         | -2.581303 | 2.142538  | 0.000000  |
| C                         | 0.631175  | 1.605856  | 1.273791  |
| O                         | 1.064493  | 2.302625  | 2.093391  |
| C                         | 0.631175  | 1.605856  | -1.273791 |
| O                         | 1.064493  | 2.302625  | -2.093391 |
| C                         | -1.498344 | -1.695306 | -0.678574 |
| C                         | -0.457789 | -2.180671 | -1.600996 |
| C                         | 0.850909  | -1.854802 | -1.607239 |
| C                         | 1.583630  | -0.960843 | -0.693606 |
| C                         | 1.583630  | -0.960843 | 0.693606  |
| C                         | 0.850909  | -1.854802 | 1.607239  |
| C                         | -0.457789 | -2.180671 | 1.600996  |
| C                         | -1.498344 | -1.695306 | 0.678574  |
| H                         | -2.417018 | -1.361196 | -1.164387 |
| H                         | -0.830506 | -2.785332 | -2.429317 |
| H                         | 1.444720  | -2.219361 | -2.447643 |
| H                         | 2.405445  | -0.426073 | -1.167082 |
| H                         | 2.405445  | -0.426073 | 1.167082  |
| H                         | 1.444720  | -2.219361 | 2.447643  |
| H                         | -0.830506 | -2.785332 | 2.429317  |
| H                         | -2.417018 | -1.361196 | 1.164387  |
| el energy= -735.895186163 |           |           |           |
| zpe= -735.735587          |           |           |           |
| th energy= -735.721229    |           |           |           |
| th enthalpy= -735.720285  |           |           |           |
| free energy= -735.777570  |           |           |           |

#### TS-5

|    |           |           |           |
|----|-----------|-----------|-----------|
| Cr | 0.407284  | 0.000281  | -0.283105 |
| C  | 1.408959  | -1.543744 | -0.553286 |
| O  | 2.067980  | -2.455405 | -0.807352 |
| C  | 1.435640  | 0.000869  | 1.245006  |
| O  | 2.085939  | 0.001333  | 2.203274  |
| C  | 1.405875  | 1.546019  | -0.552970 |
| O  | 2.062961  | 2.459089  | -0.807108 |
| C  | -1.304727 | 1.293382  | -1.167309 |
| C  | -1.269130 | -0.001208 | -1.733014 |
| C  | -1.303501 | -1.295775 | -1.167416 |
| C  | -1.924049 | -1.790642 | 0.076975  |
| C  | -1.698881 | -1.257905 | 1.287107  |
| C  | -0.912060 | -0.000272 | 1.496544  |
| C  | -1.701710 | 1.255669  | 1.286677  |
| C  | -1.927348 | 1.787622  | 0.076410  |
| H  | -1.082105 | 2.079890  | -1.888600 |
| H  | -0.857651 | -0.001067 | -2.747373 |

H -1.079995 -2.082191 -1.888548  
H -2.507490 -2.708625 -0.009598  
H -2.106822 -1.745889 2.174831  
H -0.505444 0.000392 2.511786  
H -2.111672 1.742465 2.174129  
H -2.513093 2.704061 -0.010981

el energy= -735.850711911

zpe= -735.692071

th energy= -735.677972

th enthalpy= -735.677028

free energy= -735.733629

#### TS-6

Cr 0.770221 -0.039960 -0.271463  
C 0.334336 0.149373 1.520382  
O 0.089121 0.189063 2.646979  
C 1.626305 -1.650657 0.222483  
O 2.121593 -2.628095 0.575895  
C 2.255779 1.030721 -0.090786  
O 3.176480 1.730454 -0.052516  
C -2.008754 1.633406 0.441961  
C -0.763170 1.767395 -0.339997  
C -0.385107 1.201158 -1.563663  
C -0.533652 -0.161358 -2.006025  
C -1.020795 -1.312062 -1.385244  
C -2.023482 -1.588907 -0.362741  
C -2.814631 -0.811784 0.422505  
C -2.865155 0.616739 0.695179  
H -2.283376 2.581522 0.906724  
H -0.286153 2.730224 -0.161690  
H 0.265314 1.805459 -2.194522  
H 0.076396 -0.378338 -2.887186  
H -0.709358 -2.219208 -1.901046  
H -2.191453 -2.660179 -0.251174  
H -3.539823 -1.373058 1.012362  
H -3.724438 0.897126 1.304440

el energy= -735.893854093

#### 2

Cr -0.875553 0.000033 -0.304650  
C -0.184098 -0.000025 1.409215  
O 0.232186 0.000032 2.484271  
C -2.009346 1.425034 0.142342  
O -2.676839 2.326929 0.409551  
C -2.009994 -1.424474 0.142151  
O -2.677856 -2.326127 0.409267  
C 2.034607 -1.663496 0.043727  
C 0.883018 -1.630800 -0.858883  
C 0.433302 -0.722114 -1.817720  
C 0.433412 0.721329 -1.817999  
C 0.883440 1.630420 -0.859707  
C 2.034831 1.663298 0.043087  
C 2.877753 0.726626 0.547517  
C 2.877693 -0.726773 0.547749  
H 2.266229 -2.684222 0.349721  
H 0.476162 -2.628785 -1.018201  
H -0.200522 -1.155691 -2.595440  
H -0.200430 1.154615 -2.595877  
H 0.476726 2.628378 -1.019513  
H 2.266478 2.684105 0.348803  
H 3.690494 1.140884 1.144132

H 3.690502 -1.140900 1.144364

el energy= -735.896316253

zpe= -735.735743

th energy= -735.720950

th enthalpy= -735.720006

free energy= -735.778222

#### TS-7

Cr 0.318661 0.012708 -0.021700  
C 1.849663 -1.078847 0.129143  
O 2.823619 -1.687016 0.207458  
C 1.643609 1.319164 -0.154432  
O 2.507891 2.083500 -0.231089  
C 0.142255 -0.026245 1.847405  
O -0.027948 -0.085227 2.985157  
C -2.607066 0.574073 0.480494  
C -1.486483 1.530499 0.241620  
C -0.800639 1.645639 -0.996660  
C -0.927165 0.451001 -1.777487  
C -0.027340 -0.631596 -2.029848  
C -0.448639 -1.721019 -1.162125  
C -1.326390 -1.575774 -0.049334  
C -2.551945 -0.754597 0.264182  
H -3.551777 1.017987 0.800396  
H -1.409106 2.368861 0.933400  
H -0.181966 2.508404 -1.222255  
H -1.911944 0.038156 -1.597793  
H 0.847821 -0.685478 -2.667711  
H 0.125531 -2.646770 -1.191882  
H -1.288041 -2.456338 0.596325  
H -3.466041 -1.333666 0.420364

el energy= -735.855943756

zpe= -735.695164

th energy= -735.681422

th enthalpy= -735.680477

free energy= -735.735298

#### 3

Cr -0.363077 -0.038963 0.008833  
C -0.112107 1.792578 0.389106  
O 0.042413 2.907343 0.627057  
C -1.507364 0.337620 -1.413220  
O -2.227794 0.557320 -2.288030  
C -1.879418 -0.020881 1.084190  
O -2.823251 -0.029887 1.749166  
C 0.560955 -1.476845 1.368364  
C -0.111287 -2.187772 0.290614  
C 0.052310 -1.845979 -1.067442  
C 1.290342 -1.087685 -1.199598  
C 1.559833 0.251059 -1.451941  
C 2.630783 0.727765 -0.553136  
C 2.562629 0.328500 0.741468  
C 1.414310 -0.332422 1.451301  
H 0.106474 -1.711466 2.331378  
H -0.905092 -2.864334 0.600858  
H -0.589009 -2.232155 -1.853636  
H 2.059569 -1.538673 -0.578366  
H 1.142634 0.860212 -2.248379  
H 3.456825 1.343829 -0.905338  
H 3.357654 0.642205 1.420208  
H 1.387937 0.041646 2.477490



el energy= -735.890534470  
 zpe= -735.728992  
 th energy= -735.715338  
 th enthalpy= -735.714394  
 free energy= -735.769016

#### TS-8

|    |           |           |           |
|----|-----------|-----------|-----------|
| Cr | 1.235836  | 0.000514  | -0.418289 |
| C  | 3.037536  | 0.001662  | -0.923446 |
| O  | 4.148938  | 0.002545  | -1.236316 |
| C  | 1.592976  | 1.286686  | 0.834359  |
| O  | 1.800183  | 2.100756  | 1.631464  |
| C  | 1.593908  | -1.288665 | 0.831032  |
| O  | 1.802123  | -2.104938 | 1.625613  |
| C  | -3.917275 | 0.673657  | -0.212391 |
| C  | -2.891909 | 1.603792  | 0.276842  |
| C  | -1.568636 | 1.618254  | 0.030825  |
| C  | -0.808819 | 0.689278  | -0.825494 |
| C  | -0.808551 | -0.689265 | -0.825043 |
| C  | -1.568377 | -1.617915 | 0.031628  |
| C  | -2.891713 | -1.603598 | 0.277353  |
| C  | -3.917216 | -0.673823 | -0.212224 |
| H  | -4.838459 | 1.161127  | -0.539240 |
| H  | -3.285923 | 2.439921  | 0.859216  |
| H  | -0.992308 | 2.455181  | 0.426252  |
| H  | -0.274793 | 1.187028  | -1.661785 |
| H  | -0.274122 | -1.187278 | -1.660900 |
| H  | -0.991997 | -2.454534 | 0.427616  |
| H  | -3.285606 | -2.439607 | 0.859996  |
| H  | -4.838350 | -1.161452 | -0.538945 |

el energy= -735.879188426  
 zpe= -735.720927  
 th energy= -735.705606

#### B3LYP/BS3

|    |           |           |           |
|----|-----------|-----------|-----------|
| I  |           |           |           |
| Cr | -0.034015 | -0.378288 | 0.000000  |
| C  | 1.848810  | -0.338516 | 0.000000  |
| O  | 2.994030  | -0.277392 | 0.000000  |
| C  | -0.079040 | -1.774986 | 1.243457  |
| O  | -0.102912 | -2.662949 | 1.972985  |
| C  | -0.079040 | -1.774986 | -1.243457 |
| O  | -0.102912 | -2.662949 | -1.972985 |
| C  | 0.463123  | 2.701962  | -0.660579 |
| C  | 0.235515  | 1.505227  | -1.489244 |
| C  | -0.954914 | 0.818954  | -1.647573 |
| C  | -1.981159 | 0.515159  | -0.699479 |
| C  | -1.981159 | 0.515159  | 0.699479  |
| C  | -0.954914 | 0.818954  | 1.647573  |
| C  | 0.235515  | 1.505227  | 1.489244  |
| C  | 0.463123  | 2.701962  | 0.660579  |
| H  | 0.634567  | 3.625625  | -1.205487 |
| H  | 0.911115  | 1.412145  | -2.332814 |
| H  | -1.097027 | 0.314886  | -2.596407 |
| H  | -2.840870 | 0.017612  | -1.130865 |
| H  | -2.840870 | 0.017612  | 1.130865  |
| H  | -1.097027 | 0.314886  | 2.596407  |
| H  | 0.911115  | 1.412145  | 2.332814  |
| H  | 0.634567  | 3.625625  | 1.205487  |

el energy= -1694.40027290  
 zpe= -1694.239252  
 th energy= -1694.225023

th enthalpy= -735.704662  
 free energy= -735.764971

#### 4

|    |           |           |           |
|----|-----------|-----------|-----------|
| Cr | -1.046925 | -0.207990 | -0.316170 |
| C  | -2.583519 | -1.207389 | 0.019484  |
| O  | -3.541265 | -1.831999 | 0.191552  |
| C  | -0.781065 | 0.035990  | 1.476656  |
| O  | -0.593937 | 0.201510  | 2.606807  |
| C  | -2.023417 | 1.344409  | -0.410547 |
| O  | -2.622719 | 2.335000  | -0.452931 |
| C  | 3.393973  | -1.093910 | -0.037783 |
| C  | 2.102386  | -1.786513 | -0.048043 |
| C  | 0.980295  | -1.412613 | -0.697564 |
| C  | 0.708307  | -0.212194 | -1.502490 |
| C  | 0.838959  | 1.106135  | -1.116961 |
| C  | 1.537113  | 1.660927  | 0.048839  |
| C  | 2.711370  | 1.284010  | 0.599852  |
| C  | 3.636792  | 0.205428  | 0.232110  |
| H  | 4.261023  | -1.743679 | -0.170747 |
| H  | 2.081792  | -2.747840 | 0.469711  |
| H  | 0.142446  | -2.140567 | -0.680301 |
| H  | 0.246267  | -0.395209 | -2.482879 |
| H  | 0.475841  | 1.851000  | -1.825844 |
| H  | 1.077906  | 2.565240  | 0.449254  |
| H  | 3.088371  | 1.926008  | 1.398454  |
| H  | 4.688739  | 0.495039  | 0.285700  |

el energy= -735.885236129

zpe= -735.726604

th energy= -735.711320

th enthalpy= -735.710376

free energy= -735.770560

th enthalpy= -1694.224079

free energy= -1694.280321

#### TS-1

|    |           |           |           |
|----|-----------|-----------|-----------|
| Cr | -0.010765 | -0.336861 | 0.000000  |
| C  | 1.111656  | -1.138693 | 1.265502  |
| O  | 1.796176  | -1.622768 | 2.051621  |
| C  | -1.056502 | -1.905543 | 0.000000  |
| O  | -1.698322 | -2.855859 | 0.000000  |
| C  | 1.111656  | -1.138693 | -1.265502 |
| O  | 1.796176  | -1.622768 | -2.051621 |
| C  | 0.699371  | 2.713250  | -0.658101 |
| C  | 0.459314  | 1.464471  | -1.413867 |
| C  | -0.824398 | 0.939174  | -1.651384 |
| C  | -1.858826 | 0.756486  | -0.712153 |
| C  | -1.858826 | 0.756486  | 0.712153  |
| C  | -0.824398 | 0.939174  | 1.651384  |
| C  | 0.459314  | 1.464471  | 1.413867  |
| C  | 0.699371  | 2.713250  | 0.658101  |
| H  | 0.836456  | 3.624074  | -1.234854 |
| H  | 1.155158  | 1.300575  | -2.230245 |
| H  | -1.025377 | 0.492765  | -2.618764 |
| H  | -2.766373 | 0.339007  | -1.130388 |
| H  | -2.766373 | 0.339007  | 1.130388  |
| H  | -1.025377 | 0.492765  | 2.618764  |
| H  | 1.155158  | 1.300575  | 2.230245  |
| H  | 0.836456  | 3.624074  | 1.234854  |

el energy= -1694.37967640  
 zpe= -1694.219424  
 th energy= -1694.206054  
 th enthalpy= -1694.205110  
 free energy= -1694.258914

zpe= -1694.222806  
 th energy= -1694.208581  
 th enthalpy= -1694.207637  
 free energy= -1694.264403

#### TS-2

|    |           |           |           |
|----|-----------|-----------|-----------|
| Cr | 0.033393  | -0.473542 | 0.000000  |
| C  | -1.175890 | -1.068746 | 1.343592  |
| O  | -1.904333 | -1.448124 | 2.140536  |
| C  | -1.175890 | -1.068746 | -1.343592 |
| O  | -1.904333 | -1.448124 | -2.140536 |
| C  | 0.823065  | -2.125339 | 0.000000  |
| O  | 1.336768  | -3.156805 | 0.000000  |
| C  | -0.073686 | 1.985608  | 1.658650  |
| C  | 0.895900  | 0.891819  | 1.622998  |
| C  | 1.866696  | 0.476067  | 0.712125  |
| C  | 1.866696  | 0.476067  | -0.712125 |
| C  | 0.895900  | 0.891819  | -1.622998 |
| C  | -0.073686 | 1.985608  | -1.658650 |
| C  | -0.675350 | 2.750799  | -0.727054 |
| C  | -0.675350 | 2.750799  | 0.727054  |
| H  | -0.392055 | 2.191625  | 2.674065  |
| H  | 1.085451  | 0.510745  | 2.618384  |
| H  | 2.651019  | -0.135576 | 1.139720  |
| H  | 2.651019  | -0.135576 | -1.139720 |
| H  | 1.085451  | 0.510745  | -2.618384 |
| H  | -0.392055 | 2.191625  | -2.674065 |
| H  | -1.352761 | 3.490664  | -1.137102 |
| H  | -1.352761 | 3.490664  | 1.137102  |

el energy= -1694.38615001  
 zpe= -1694.225443  
 th energy= -1694.211541  
 th enthalpy= -1694.210597  
 free energy= -1694.266726

#### TS-3

|    |           |           |           |
|----|-----------|-----------|-----------|
| Cr | -0.000802 | -0.483822 | 0.000000  |
| C  | 1.921263  | -0.469347 | 0.000000  |
| O  | 3.063093  | -0.447516 | 0.000000  |
| C  | -0.104416 | -1.872293 | 1.245942  |
| O  | -0.168085 | -2.751537 | 1.983148  |
| C  | -0.104416 | -1.872293 | -1.245942 |
| O  | -0.168085 | -2.751537 | -1.983148 |
| C  | -2.047343 | 0.335571  | 0.000000  |
| C  | -1.457962 | 0.550816  | 1.257022  |
| C  | -0.311760 | 1.286981  | 1.668379  |
| C  | 0.282235  | 2.487653  | 1.236508  |
| C  | 0.411143  | 3.103621  | 0.000000  |
| C  | 0.282235  | 2.487653  | -1.236508 |
| C  | -0.311760 | 1.286981  | -1.668379 |
| C  | -1.457962 | 0.550816  | -1.257022 |
| H  | -2.950820 | -0.258736 | 0.000000  |
| H  | -1.962567 | 0.042184  | 2.069438  |
| H  | -0.032696 | 1.035387  | 2.684781  |
| H  | 0.812238  | 3.000785  | 2.034703  |
| H  | 0.913203  | 4.061506  | 0.000000  |
| H  | 0.812238  | 3.000785  | -2.034703 |
| H  | -0.032696 | 1.035387  | -2.684781 |
| H  | -1.962567 | 0.042184  | -2.069438 |

el energy= -1694.38174046

#### TS-4

|    |           |           |           |
|----|-----------|-----------|-----------|
| Cr | -0.047402 | 0.486276  | 0.000000  |
| C  | -1.628844 | 1.500719  | 0.000000  |
| O  | -2.577757 | 2.149034  | 0.000000  |
| C  | 0.633581  | 1.616721  | 1.271819  |
| O  | 1.065177  | 2.321841  | 2.077800  |
| C  | 0.633581  | 1.616721  | -1.271819 |
| O  | 1.065177  | 2.321841  | -2.077800 |
| C  | -1.490859 | -1.702756 | -0.674308 |
| C  | -0.457275 | -2.182065 | -1.596569 |
| C  | 0.844319  | -1.862963 | -1.602642 |
| C  | 1.578875  | -0.981296 | -0.689989 |
| C  | 1.578875  | -0.981296 | 0.689989  |
| C  | 0.844319  | -1.862963 | 1.602642  |
| C  | -0.457275 | -2.182065 | 1.596569  |
| C  | -1.490859 | -1.702756 | 0.674308  |
| H  | -2.408403 | -1.380100 | -1.155836 |
| H  | -0.830877 | -2.775549 | -2.424185 |
| H  | 1.431234  | -2.221206 | -2.442314 |
| H  | 2.401161  | -0.457328 | -1.160062 |
| H  | 2.401161  | -0.457328 | 1.160062  |
| H  | 1.431234  | -2.221206 | 2.442314  |
| H  | -0.830877 | -2.775549 | 2.424185  |
| H  | -2.408403 | -1.380100 | 1.155836  |

el energy= -1694.36933926  
 zpe= -1694.210053  
 th energy= -1694.195726  
 th enthalpy= -1694.194782  
 free energy= -1694.252119

#### TS-5

|    |           |           |           |
|----|-----------|-----------|-----------|
| Cr | 0.291505  | 0.407711  | 0.000000  |
| C  | 0.562595  | 1.429376  | 1.541391  |
| O  | 0.797388  | 2.085923  | 2.452658  |
| C  | -1.243284 | 1.438605  | 0.000000  |
| O  | -2.197460 | 2.085203  | 0.000000  |
| C  | 0.562595  | 1.429376  | -1.541391 |
| O  | 0.797388  | 2.085923  | -2.452658 |
| C  | 1.162852  | -1.327895 | -1.289829 |
| C  | 1.720142  | -1.293120 | 0.000000  |
| C  | 1.162852  | -1.327895 | 1.289829  |
| C  | -0.084310 | -1.925359 | 1.787277  |
| C  | -1.285489 | -1.702019 | 1.255483  |
| C  | -1.494593 | -0.924385 | 0.000000  |
| C  | -1.285489 | -1.702019 | -1.255483 |
| C  | -0.084310 | -1.925359 | -1.787277 |
| H  | 1.885554  | -1.120936 | -2.070031 |
| H  | 2.741399  | -0.916700 | 0.000000  |
| H  | 1.885554  | -1.120936 | 2.070031  |
| H  | -0.004828 | -2.497716 | 2.705308  |
| H  | -2.169488 | -2.095219 | 1.747711  |
| H  | -2.499885 | -0.512870 | 0.000000  |
| H  | -2.169488 | -2.095219 | -1.747711 |
| H  | -0.004828 | -2.497716 | -2.705308 |

el energy= -1694.32779678  
 zpe= -1694.169431

th energy= -1694.155391  
th enthalpy= -1694.154447

### B3LYP/BS4

I

|    |           |           |           |
|----|-----------|-----------|-----------|
| Cr | -0.036354 | -0.374770 | 0.000000  |
| C  | 1.838430  | -0.339988 | 0.000000  |
| O  | 2.992106  | -0.282039 | 0.000000  |
| C  | -0.078574 | -1.768834 | 1.240402  |
| O  | -0.098502 | -2.662069 | 1.975804  |
| C  | -0.078574 | -1.768834 | -1.240402 |
| O  | -0.098502 | -2.662069 | -1.975804 |
| C  | 0.465987  | 2.706175  | -0.665259 |
| C  | 0.246162  | 1.497008  | -1.489011 |
| C  | -0.954929 | 0.814447  | -1.655044 |
| C  | -1.990049 | 0.516449  | -0.703167 |
| C  | -1.990049 | 0.516449  | 0.703167  |
| C  | -0.954929 | 0.814447  | 1.655044  |
| C  | 0.246162  | 1.497008  | 1.489011  |
| C  | 0.465987  | 2.706175  | 0.665259  |
| H  | 0.628940  | 3.637754  | -1.215773 |
| H  | 0.933303  | 1.394145  | -2.332687 |
| H  | -1.096165 | 0.302256  | -2.608970 |
| H  | -2.857110 | 0.016284  | -1.137136 |
| H  | -2.857110 | 0.016284  | 1.137136  |
| H  | -1.096165 | 0.302256  | 2.608970  |
| H  | 0.933303  | 1.394145  | 2.332687  |
| H  | 0.628940  | 3.637754  | 1.215773  |

el energy= -736.034420863

zpe= -735.873915

th energy= -735.859657

th enthalpy= -735.858713

free energy= -735.914916

TS-1

|    |           |           |           |
|----|-----------|-----------|-----------|
| Cr | 0.335402  | 0.000000  | 0.010538  |
| C  | 1.136467  | 1.259857  | -1.108913 |
| O  | 1.626560  | 2.048746  | -1.799301 |
| C  | 1.898818  | 0.000046  | 1.052904  |
| O  | 2.855410  | 0.000088  | 1.699756  |
| C  | 1.136457  | -1.259964 | -1.108796 |
| O  | 1.626561  | -2.048921 | -1.799098 |
| C  | -2.720064 | -0.663030 | -0.698444 |
| C  | -1.461914 | -1.416360 | -0.465358 |
| C  | -0.933746 | -1.659549 | 0.824563  |
| C  | -0.756241 | -0.715766 | 1.866087  |
| C  | -0.756232 | 0.715912  | 1.866037  |
| C  | -0.933731 | 1.659619  | 0.824440  |
| C  | -1.461904 | 1.416330  | -0.465459 |
| C  | -2.720060 | 0.662991  | -0.698485 |
| H  | -3.638524 | -1.244467 | -0.831008 |
| H  | -1.294083 | -2.235276 | -1.170113 |
| H  | -0.476616 | -2.631260 | 1.023997  |
| H  | -0.333296 | -1.136441 | 2.779782  |
| H  | -0.333281 | 1.136646  | 2.779701  |
| H  | -0.476589 | 2.631341  | 1.023797  |
| H  | -1.294072 | 2.235191  | -1.170279 |
| H  | -3.638517 | 1.244424  | -0.831086 |

el energy= -736.013725065

zpe= -735.854048

th energy= -735.840616

th enthalpy= -735.839672

free energy= -1694.210816

free energy= -735.893538

TS-2

|    |           |           |           |
|----|-----------|-----------|-----------|
| Cr | 0.031299  | -0.467937 | 0.000000  |
| C  | -1.178536 | -1.056240 | 1.337171  |
| O  | -1.916271 | -1.435046 | 2.137196  |
| C  | -1.178536 | -1.056240 | -1.337171 |
| O  | -1.916271 | -1.435046 | -2.137196 |
| C  | 0.811767  | -2.120634 | 0.000000  |
| O  | 1.324816  | -3.160965 | 0.000000  |
| C  | -0.064806 | 1.982354  | 1.667714  |
| C  | 0.896190  | 0.870917  | 1.629042  |
| C  | 1.877206  | 0.457996  | 0.716000  |
| C  | 1.877206  | 0.457996  | -0.716000 |
| C  | 0.896190  | 0.870917  | -1.629042 |
| C  | -0.064806 | 1.982354  | -1.667714 |
| C  | -0.664711 | 2.757702  | -0.730845 |
| C  | -0.664711 | 2.757702  | 0.730845  |
| H  | -0.380036 | 2.196627  | 2.691250  |
| H  | 1.082783  | 0.482365  | 2.630969  |
| H  | 2.661533  | -0.166575 | 1.145881  |
| H  | 2.661533  | -0.166575 | -1.145881 |
| H  | 1.082783  | 0.482365  | -2.630969 |
| H  | -0.380036 | 2.196627  | -2.691250 |
| H  | -1.336323 | 3.512583  | -1.144904 |
| H  | -1.336323 | 3.512583  | 1.144904  |

el energy= -736.019470285

zpe= -735.859178

th energy= -735.845259

th enthalpy= -735.844315

free energy= -735.900362

TS-3

|    |           |           |           |
|----|-----------|-----------|-----------|
| Cr | -0.003146 | -0.486280 | 0.000000  |
| C  | 1.908042  | -0.483942 | 0.000000  |
| O  | 3.058122  | -0.466038 | 0.000000  |
| C  | -0.109126 | -1.868860 | 1.245963  |
| O  | -0.171382 | -2.748224 | 1.995315  |
| C  | -0.109126 | -1.868860 | -1.245963 |
| O  | -0.171382 | -2.748224 | -1.995315 |
| C  | -2.051096 | 0.337419  | 0.000000  |
| C  | -1.450680 | 0.546652  | 1.261003  |
| C  | -0.286827 | 1.276326  | 1.663825  |
| C  | 0.282060  | 2.501318  | 1.241115  |
| C  | 0.393227  | 3.130170  | 0.000000  |
| C  | 0.282060  | 2.501318  | -1.241115 |
| C  | -0.286827 | 1.276326  | -1.663825 |
| C  | -1.450680 | 0.546652  | -1.261003 |
| H  | -2.963723 | -0.257503 | 0.000000  |
| H  | -1.956911 | 0.035321  | 2.081723  |
| H  | 0.003638  | 1.017997  | 2.683962  |
| H  | 0.809682  | 3.024008  | 2.046109  |
| H  | 0.877389  | 4.106341  | 0.000000  |
| H  | 0.809682  | 3.024008  | -2.046109 |
| H  | 0.003638  | 1.017997  | -2.683962 |
| H  | -1.956911 | 0.035321  | -2.081723 |

el energy= -736.015295215

zpe= -735.856839

th energy= -735.842594  
th enthalpy= -735.841650  
free energy= -735.898334

#### TS-4

|    |           |           |           |
|----|-----------|-----------|-----------|
| Cr | -0.049301 | 0.486301  | 0.000000  |
| C  | -1.619351 | 1.509616  | 0.000000  |
| O  | -2.571983 | 2.166545  | 0.000000  |
| C  | 0.638783  | 1.607598  | 1.272548  |
| O  | 1.076489  | 2.310390  | 2.088392  |
| C  | 0.638783  | 1.607598  | -1.272548 |
| O  | 1.076489  | 2.310390  | -2.088392 |
| C  | -1.501885 | -1.681768 | -0.678857 |
| C  | -0.467767 | -2.187659 | -1.596680 |
| C  | 0.844313  | -1.873912 | -1.602435 |
| C  | 1.577777  | -0.976107 | -0.693901 |
| C  | 1.577777  | -0.976107 | 0.693901  |
| C  | 0.844313  | -1.873912 | 1.602435  |
| C  | -0.467767 | -2.187659 | 1.596680  |
| C  | -1.501885 | -1.681768 | 0.678857  |
| H  | -2.419258 | -1.340364 | -1.166427 |
| H  | -0.844463 | -2.800709 | -2.419782 |
| H  | 1.437899  | -2.254506 | -2.438646 |
| H  | 2.404180  | -0.447097 | -1.170038 |
| H  | 2.404180  | -0.447097 | 1.170038  |
| H  | 1.437899  | -2.254506 | 2.438646  |
| H  | -0.844463 | -2.800709 | 2.419782  |
| H  | -2.419258 | -1.340364 | 1.166427  |

el energy= -736.004312890

zpe= -735.845717

th energy= -735.831323

th enthalpy= -735.830379

#### B3LYP/BS5

##### I

|    |           |           |           |
|----|-----------|-----------|-----------|
| Cr | -0.036286 | -0.377801 | 0.000000  |
| C  | 1.836001  | -0.324725 | 0.000000  |
| O  | 2.989074  | -0.253195 | 0.000000  |
| C  | -0.071009 | -1.768168 | 1.240984  |
| O  | -0.085214 | -2.659920 | 1.978716  |
| C  | -0.071009 | -1.768168 | -1.240984 |
| O  | -0.085214 | -2.659920 | -1.978716 |
| C  | 0.456922  | 2.704834  | -0.665270 |
| C  | 0.241325  | 1.493964  | -1.487574 |
| C  | -0.958145 | 0.807966  | -1.654410 |
| C  | -1.991929 | 0.506354  | -0.703310 |
| C  | -1.991929 | 0.506354  | 0.703310  |
| C  | -0.958145 | 0.807966  | 1.654410  |
| C  | 0.241325  | 1.493964  | 1.487574  |
| C  | 0.456922  | 2.704834  | 0.665270  |
| H  | 0.616798  | 3.636456  | -1.216446 |
| H  | 0.928302  | 1.393623  | -2.331771 |
| H  | -1.098550 | 0.297765  | -2.609554 |
| H  | -2.856688 | 0.002376  | -1.137542 |
| H  | -2.856688 | 0.002376  | 1.137542  |
| H  | -1.098550 | 0.297765  | 2.609554  |
| H  | 0.928302  | 1.393623  | 2.331771  |
| H  | 0.616798  | 3.636456  | 1.216446  |

el energy= -736.718929497

zpe= -736.558388

th energy= -736.544131

th enthalpy= -736.543187

free energy= -735.887810

#### TS-5

|    |           |           |           |
|----|-----------|-----------|-----------|
| Cr | 0.403858  | 0.000108  | -0.289282 |
| C  | 1.420441  | -1.538102 | -0.557339 |
| O  | 2.085699  | -2.451279 | -0.797935 |
| C  | 1.432551  | 0.000023  | 1.241322  |
| O  | 2.090446  | 0.000037  | 2.197188  |
| C  | 1.419619  | 1.538853  | -0.556939 |
| O  | 2.084350  | 2.452456  | -0.797388 |
| C  | -1.317249 | 1.295200  | -1.166956 |
| C  | -1.281219 | -0.000494 | -1.730755 |
| C  | -1.317083 | -1.296052 | -1.166664 |
| C  | -1.930508 | -1.791233 | 0.080955  |
| C  | -1.702337 | -1.256195 | 1.290156  |
| C  | -0.912052 | 0.000073  | 1.495076  |
| C  | -1.703040 | 1.255883  | 1.289709  |
| C  | -1.931270 | 1.790481  | 0.080359  |
| H  | -1.100710 | 2.082962  | -1.891232 |
| H  | -0.887325 | -0.000618 | -2.754100 |
| H  | -1.100474 | -2.083948 | -1.890774 |
| H  | -2.517260 | -2.710056 | 0.000225  |
| H  | -2.106660 | -1.746862 | 2.180278  |
| H  | -0.504585 | 0.000379  | 2.511052  |
| H  | -2.107974 | 1.746370  | 2.179655  |
| H  | -2.518685 | 2.708844  | -0.000800 |

el energy= -735.961736393

zpe= -735.803886

th energy= -735.789802

th enthalpy= -735.788858

free energy= -735.845289

free energy= -736.599390

#### TS-1

|    |           |           |           |
|----|-----------|-----------|-----------|
| Cr | 0.336736  | 0.000002  | 0.009221  |
| C  | 1.131758  | 1.259754  | -1.111388 |
| O  | 1.616904  | 2.049823  | -1.804115 |
| C  | 1.898888  | 0.000014  | 1.049669  |
| O  | 2.855326  | 0.000030  | 1.696941  |
| C  | 1.131744  | -1.259802 | -1.111337 |
| O  | 1.616889  | -2.049906 | -1.804024 |
| C  | -2.720683 | -0.663030 | -0.692014 |
| C  | -1.460848 | -1.414787 | -0.462240 |
| C  | -0.930027 | -1.658807 | 0.826759  |
| C  | -0.747735 | -0.715734 | 1.867460  |
| C  | -0.747728 | 0.715803  | 1.867439  |
| C  | -0.930013 | 1.658843  | 0.826705  |
| C  | -1.460837 | 1.414776  | -0.462283 |
| C  | -2.720679 | 0.663019  | -0.692028 |
| H  | -3.638817 | -1.244912 | -0.823525 |
| H  | -1.294243 | -2.233773 | -1.167045 |
| H  | -0.474346 | -2.631443 | 1.025131  |
| H  | -0.321446 | -1.136535 | 2.779460  |
| H  | -0.321434 | 1.136625  | 2.779427  |
| H  | -0.474323 | 2.631482  | 1.025042  |
| H  | -1.294232 | 2.233736  | -1.167118 |
| H  | -3.638810 | 1.244904  | -0.823551 |

el energy= -736.698685959

zpe= -736.538928

th energy= -736.525512  
th enthalpy= -736.524568  
free energy= -736.578398

#### TS-2

|    |           |           |           |
|----|-----------|-----------|-----------|
| Cr | 0.034120  | -0.475107 | 0.000000  |
| C  | -1.180884 | -1.049919 | 1.334400  |
| O  | -1.923931 | -1.418362 | 2.134541  |
| C  | -1.180884 | -1.049919 | -1.334400 |
| O  | -1.923931 | -1.418362 | -2.134541 |
| C  | 0.805998  | -2.131095 | 0.000000  |
| O  | 1.313852  | -3.174000 | 0.000000  |
| C  | -0.059847 | 1.984421  | 1.666971  |
| C  | 0.894873  | 0.867073  | 1.627495  |
| C  | 1.876696  | 0.451229  | 0.715574  |
| C  | 1.876696  | 0.451229  | -0.715574 |
| C  | 0.894873  | 0.867073  | -1.627495 |
| C  | -0.059847 | 1.984421  | -1.666971 |
| C  | -0.653598 | 2.765375  | -0.730622 |
| C  | -0.653598 | 2.765375  | 0.730622  |
| H  | -0.374385 | 2.198809  | 2.690618  |
| H  | 1.079780  | 0.478810  | 2.629856  |
| H  | 2.660436  | -0.173143 | 1.146689  |
| H  | 2.660436  | -0.173143 | -1.146689 |
| H  | 1.079780  | 0.478810  | -2.629856 |
| H  | -0.374385 | 2.198809  | -2.690618 |
| H  | -1.320654 | 3.523919  | -1.145260 |
| H  | -1.320654 | 3.523919  | 1.145260  |

el energy= -736.704324308

zpe= -736.544072

th energy= -736.530137

th enthalpy= -736.529193

free energy= -736.585308

#### TS-3

|    |           |           |           |
|----|-----------|-----------|-----------|
| Cr | -0.002355 | -0.488756 | 0.000000  |
| C  | 1.906119  | -0.471710 | 0.000000  |
| O  | 3.056070  | -0.443191 | 0.000000  |
| C  | -0.102871 | -1.868005 | 1.246821  |
| O  | -0.163190 | -2.746517 | 1.997524  |
| C  | -0.102871 | -1.868005 | -1.246821 |
| O  | -0.163190 | -2.746517 | -1.997524 |
| C  | -2.052117 | 0.329244  | 0.000000  |
| C  | -1.451718 | 0.539329  | 1.260557  |
| C  | -0.289008 | 1.272378  | 1.661536  |
| C  | 0.275793  | 2.500114  | 1.240604  |
| C  | 0.384150  | 3.130175  | 0.000000  |
| C  | 0.275793  | 2.500114  | -1.240604 |
| C  | -0.289008 | 1.272378  | -1.661536 |
| C  | -1.451718 | 0.539329  | -1.260557 |
| H  | -2.963413 | -0.267648 | 0.000000  |
| H  | -1.956509 | 0.028431  | 2.082358  |
| H  | 0.004855  | 1.012568  | 2.680439  |
| H  | 0.802539  | 3.022880  | 2.046021  |
| H  | 0.865377  | 4.107775  | 0.000000  |
| H  | 0.802539  | 3.022880  | -2.046021 |
| H  | 0.004855  | 1.012568  | -2.680439 |
| H  | -1.956509 | 0.028431  | -2.082358 |

el energy= -736.700295450

zpe= -736.541839

th energy= -736.527580

th enthalpy= -736.526636  
free energy= -736.583390

#### TS-4

|    |           |           |           |
|----|-----------|-----------|-----------|
| Cr | -0.048050 | 0.490680  | 0.000000  |
| C  | -1.617899 | 1.509494  | 0.000000  |
| O  | -2.572781 | 2.163626  | 0.000000  |
| C  | 0.640321  | 1.606120  | 1.275147  |
| O  | 1.079020  | 2.303646  | 2.095229  |
| C  | 0.640321  | 1.606120  | -1.275147 |
| O  | 1.079020  | 2.303646  | -2.095229 |
| C  | -1.500832 | -1.675690 | -0.679092 |
| C  | -0.469900 | -2.188249 | -1.596449 |
| C  | 0.842570  | -1.876366 | -1.602369 |
| C  | 1.573730  | -0.976139 | -0.694468 |
| C  | 1.573730  | -0.976139 | 0.694468  |
| C  | 0.842570  | -1.876366 | 1.602369  |
| C  | -0.469900 | -2.188249 | 1.596449  |
| C  | -1.500832 | -1.675690 | 0.679092  |
| H  | -2.416306 | -1.328973 | -1.166479 |
| H  | -0.848831 | -2.801373 | -2.418349 |
| H  | 1.437264  | -2.258569 | -2.436852 |
| H  | 2.401804  | -0.449451 | -1.170422 |
| H  | 2.401804  | -0.449451 | 1.170422  |
| H  | 1.437264  | -2.258569 | 2.436852  |
| H  | -0.848831 | -2.801373 | 2.418349  |
| H  | -2.416306 | -1.328973 | 1.166479  |

el energy= -736.688676857

zpe= -736.530048

th energy= -736.515656

th enthalpy= -736.514711

free energy= -736.572125

#### TS-5

|    |           |           |           |
|----|-----------|-----------|-----------|
| Cr | 0.409457  | 0.000217  | -0.289458 |
| C  | 1.425675  | -1.535964 | -0.552887 |
| O  | 2.088867  | -2.451363 | -0.791104 |
| C  | 1.424454  | -0.000005 | 1.248430  |
| O  | 2.072569  | -0.000063 | 2.211111  |
| C  | 1.424584  | 1.537084  | -0.552215 |
| O  | 2.087101  | 2.453048  | -0.790215 |
| C  | -1.309098 | 1.295786  | -1.169860 |
| C  | -1.271034 | -0.000686 | -1.732451 |
| C  | -1.308903 | -1.296965 | -1.169521 |
| C  | -1.931384 | -1.793377 | 0.073488  |
| C  | -1.712495 | -1.256410 | 1.283252  |
| C  | -0.921159 | 0.000116  | 1.488141  |
| C  | -1.713663 | 1.255890  | 1.282629  |
| C  | -1.932658 | 1.792244  | 0.072670  |
| H  | -1.089354 | 2.082701  | -1.894047 |
| H  | -0.877024 | -0.000843 | -2.756015 |
| H  | -1.089008 | -2.084039 | -1.893483 |
| H  | -2.518037 | -2.711643 | -0.012333 |
| H  | -2.124023 | -1.743596 | 2.171856  |
| H  | -0.517055 | 0.000571  | 2.505440  |
| H  | -2.126244 | 1.742656  | 2.170978  |
| H  | -2.520439 | 2.709731  | -0.013801 |

el energy= -736.647320934

zpe= -736.489463

th energy= -736.475376

th enthalpy= -736.474432

free energy= -736.530891

### B97-1/BS2

I

|    |           |           |           |
|----|-----------|-----------|-----------|
| Cr | -0.038992 | -0.369002 | 0.000000  |
| C  | 1.839242  | -0.311717 | 0.000000  |
| O  | 2.983930  | -0.231529 | 0.000000  |
| C  | -0.068125 | -1.768103 | 1.241783  |
| O  | -0.076850 | -2.656716 | 1.970363  |
| C  | -0.068125 | -1.768103 | -1.241783 |
| O  | -0.076850 | -2.656716 | -1.970363 |
| C  | 0.449549  | 2.694287  | -0.661995 |
| C  | 0.242305  | 1.479747  | -1.478665 |
| C  | -0.958557 | 0.802036  | -1.651419 |
| C  | -1.990093 | 0.501094  | -0.702380 |
| C  | -1.990093 | 0.501094  | 0.702380  |
| C  | -0.958557 | 0.802036  | 1.651419  |
| C  | 0.242305  | 1.479747  | 1.478665  |
| C  | 0.449549  | 2.694287  | 0.661995  |
| H  | 0.598902  | 3.620220  | -1.213613 |
| H  | 0.926728  | 1.378580  | -2.317213 |
| H  | -1.097593 | 0.292502  | -2.600744 |
| H  | -2.849255 | -0.002658 | -1.133178 |
| H  | -2.849255 | -0.002658 | 1.133178  |
| H  | -1.097593 | 0.292502  | 2.600744  |
| H  | 0.926728  | 1.378580  | 2.317213  |
| H  | 0.598902  | 3.620220  | 1.213613  |

el energy= -735.952274029

zpe= -735.791612

th energy= -735.777451

th enthalpy= -735.776506

free energy= -735.832561

TS-1

|    |           |           |           |
|----|-----------|-----------|-----------|
| Cr | -0.012677 | -0.326144 | 0.000000  |
| C  | 1.112355  | -1.127188 | 1.262536  |
| O  | 1.800469  | -1.610597 | 2.045678  |
| C  | -1.051983 | -1.896204 | 0.000000  |
| O  | -1.689569 | -2.849489 | 0.000000  |
| C  | 1.112355  | -1.127188 | -1.262536 |
| O  | 1.800469  | -1.610597 | -2.045678 |
| C  | 0.688429  | 2.710429  | -0.659833 |
| C  | 0.465446  | 1.446778  | -1.404795 |
| C  | -0.824638 | 0.925004  | -1.656599 |
| C  | -1.862146 | 0.743123  | -0.715378 |
| C  | -1.862146 | 0.743123  | 0.715378  |
| C  | -0.824638 | 0.925004  | 1.656599  |
| C  | 0.465446  | 1.446778  | 1.404795  |
| C  | 0.688429  | 2.710429  | 0.659833  |
| H  | 0.812092  | 3.621667  | -1.242543 |
| H  | 1.166707  | 1.282792  | -2.219980 |
| H  | -1.023805 | 0.474569  | -2.625050 |
| H  | -2.769069 | 0.317165  | -1.132448 |
| H  | -2.769069 | 0.317165  | 1.132448  |
| H  | -1.023805 | 0.474569  | 2.625050  |
| H  | 1.166707  | 1.282792  | 2.219980  |
| H  | 0.812092  | 3.621667  | 1.242543  |

el energy= -735.932422381

zpe= -735.772405

th energy= -735.759124

th enthalpy= -735.758180

free energy= -735.811790

TS-2

|    |           |           |           |
|----|-----------|-----------|-----------|
| Cr | 0.034257  | -0.451314 | 0.000000  |
| C  | -1.181779 | -1.042223 | 1.334958  |
| O  | -1.910646 | -1.428018 | 2.128728  |
| C  | -1.181779 | -1.042223 | -1.334958 |
| O  | -1.910646 | -1.428018 | -2.128728 |
| C  | 0.808568  | -2.116820 | 0.000000  |
| O  | 1.307959  | -3.154110 | 0.000000  |
| C  | -0.065875 | 1.965750  | 1.663648  |
| C  | 0.905641  | 0.867922  | 1.627450  |
| C  | 1.882784  | 0.455737  | 0.714260  |
| C  | 1.882784  | 0.455737  | -0.714260 |
| C  | 0.905641  | 0.867922  | -1.627450 |
| C  | -0.065875 | 1.965750  | -1.663648 |
| C  | -0.674015 | 2.727973  | -0.729150 |
| C  | -0.674015 | 2.727973  | 0.729150  |
| H  | -0.384326 | 2.173533  | 2.681101  |
| H  | 1.094058  | 0.482497  | 2.623736  |
| H  | 2.662668  | -0.166074 | 1.141242  |
| H  | 2.662668  | -0.166074 | -1.141242 |
| H  | 1.094058  | 0.482497  | -2.623736 |
| H  | -0.384326 | 2.173533  | -2.681101 |
| H  | -1.356398 | 3.465902  | -1.140137 |
| H  | -1.356398 | 3.465902  | 1.140137  |

el energy= -735.936108899

zpe= -735.775819

th energy= -735.761924

th enthalpy= -735.760980

free energy= -735.817108

TS-3

|    |           |           |           |
|----|-----------|-----------|-----------|
| Cr | -0.004281 | -0.471909 | 0.000000  |
| C  | 1.913936  | -0.464229 | 0.000000  |
| O  | 3.056188  | -0.449525 | 0.000000  |
| C  | -0.099774 | -1.860493 | 1.247136  |
| O  | -0.157730 | -2.738846 | 1.985175  |
| C  | -0.099774 | -1.860493 | -1.247136 |
| O  | -0.157730 | -2.738846 | -1.985175 |
| C  | -2.058415 | 0.325131  | 0.000000  |
| C  | -1.461654 | 0.536356  | 1.258588  |
| C  | -0.305328 | 1.270924  | 1.665367  |
| C  | 0.283118  | 2.479320  | 1.237402  |
| C  | 0.405198  | 3.103240  | 0.000000  |
| C  | 0.283118  | 2.479320  | -1.237402 |
| C  | -0.305328 | 1.270924  | -1.665367 |
| C  | -1.461654 | 0.536356  | -1.258588 |
| H  | -2.962059 | -0.272633 | 0.000000  |
| H  | -1.964207 | 0.026143  | 2.074465  |
| H  | -0.018716 | 1.011449  | 2.680170  |
| H  | 0.819382  | 2.989303  | 2.036805  |
| H  | 0.905402  | 4.064260  | 0.000000  |
| H  | 0.819382  | 2.989303  | -2.036805 |
| H  | -0.018716 | 1.011449  | -2.680170 |
| H  | -1.964207 | 0.026143  | -2.074465 |

el energy= -735.931273438

zpe= -735.772810

th energy= -735.758573

th enthalpy= -735.757629

free energy= -735.814455

#### TS-4

|                           |           |           |           |
|---------------------------|-----------|-----------|-----------|
| Cr                        | -0.052467 | 0.463225  | 0.000000  |
| C                         | -1.616556 | 1.505425  | 0.000000  |
| O                         | -2.540862 | 2.188293  | 0.000000  |
| C                         | 0.632218  | 1.597024  | 1.271753  |
| O                         | 1.063512  | 2.309327  | 2.070854  |
| C                         | 0.632218  | 1.597024  | -1.271753 |
| O                         | 1.063512  | 2.309327  | -2.070854 |
| C                         | -1.498012 | -1.691091 | -0.676293 |
| C                         | -0.461312 | -2.175921 | -1.598316 |
| C                         | 0.843318  | -1.853119 | -1.604724 |
| C                         | 1.575560  | -0.962299 | -0.693062 |
| C                         | 1.575560  | -0.962299 | 0.693062  |
| C                         | 0.843318  | -1.853119 | 1.604724  |
| C                         | -0.461312 | -2.175921 | 1.598316  |
| C                         | -1.498012 | -1.691091 | 0.676293  |
| H                         | -2.415484 | -1.362477 | -1.159292 |
| H                         | -0.834128 | -2.773998 | -2.425775 |
| H                         | 1.431869  | -2.214020 | -2.444998 |
| H                         | 2.401738  | -0.439842 | -1.163462 |
| H                         | 2.401738  | -0.439842 | 1.163462  |
| H                         | 1.431869  | -2.214020 | 2.444998  |
| H                         | -0.834128 | -2.773998 | 2.425775  |
| H                         | -2.415484 | -1.362477 | 1.159292  |
| el energy= -735.919438863 |           |           |           |
| zpe= -735.760586          |           |           |           |
| th energy= -735.746238    |           |           |           |
| th enthalpy= -735.745294  |           |           |           |
| free energy= -735.802882  |           |           |           |

#### B97-1/BS3

##### I

|                           |           |           |           |
|---------------------------|-----------|-----------|-----------|
| Cr                        | 0.039971  | 0.364415  | 0.000000  |
| C                         | -1.832378 | 0.295517  | 0.000000  |
| O                         | -2.978120 | 0.211929  | 0.000000  |
| C                         | 0.063260  | 1.764261  | 1.230069  |
| O                         | 0.067905  | 2.661702  | 1.950982  |
| C                         | 0.063260  | 1.764261  | -1.230069 |
| O                         | 0.067905  | 2.661702  | -1.950982 |
| C                         | -0.436903 | -2.695320 | -0.661614 |
| C                         | -0.245475 | -1.471322 | -1.469427 |
| C                         | 0.956488  | -0.793244 | -1.650581 |
| C                         | 1.987722  | -0.493980 | -0.702916 |
| C                         | 1.987722  | -0.493980 | 0.702916  |
| C                         | 0.956488  | -0.793244 | 1.650581  |
| C                         | -0.245475 | -1.471322 | 1.469427  |
| C                         | -0.436903 | -2.695320 | 0.661614  |
| H                         | -0.569045 | -3.621482 | -1.217280 |
| H                         | -0.934717 | -1.370077 | -2.304176 |
| H                         | 1.095291  | -0.286522 | -2.601416 |
| H                         | 2.844643  | 0.014858  | -1.132707 |
| H                         | 2.844643  | 0.014858  | 1.132707  |
| H                         | 1.095291  | -0.286522 | 2.601416  |
| H                         | -0.934717 | -1.370077 | 2.304176  |
| H                         | -0.569045 | -3.621482 | 1.217280  |
| el energy= -1694.10660525 |           |           |           |
| zpe= -1693.945839         |           |           |           |
| th energy= -1693.931761   |           |           |           |
| th enthalpy= -1693.930817 |           |           |           |
| free energy= -1693.986681 |           |           |           |

#### TS-5

|                           |           |           |           |
|---------------------------|-----------|-----------|-----------|
| Cr                        | 0.314527  | 0.404906  | 0.000000  |
| C                         | 0.566566  | 1.419701  | 1.549758  |
| O                         | 0.774584  | 2.071981  | 2.469633  |
| C                         | -1.218898 | 1.429405  | 0.000000  |
| O                         | -2.168586 | 2.083046  | 0.000000  |
| C                         | 0.566566  | 1.419701  | -1.549758 |
| O                         | 0.774584  | 2.071981  | -2.469633 |
| C                         | 1.152800  | -1.327652 | -1.293372 |
| C                         | 1.715731  | -1.309360 | 0.000000  |
| C                         | 1.152800  | -1.327652 | 1.293372  |
| C                         | -0.102917 | -1.923768 | 1.787689  |
| C                         | -1.301453 | -1.679430 | 1.253096  |
| C                         | -1.486298 | -0.876672 | 0.000000  |
| C                         | -1.301453 | -1.679430 | -1.253096 |
| C                         | -0.102917 | -1.923768 | -1.787689 |
| H                         | 1.879401  | -1.127421 | -2.075344 |
| H                         | 2.741805  | -0.937380 | 0.000000  |
| H                         | 1.879401  | -1.127421 | 2.075344  |
| H                         | -0.027631 | -2.519254 | 2.693967  |
| H                         | -2.194173 | -2.084076 | 1.724888  |
| H                         | -2.493470 | -0.461377 | 0.000000  |
| H                         | -2.194173 | -2.084076 | -1.724888 |
| H                         | -0.027631 | -2.519254 | -2.693967 |
| el energy= -735.878795739 |           |           |           |
| zpe= -735.720729          |           |           |           |
| th energy= -735.706713    |           |           |           |
| th enthalpy= -735.705769  |           |           |           |
| free energy= -735.761911  |           |           |           |

#### TS-1

|                           |           |           |           |
|---------------------------|-----------|-----------|-----------|
| Cr                        | -0.016701 | -0.321932 | 0.000000  |
| C                         | 1.104750  | -1.124931 | 1.253956  |
| O                         | 1.793949  | -1.615879 | 2.034042  |
| C                         | -1.048323 | -1.890433 | 0.000000  |
| O                         | -1.678449 | -2.850527 | 0.000000  |
| C                         | 1.104750  | -1.124931 | -1.253956 |
| O                         | 1.793949  | -1.615879 | -2.034042 |
| C                         | 0.686141  | 2.714199  | -0.659569 |
| C                         | 0.471594  | 1.442451  | -1.394392 |
| C                         | -0.819246 | 0.922150  | -1.654697 |
| C                         | -1.858037 | 0.742064  | -0.715436 |
| C                         | -1.858037 | 0.742064  | 0.715436  |
| C                         | -0.819246 | 0.922150  | 1.654697  |
| C                         | 0.471594  | 1.442451  | 1.394392  |
| C                         | 0.686141  | 2.714199  | 0.659569  |
| H                         | 0.800739  | 3.623996  | -1.246310 |
| H                         | 1.177842  | 1.273944  | -2.204605 |
| H                         | -1.017805 | 0.475832  | -2.625186 |
| H                         | -2.764406 | 0.314248  | -1.132249 |
| H                         | -2.764406 | 0.314248  | 1.132249  |
| H                         | -1.017805 | 0.475832  | 2.625186  |
| H                         | 1.177842  | 1.273944  | 2.204605  |
| H                         | 0.800739  | 3.623996  | 1.246310  |
| el energy= -1694.08719667 |           |           |           |
| zpe= -1693.927120         |           |           |           |
| th energy= -1693.913894   |           |           |           |
| th enthalpy= -1693.912950 |           |           |           |

free energy= -1693.966451

TS-2

|    |           |           |           |
|----|-----------|-----------|-----------|
| Cr | 0.036832  | -0.455918 | 0.000000  |
| C  | -1.170502 | -1.050324 | 1.331244  |
| O  | -1.898097 | -1.441046 | 2.126273  |
| C  | -1.170502 | -1.050324 | -1.331244 |
| O  | -1.898097 | -1.441046 | -2.126273 |
| C  | 0.803392  | -2.110995 | 0.000000  |
| O  | 1.302418  | -3.151589 | 0.000000  |
| C  | -0.071023 | 1.973593  | 1.662494  |
| C  | 0.893830  | 0.869309  | 1.624466  |
| C  | 1.875524  | 0.458860  | 0.713669  |
| C  | 1.875524  | 0.458860  | -0.713669 |
| C  | 0.893830  | 0.869309  | -1.624466 |
| C  | -0.071023 | 1.973593  | -1.662494 |
| C  | -0.673131 | 2.741106  | -0.729167 |
| C  | -0.673131 | 2.741106  | 0.729167  |
| H  | -0.389524 | 2.179814  | 2.680250  |
| H  | 1.079401  | 0.482444  | 2.620870  |
| H  | 2.655552  | -0.162249 | 1.141635  |
| H  | 2.655552  | -0.162249 | -1.141635 |
| H  | 1.079401  | 0.482444  | -2.620870 |
| H  | -0.389524 | 2.179814  | -2.680250 |
| H  | -1.350677 | 3.483459  | -1.140316 |
| H  | -1.350677 | 3.483459  | 1.140316  |

el energy= -1694.08940965  
zpe= -1693.929066  
th energy= -1693.915209  
th enthalpy= -1693.914265  
free energy= -1693.970322

TS-3

|    |           |           |           |
|----|-----------|-----------|-----------|
| Cr | -0.002889 | -0.471521 | 0.000000  |
| C  | 1.910513  | -0.461363 | 0.000000  |
| O  | 3.054369  | -0.449975 | 0.000000  |
| C  | -0.099484 | -1.859286 | 1.232500  |
| O  | -0.160045 | -2.747577 | 1.962348  |
| C  | -0.099484 | -1.859286 | -1.232500 |
| O  | -0.160045 | -2.747577 | -1.962348 |
| C  | -2.052293 | 0.320791  | 0.000000  |
| C  | -1.456177 | 0.533775  | 1.258500  |
| C  | -0.300985 | 1.271725  | 1.661644  |
| C  | 0.277736  | 2.486315  | 1.236323  |
| C  | 0.394583  | 3.112029  | 0.000000  |
| C  | 0.277736  | 2.486315  | -1.236323 |
| C  | -0.300985 | 1.271725  | -1.661644 |
| C  | -1.456177 | 0.533775  | -1.258500 |
| H  | -2.952367 | -0.282713 | 0.000000  |
| H  | -1.955524 | 0.021185  | 2.074830  |
| H  | -0.010116 | 1.012276  | 2.675322  |
| H  | 0.810345  | 2.998848  | 2.036560  |
| H  | 0.888149  | 4.076531  | 0.000000  |
| H  | 0.810345  | 2.998848  | -2.036560 |
| H  | -0.010116 | 1.012276  | -2.675322 |
| H  | -1.955524 | 0.021185  | -2.074830 |

el energy= -1694.08508337  
zpe= -1693.926505  
th energy= -1693.912320  
th enthalpy= -1693.911376  
free energy= -1693.968123

TS-4

|    |           |           |           |
|----|-----------|-----------|-----------|
| Cr | 0.054040  | -0.461316 | 0.000000  |
| C  | 1.616258  | -1.491710 | 0.000000  |
| O  | 2.547053  | -2.168688 | 0.000000  |
| C  | -0.624765 | -1.597806 | 1.257742  |
| O  | -1.058980 | -2.315302 | 2.053847  |
| C  | -0.624765 | -1.597806 | -1.257742 |
| O  | -1.058980 | -2.315302 | -2.053847 |
| C  | 1.492181  | 1.692637  | -0.676397 |
| C  | 0.455654  | 2.173221  | -1.600241 |
| C  | -0.848207 | 1.848405  | -1.606105 |
| C  | -1.577354 | 0.956533  | -0.693227 |
| C  | -1.577354 | 0.956533  | 0.693227  |
| C  | -0.848207 | 1.848405  | 1.606105  |
| C  | 0.455654  | 2.173221  | 1.600241  |
| C  | 1.492181  | 1.692637  | 0.676397  |
| H  | 2.410980  | 1.366455  | -1.158426 |
| H  | 0.828440  | 2.768803  | -2.429536 |
| H  | -1.437391 | 2.204951  | -2.447841 |
| H  | -2.400710 | 0.429937  | -1.164174 |
| H  | -2.400710 | 0.429937  | 1.164174  |
| H  | -1.437391 | 2.204951  | 2.447841  |
| H  | 0.828440  | 2.768803  | 2.429536  |
| H  | 2.410980  | 1.366455  | 1.158426  |

el energy= -1694.07114528  
zpe= -1693.912207  
th energy= -1693.897902  
th enthalpy= -1693.896957  
free energy= -1693.954437

TS-5

|    |           |           |           |
|----|-----------|-----------|-----------|
| Cr | 0.316115  | 0.400117  | 0.000000  |
| C  | 0.561382  | 1.412549  | 1.540620  |
| O  | 0.769225  | 2.064400  | 2.464304  |
| C  | -1.198907 | 1.441945  | 0.000000  |
| O  | -2.142870 | 2.107532  | 0.000000  |
| C  | 0.561382  | 1.412549  | -1.540620 |
| O  | 0.769225  | 2.064400  | -2.464304 |
| C  | 1.146494  | -1.325013 | -1.292809 |
| C  | 1.711020  | -1.310281 | 0.000000  |
| C  | 1.146494  | -1.325013 | 1.292809  |
| C  | -0.107603 | -1.925827 | 1.786471  |
| C  | -1.304642 | -1.679507 | 1.250976  |
| C  | -1.483910 | -0.872007 | 0.000000  |
| C  | -1.304642 | -1.679507 | -1.250976 |
| C  | -0.107603 | -1.925827 | -1.786471 |
| H  | 1.871740  | -1.121277 | -2.075164 |
| H  | 2.735819  | -0.934285 | 0.000000  |
| H  | 1.871740  | -1.121277 | 2.075164  |
| H  | -0.031266 | -2.523664 | 2.690967  |
| H  | -2.199451 | -2.084606 | 1.718314  |
| H  | -2.486039 | -0.444458 | 0.000000  |
| H  | -2.199451 | -2.084606 | -1.718314 |
| H  | -0.031266 | -2.523664 | -2.690967 |

el energy= -1694.03350669  
zpe= -1693.875316  
th energy= -1693.861397  
th enthalpy= -1693.860453  
free energy= -1693.916280



# Molecular Coordinates for (TMCOT)Cr(CO)<sub>3</sub> (Å)

## PBE0/BS1

II

|    |           |           |           |
|----|-----------|-----------|-----------|
| C  | 2.536410  | 0.095897  | -0.033772 |
| C  | 1.436369  | 1.005236  | -0.447383 |
| C  | 0.629885  | 1.704174  | 0.467701  |
| C  | -0.016077 | 1.121367  | 1.607909  |
| C  | -0.347127 | -0.205973 | 1.954110  |
| C  | -0.050450 | -1.429564 | 1.255388  |
| C  | 0.902653  | -1.727650 | 0.285608  |
| C  | 2.266687  | -1.159078 | 0.306592  |
| Cr | -0.596720 | 0.055258  | -0.249506 |
| C  | -0.138524 | -0.514084 | -1.929636 |
| C  | -2.182585 | -0.877961 | -0.257590 |
| C  | -1.670453 | 1.373412  | -0.934524 |
| O  | 0.208143  | -0.886999 | -2.964154 |
| O  | -3.192919 | -1.433478 | -0.283883 |
| O  | -2.390130 | 2.151490  | -1.390379 |
| C  | 3.910982  | 0.697922  | -0.002866 |
| C  | 0.343599  | 3.169642  | 0.230233  |
| C  | -1.315618 | -0.371507 | 3.105563  |
| C  | 0.797510  | -3.065007 | -0.408864 |
| H  | 3.954835  | 1.540872  | 0.701309  |
| H  | 4.185730  | 1.097747  | -0.989454 |
| H  | 4.668722  | -0.036800 | 0.291370  |
| H  | 1.478553  | -3.792371 | 0.058414  |
| H  | 1.091381  | -2.982947 | -1.462329 |
| H  | -0.220326 | -3.468928 | -0.370689 |
| H  | -2.118636 | -1.073166 | 2.850421  |
| H  | -1.775719 | 0.577697  | 3.397490  |
| H  | -0.792089 | -0.778644 | 3.981428  |
| H  | -0.639279 | 3.477900  | 0.603277  |
| H  | 0.394932  | 3.410082  | -0.837247 |
| H  | 1.106968  | 3.775033  | 0.739838  |
| H  | 3.058645  | -1.839810 | 0.630812  |
| H  | -0.782970 | -2.212697 | 1.461554  |
| H  | -0.567888 | 1.851675  | 2.199983  |
| H  | 1.658102  | 1.579116  | -1.351535 |

el energy= -892.224976056

zpe= -891.949782

th energy= -891.929554

th enthalpy= -891.928610

free energy= -891.996913

TS-A

|    |           |           |           |
|----|-----------|-----------|-----------|
| C  | -2.592326 | 0.043452  | -0.254779 |
| C  | -1.451513 | -0.833917 | -0.634508 |
| C  | -0.803093 | -1.624133 | 0.359589  |
| C  | -0.258544 | -1.054911 | 1.536996  |
| C  | 0.106865  | 0.283473  | 1.905299  |
| C  | -0.060219 | 1.498650  | 1.183685  |
| C  | -0.916646 | 1.782515  | 0.102530  |
| C  | -2.312289 | 1.291620  | 0.089931  |
| Cr | 0.597783  | -0.035409 | -0.235078 |
| C  | 0.878146  | -1.027079 | -1.747466 |
| C  | 1.477417  | 1.263038  | -1.181496 |
| C  | 2.244342  | -0.579484 | 0.375305  |

|   |           |           |           |
|---|-----------|-----------|-----------|
| O | 1.036444  | -1.665537 | -2.695391 |
| O | 2.055109  | 2.058312  | -1.786623 |
| O | 3.266432  | -0.933831 | 0.772435  |
| C | -3.959515 | -0.573380 | -0.245807 |
| C | -0.592778 | -3.102891 | 0.142639  |
| C | 0.959700  | 0.377142  | 3.152946  |
| C | -0.742614 | 3.115219  | -0.587445 |
| H | -4.008467 | -1.409699 | 0.466221  |
| H | -4.211882 | -0.985655 | -1.233107 |
| H | -4.731220 | 0.154906  | 0.027828  |
| H | -1.485838 | 3.830138  | -0.201318 |
| H | -0.917016 | 3.025379  | -1.665983 |
| H | 0.252930  | 3.544431  | -0.437157 |
| H | 0.311760  | 0.434796  | 4.038462  |
| H | 1.615582  | -0.491713 | 3.275236  |
| H | 1.584821  | 1.276054  | 3.144454  |
| H | -1.484739 | -3.657984 | 0.467026  |
| H | -0.446834 | -3.320229 | -0.921385 |
| H | 0.273190  | -3.489721 | 0.691405  |
| H | -3.081998 | 2.002275  | 0.405062  |
| H | 0.659418  | 2.270659  | 1.462711  |
| H | 0.213627  | -1.790813 | 2.188841  |
| H | -1.615608 | -1.370440 | -1.574313 |

el energy= -892.204187881

zpe= -891.929758

th energy= -891.910224

th enthalpy= -891.909280

free energy= -891.975636

TS-B

|    |           |           |           |
|----|-----------|-----------|-----------|
| C  | -0.026757 | 2.201392  | 1.231760  |
| C  | -0.184448 | 2.834822  | 0.000000  |
| C  | -0.026757 | 2.201392  | -1.231760 |
| C  | -0.157248 | 0.818047  | -1.546812 |
| C  | -1.274475 | -0.054202 | -1.262036 |
| C  | -1.858438 | -0.296024 | 0.000000  |
| C  | -1.274475 | -0.054202 | 1.262036  |
| C  | -0.157248 | 0.818047  | 1.546812  |
| Cr | 0.268776  | -0.797800 | 0.000000  |
| C  | 2.086315  | -0.426321 | 0.000000  |
| C  | 0.450651  | -2.155562 | 1.209893  |
| C  | 0.450651  | -2.155562 | -1.209893 |
| O  | 3.201200  | -0.145433 | 0.000000  |
| O  | 0.578948  | -3.034516 | 1.949411  |
| O  | 0.578948  | -3.034516 | -1.949411 |
| C  | 0.418398  | 3.065448  | 2.380878  |
| C  | 0.418398  | 3.065448  | -2.380878 |
| C  | -1.914107 | -0.725748 | -2.453388 |
| C  | -1.914107 | -0.725748 | 2.453388  |
| H  | 0.620566  | 4.098510  | 2.081956  |
| H  | 1.329639  | 2.646106  | 2.829028  |
| H  | -0.343647 | 3.069320  | 3.172745  |
| H  | -2.612134 | -0.032586 | 2.944456  |
| H  | -1.161771 | -1.014207 | 3.195858  |
| H  | -2.469641 | -1.625037 | 2.164051  |

H -2.469641 -1.625037 -2.164051  
 H -2.612134 -0.032586 -2.944456  
 H -1.161771 -1.014207 -3.195858  
 H -0.343647 3.069320 -3.172745  
 H 0.620566 4.098510 -2.081956  
 H 1.329639 2.646106 -2.829028  
 H 0.263653 0.590069 2.528631  
 H -2.699161 -0.988110 0.000000  
 H 0.263653 0.590069 -2.528631  
 H -0.095658 3.919312 0.000000  
 el energy= -892.203247978  
 zpe= -891.929558  
 th energy= -891.909679  
 th enthalpy= -891.908734  
 free energy= -891.976785

#### TS-C

C 1.580892 1.686035 0.258653  
 C 0.215079 1.628120 0.816565  
 C -0.477713 0.770357 1.691344  
 C -0.457368 -0.660234 1.722405  
 C 0.223644 -1.620610 0.957524  
 C 1.607155 -1.648583 0.455806  
 C 2.543839 -0.737496 0.103386  
 C 2.500455 0.726408 0.009399  
 Cr -0.688690 -0.003353 -0.315531  
 C -0.826508 1.233049 -1.695366  
 C -0.838282 -1.387385 -1.543710  
 C -2.477367 0.006395 -0.165402  
 O -0.934402 2.003416 -2.542176  
 O -0.944821 -2.250022 -2.296641  
 O -3.628317 0.010050 -0.049067  
 C 1.932003 3.100770 -0.138251  
 C -1.567717 1.404718 2.528647  
 C -0.339966 -3.027517 1.069597  
 C 3.880288 -1.272684 -0.354733  
 H 1.874520 3.777702 0.725981  
 H 1.216303 3.477252 -0.883885  
 H 2.936568 3.172176 -0.566460  
 H 4.691072 -0.863692 0.265439  
 H 4.091923 -0.964871 -1.388981  
 H 3.930879 -2.364775 -0.305785  
 H 0.196343 -3.592878 1.845624  
 H -1.405266 -3.019083 1.320622  
 H -0.222749 -3.575635 0.127134  
 H -1.176518 1.630160 3.530726  
 H -1.914885 2.345867 2.089295  
 H -2.435151 0.746212 2.649423  
 H 3.425133 1.117133 -0.416595  
 H 1.930142 -2.679879 0.307893  
 H -1.312949 -1.065151 2.263232  
 H -0.227096 2.624312 0.816956

el energy= -892.196067018  
 zpe= -891.921207  
 th energy= -891.901404  
 th enthalpy= -891.900460  
 free energy= -891.968284

#### TS-D

C -1.824772 -0.822530 -1.349770  
 C -0.631007 -1.440567 -0.716371

C -0.432155 -1.611168 0.651830  
 C -1.165495 -0.880133 1.690327  
 C -1.436206 0.443924 1.777572  
 C -1.086370 1.471193 0.777429  
 C -1.422083 1.517277 -0.539840  
 C -2.182134 0.465605 -1.236780  
 Cr 0.811929 0.141105 -0.156152  
 C 1.893923 -0.600616 -1.381883  
 C 1.823724 1.671743 -0.294077  
 C 1.986625 -0.402519 1.094104  
 O 2.573424 -1.092789 -2.182426  
 O 2.497804 2.603707 -0.391301  
 O 2.735973 -0.739682 1.911293  
 C -2.619080 -1.775038 -2.200357  
 C 0.303204 -2.836468 1.142010  
 C -2.041101 1.014013 3.032264  
 C -1.142233 2.751310 -1.357299  
 H -2.967020 -2.630592 -1.605235  
 H -1.993674 -2.185772 -3.005648  
 H -3.489023 -1.288853 -2.654855  
 H -2.090913 3.206264 -1.678215  
 H -0.585704 2.505286 -2.270275  
 H -0.574677 3.498463 -0.793089  
 H -2.985157 1.531744 2.813185  
 H -2.236636 0.236183 3.777890  
 H -1.369888 1.759549 3.482611  
 H -0.424345 -3.625723 1.387035  
 H 0.975595 -3.225781 0.370491  
 H 0.894998 -2.639524 2.042642  
 H -3.060765 0.814725 -1.784129  
 H -0.624527 2.367310 1.199183  
 H -1.398682 -1.475924 2.576426  
 H -0.162547 -2.199930 -1.345868

el energy= -892.188172977  
 zpe= -891.914867  
 th energy= -891.894566  
 th enthalpy= -891.893621  
 free energy= -891.963048

#### TS-E

C 0.884883 -1.629468 0.192299  
 C 2.224749 -1.218249 -0.009715  
 C 2.895376 -0.000126 0.080720  
 C 2.224670 1.218067 -0.008403  
 C 0.884887 1.629115 0.194239  
 C 0.026338 1.245624 1.281259  
 C -0.247018 -0.001217 1.890877  
 C 0.026484 -1.247340 1.279967  
 Cr -0.769222 -0.000045 -0.226553  
 C -2.151218 -1.196182 -0.317052  
 C -2.151030 1.196384 -0.315529  
 C -0.479573 0.001803 -2.078724  
 O -3.050250 -1.918310 -0.376557  
 O -3.049922 1.918760 -0.374164  
 O -0.273920 0.003124 -3.207078  
 C 0.585567 -3.019946 -0.356012  
 C 4.399673 0.000016 -0.037075  
 C 0.585528 3.020190 -0.352507  
 C -1.135792 -0.002020 3.110266  
 H 1.068841 -3.803135 0.248693  
 H 0.942841 -3.127335 -1.386481

|                           |           |           |           |
|---------------------------|-----------|-----------|-----------|
| H                         | -0.489179 | -3.227673 | -0.366670 |
| H                         | -0.531970 | -0.003796 | 4.028042  |
| H                         | -1.779843 | -0.888648 | 3.134973  |
| H                         | -1.778204 | 0.885713  | 3.137353  |
| H                         | 1.068893  | 3.802684  | 0.253012  |
| H                         | 0.942688  | 3.128732  | -1.382893 |
| H                         | -0.489213 | 3.227953  | -0.362811 |
| H                         | 4.881471  | 0.000252  | 0.950751  |
| H                         | 4.764013  | -0.887826 | -0.569795 |
| H                         | 4.763841  | 0.887726  | -0.570137 |
| H                         | -0.537773 | -2.079606 | 1.708507  |
| H                         | -0.537929 | 2.077355  | 1.710795  |
| H                         | 2.862147  | 2.029831  | -0.379683 |
| H                         | 2.862307  | -2.029651 | -0.381658 |
| el energy= -892.185219784 |           |           |           |
| zpe= -891.913395          |           |           |           |
| th energy= -891.892696    |           |           |           |
| th enthalpy= -891.891752  |           |           |           |
| free energy= -891.962076  |           |           |           |

#### TS-F

|    |           |           |           |
|----|-----------|-----------|-----------|
| C  | 0.195152  | 1.303588  | -1.516431 |
| C  | 0.589509  | -0.000295 | -1.902516 |
| C  | 0.183712  | -1.301525 | -1.519302 |
| C  | -1.155107 | -1.739575 | -1.073947 |
| C  | -1.819852 | -1.231960 | -0.026630 |
| C  | -1.319747 | 0.005179  | 0.669695  |
| C  | -1.809407 | 1.247603  | -0.024718 |
| C  | -1.140090 | 1.751846  | -1.070726 |
| Cr | 0.785286  | -0.003662 | 0.254282  |
| C  | 1.615529  | 1.528754  | 0.795533  |

#### PBEPBE/auto/BS1

##### II

|    |           |           |           |
|----|-----------|-----------|-----------|
| C  | 2.558381  | 0.131923  | -0.079889 |
| C  | 1.431314  | 1.025845  | -0.483668 |
| C  | 0.623703  | 1.730889  | 0.446958  |
| C  | 0.008837  | 1.140956  | 1.612852  |
| C  | -0.295740 | -0.201070 | 1.978810  |
| C  | -0.000650 | -1.432027 | 1.271973  |
| C  | 0.957477  | -1.736742 | 0.289486  |
| C  | 2.314373  | -1.136960 | 0.276743  |
| Cr | -0.610811 | 0.048842  | -0.241843 |
| C  | -0.184405 | -0.529210 | -1.931142 |
| C  | -2.193244 | -0.891681 | -0.224401 |
| C  | -1.734349 | 1.333777  | -0.909564 |
| O  | 0.132619  | -0.914654 | -2.989539 |
| O  | -3.222096 | -1.451896 | -0.247988 |
| O  | -2.501404 | 2.096765  | -1.361355 |
| C  | 3.931510  | 0.758520  | -0.079917 |
| C  | 0.317717  | 3.200471  | 0.205321  |
| C  | -1.236736 | -0.373981 | 3.163168  |
| C  | 0.858218  | -3.087294 | -0.397231 |
| H  | 3.978799  | 1.615669  | 0.620259  |
| H  | 4.184474  | 1.159144  | -1.081489 |
| H  | 4.712665  | 0.033671  | 0.207745  |
| H  | 1.584370  | -3.799084 | 0.045217  |
| H  | 1.106946  | -3.002200 | -1.470660 |
| H  | -0.152804 | -3.521985 | -0.314398 |
| H  | -2.044599 | -1.090696 | 2.930329  |
| H  | -1.701714 | 0.577966  | 3.468689  |
| H  | -0.681422 | -0.777303 | 4.031790  |

|                           |           |           |           |
|---------------------------|-----------|-----------|-----------|
| C                         | 0.487754  | -0.004194 | 2.039654  |
| C                         | 1.601734  | -1.544320 | 0.793131  |
| O                         | 2.205406  | 2.467875  | 1.110960  |
| O                         | 0.313782  | -0.004652 | 3.184463  |
| O                         | 2.182840  | -2.489282 | 1.107403  |
| C                         | 1.033240  | 2.442579  | -2.064396 |
| C                         | 1.011989  | -2.446587 | -2.069599 |
| C                         | -3.089841 | -1.848358 | 0.483847  |
| C                         | -3.074940 | 1.872930  | 0.485980  |
| H                         | 2.059733  | 2.131668  | -2.290137 |
| H                         | 1.080182  | 3.281836  | -1.360874 |
| H                         | 0.587233  | 2.823761  | -2.995586 |
| H                         | -3.351143 | 2.759152  | -0.096931 |
| H                         | -2.957384 | 2.177870  | 1.536043  |
| H                         | -3.918624 | 1.169407  | 0.457198  |
| H                         | -3.928318 | -1.138590 | 0.456089  |
| H                         | -3.372812 | -2.731948 | -0.099802 |
| H                         | -2.974165 | -2.155169 | 1.533575  |
| H                         | 0.562775  | -2.822003 | -3.001587 |
| H                         | 2.041141  | -2.144077 | -2.294648 |
| H                         | 1.051623  | -3.287647 | -1.367778 |
| H                         | -1.527852 | 2.640831  | -1.574073 |
| H                         | -1.720217 | 0.006234  | 1.690786  |
| H                         | -1.550111 | -2.624660 | -1.578523 |
| H                         | 1.597041  | -0.004299 | -2.336577 |
| el energy= -892.146807420 |           |           |           |
| zpe= -891.873611          |           |           |           |
| th energy= -891.853765    |           |           |           |
| th enthalpy= -891.852821  |           |           |           |
| free energy= -891.920639  |           |           |           |

|                           |           |           |           |
|---------------------------|-----------|-----------|-----------|
| H                         | -0.663974 | 3.505384  | 0.606783  |
| H                         | 0.334499  | 3.432803  | -0.873296 |
| H                         | 1.095841  | 3.823298  | 0.689335  |
| H                         | 3.134480  | -1.806733 | 0.582719  |
| H                         | -0.720807 | -2.230951 | 1.503363  |
| H                         | -0.544035 | 1.871783  | 2.219172  |
| H                         | 1.625363  | 1.594814  | -1.407262 |
| el energy= -892.262116341 |           |           |           |
| zpe= -891.996490          |           |           |           |
| th energy= -891.975575    |           |           |           |
| th enthalpy= -891.974630  |           |           |           |
| free energy= -892.044549  |           |           |           |

#### TS-A

|    |           |           |           |
|----|-----------|-----------|-----------|
| C  | -2.613263 | 0.004616  | -0.321206 |
| C  | -1.444914 | -0.866674 | -0.664273 |
| C  | -0.804708 | -1.650319 | 0.356778  |
| C  | -0.295804 | -1.058850 | 1.552196  |
| C  | 0.036457  | 0.300190  | 1.919963  |
| C  | -0.127020 | 1.513717  | 1.173299  |
| C  | -0.975214 | 1.799346  | 0.069339  |
| C  | -2.363350 | 1.276323  | 0.008856  |
| Cr | 0.614787  | -0.036388 | -0.220210 |
| C  | 0.984893  | -1.048985 | -1.700807 |
| C  | 1.489501  | 1.257445  | -1.179224 |
| C  | 2.267772  | -0.514899 | 0.429509  |
| O  | 1.222885  | -1.702167 | -2.644057 |
| O  | 2.080338  | 2.057260  | -1.800802 |

|                           |           |           |           |
|---------------------------|-----------|-----------|-----------|
| O                         | 3.317197  | -0.832866 | 0.839304  |
| C                         | -3.977480 | -0.638724 | -0.333437 |
| C                         | -0.574199 | -3.137091 | 0.156516  |
| C                         | 0.850529  | 0.423747  | 3.201003  |
| C                         | -0.788767 | 3.138066  | -0.621747 |
| H                         | -4.030260 | -1.471772 | 0.395177  |
| H                         | -4.203532 | -1.076613 | -1.325572 |
| H                         | -4.774583 | 0.084015  | -0.086791 |
| H                         | -1.554280 | 3.854608  | -0.258449 |
| H                         | -0.932225 | 3.045340  | -1.712768 |
| H                         | 0.206998  | 3.575698  | -0.442231 |
| H                         | 0.167534  | 0.477060  | 4.070865  |
| H                         | 1.523318  | -0.437388 | 3.354724  |
| H                         | 1.461982  | 1.341754  | 3.204716  |
| H                         | -1.478533 | -3.703099 | 0.455660  |
| H                         | -0.388454 | -3.361270 | -0.908379 |
| H                         | 0.281922  | -3.516531 | 0.741004  |
| H                         | -3.165145 | 1.983866  | 0.278139  |
| H                         | 0.578162  | 2.304489  | 1.469417  |
| H                         | 0.169540  | -1.786412 | 2.231720  |
| H                         | -1.567300 | -1.405692 | -1.618352 |
| el energy= -892.243386222 |           |           |           |
| zpe= -891.978555          |           |           |           |
| th energy= -891.958304    |           |           |           |
| th enthalpy= -891.957360  |           |           |           |
| free energy= -892.025422  |           |           |           |

#### TS-B

|    |           |           |           |
|----|-----------|-----------|-----------|
| C  | -0.013843 | 2.233859  | 1.243549  |
| C  | -0.155261 | 2.869280  | 0.000000  |
| C  | -0.013843 | 2.233859  | -1.243549 |
| C  | -0.163900 | 0.841985  | -1.560995 |
| C  | -1.287799 | -0.035073 | -1.274302 |
| C  | -1.871821 | -0.281064 | 0.000000  |
| C  | -1.287799 | -0.035073 | 1.274302  |
| C  | -0.163900 | 0.841985  | 1.560995  |
| Cr | 0.270961  | -0.807375 | 0.000000  |
| C  | 2.093925  | -0.457344 | 0.000000  |
| C  | 0.438856  | -2.183192 | 1.190692  |
| C  | 0.438856  | -2.183192 | -1.190692 |
| O  | 3.233039  | -0.201151 | 0.000000  |
| O  | 0.561997  | -3.093507 | 1.922840  |
| O  | 0.561997  | -3.093507 | -1.922840 |
| C  | 0.436443  | 3.099313  | 2.401175  |
| C  | 0.436443  | 3.099313  | -2.401175 |
| C  | -1.931337 | -0.712004 | -2.471708 |
| C  | -1.931337 | -0.712004 | 2.471708  |
| H  | 0.667007  | 4.133906  | 2.098016  |
| H  | 1.337936  | 2.661693  | 2.871807  |
| H  | -0.339878 | 3.127931  | 3.190844  |
| H  | -2.629597 | -0.013537 | 2.973853  |
| H  | -1.172115 | -1.010751 | 3.215161  |
| H  | -2.496780 | -1.613575 | 2.178195  |
| H  | -2.496780 | -1.613575 | -2.178195 |
| H  | -2.629597 | -0.013537 | -2.973853 |
| H  | -1.172115 | -1.010751 | -3.215161 |
| H  | -0.339878 | 3.127931  | -3.190844 |
| H  | 0.667007  | 4.133906  | -2.098016 |
| H  | 1.337936  | 2.661693  | -2.871807 |
| H  | 0.269132  | 0.602131  | 2.544274  |
| H  | -2.718991 | -0.978649 | 0.000000  |

|                           |           |          |           |
|---------------------------|-----------|----------|-----------|
| H                         | 0.269132  | 0.602131 | -2.544274 |
| H                         | -0.053827 | 3.961478 | 0.000000  |
| el energy= -892.245859145 |           |          |           |
| zpe= -891.981232          |           |          |           |
| th energy= -891.960778    |           |          |           |
| th enthalpy= -891.959834  |           |          |           |
| free energy= -892.029126  |           |          |           |

#### TS-C

|                           |           |           |           |
|---------------------------|-----------|-----------|-----------|
| C                         | 1.576459  | 1.722250  | 0.243140  |
| C                         | 0.231684  | 1.622375  | 0.855217  |
| C                         | -0.429294 | 0.720540  | 1.729926  |
| C                         | -0.380300 | -0.720339 | 1.718723  |
| C                         | 0.328082  | -1.659685 | 0.931776  |
| C                         | 1.696635  | -1.638188 | 0.387834  |
| C                         | 2.612185  | -0.685414 | 0.030559  |
| C                         | 2.524666  | 0.781311  | -0.045358 |
| Cr                        | -0.708904 | -0.004143 | -0.310506 |
| C                         | -0.957424 | 1.267638  | -1.637254 |
| C                         | -0.913132 | -1.374823 | -1.542820 |
| C                         | -2.486406 | -0.033993 | -0.107937 |
| O                         | -1.150551 | 2.069840  | -2.464971 |
| O                         | -1.066152 | -2.241771 | -2.311383 |
| O                         | -3.654103 | -0.053462 | 0.034376  |
| C                         | 1.871521  | 3.153483  | -0.173634 |
| C                         | -1.504639 | 1.315519  | 2.627940  |
| C                         | -0.205928 | -3.089337 | 1.019850  |
| C                         | 3.958017  | -1.185273 | -0.466334 |
| H                         | 1.822182  | 3.841296  | 0.693217  |
| H                         | 1.112258  | 3.505448  | -0.900462 |
| H                         | 2.864401  | 3.255451  | -0.641670 |
| H                         | 4.779089  | -0.765792 | 0.148405  |
| H                         | 4.146016  | -0.849841 | -1.505557 |
| H                         | 4.035918  | -2.284564 | -0.439835 |
| H                         | 0.381840  | -3.672827 | 1.755851  |
| H                         | -1.266160 | -3.116220 | 1.320401  |
| H                         | -0.117317 | -3.605758 | 0.047342  |
| H                         | -2.364451 | 0.635442  | 2.757632  |
| H                         | -1.080361 | 1.516816  | 3.631128  |
| H                         | -1.882438 | 2.271912  | 2.228281  |
| H                         | 3.429461  | 1.206815  | -0.501552 |
| H                         | 2.043544  | -2.664104 | 0.199394  |
| H                         | -1.217918 | -1.162137 | 2.275255  |
| H                         | -0.238683 | 2.614250  | 0.890380  |
| el energy= -892.235458690 |           |           |           |
| zpe= -891.970046          |           |           |           |
| th energy= -891.949575    |           |           |           |
| th enthalpy= -891.948631  |           |           |           |
| free energy= -892.018088  |           |           |           |

#### TS-D

|    |           |           |           |
|----|-----------|-----------|-----------|
| C  | -1.859301 | -0.786930 | -1.373056 |
| C  | -0.655835 | -1.431964 | -0.767088 |
| C  | -0.449583 | -1.661794 | 0.607114  |
| C  | -1.145988 | -0.949922 | 1.687270  |
| C  | -1.398785 | 0.389661  | 1.828786  |
| C  | -1.081105 | 1.451150  | 0.848140  |
| C  | -1.440284 | 1.539238  | -0.477452 |
| Cr | -2.211819 | 0.509957  | -1.207105 |
| Cr | 0.798621  | 0.145433  | -0.173969 |
| C  | 1.918013  | -0.577116 | -1.373598 |

|                           |           |           |           |
|---------------------------|-----------|-----------|-----------|
| C                         | 1.799662  | 1.679155  | -0.317564 |
| C                         | 1.979784  | -0.393207 | 1.065960  |
| O                         | 2.642257  | -1.056093 | -2.170294 |
| O                         | 2.480827  | 2.627603  | -0.428260 |
| O                         | 2.747936  | -0.749008 | 1.884321  |
| C                         | -2.663450 | -1.705502 | -2.264908 |
| C                         | 0.302523  | -2.907400 | 1.044611  |
| C                         | -1.930526 | 0.921057  | 3.142682  |
| C                         | -1.187086 | 2.817832  | -1.251161 |
| H                         | -3.021089 | -2.589002 | -1.701459 |
| H                         | -2.035089 | -2.095404 | -3.089773 |
| H                         | -3.535470 | -1.193748 | -2.706657 |
| H                         | -2.152995 | 3.280937  | -1.536570 |
| H                         | -0.643646 | 2.616938  | -2.192474 |
| H                         | -0.609886 | 3.551392  | -0.663894 |
| H                         | -2.890963 | 1.452570  | 2.997816  |
| H                         | -2.084935 | 0.114736  | 3.879374  |
| H                         | -1.227912 | 1.657892  | 3.579967  |
| H                         | -0.421937 | -3.706496 | 1.304184  |
| H                         | 0.948091  | -3.285729 | 0.234434  |
| H                         | 0.934916  | -2.729759 | 1.931822  |
| H                         | -3.095502 | 0.885530  | -1.746406 |
| H                         | -0.625273 | 2.349591  | 1.292275  |
| H                         | -1.338831 | -1.566513 | 2.579509  |
| H                         | -0.191856 | -2.178645 | -1.428821 |
| el energy= -892.226613058 |           |           |           |
| zpe= -891.962625          |           |           |           |
| th energy= -891.941714    |           |           |           |
| th enthalpy= -891.940770  |           |           |           |
| free energy= -892.011671  |           |           |           |

#### TS-E

|    |           |           |           |
|----|-----------|-----------|-----------|
| C  | 0.914012  | -1.649231 | 0.194455  |
| C  | 2.261758  | -1.230613 | -0.021612 |
| C  | 2.932241  | 0.000134  | 0.055340  |
| C  | 2.261668  | 1.230836  | -0.020190 |
| C  | 0.913724  | 1.648955  | 0.196235  |
| C  | 0.051909  | 1.257771  | 1.287519  |
| C  | -0.223533 | -0.001132 | 1.899929  |
| C  | 0.051968  | -1.259248 | 1.285989  |
| Cr | -0.784344 | 0.000158  | -0.229907 |
| C  | -2.182187 | -1.173775 | -0.297052 |
| C  | -2.182300 | 1.174003  | -0.296247 |
| C  | -0.521679 | 0.001265  | -2.086215 |
| O  | -3.112600 | -1.888444 | -0.344750 |
| O  | -3.112639 | 1.888750  | -0.343748 |
| O  | -0.347129 | 0.002074  | -3.238124 |
| C  | 0.603036  | -3.042362 | -0.363315 |
| C  | 4.444517  | 0.000169  | -0.072039 |
| C  | 0.602618  | 3.042715  | -0.360029 |
| C  | -1.104601 | -0.002181 | 3.135257  |
| H  | 1.057665  | -3.838249 | 0.261567  |
| H  | 0.992051  | -3.158951 | -1.389646 |
| H  | -0.482983 | -3.228621 | -0.403824 |
| H  | -0.485817 | -0.005739 | 4.053257  |
| H  | -1.753803 | -0.894775 | 3.167361  |
| H  | -1.749905 | 0.893044  | 3.171690  |

|                           |           |           |           |
|---------------------------|-----------|-----------|-----------|
| H                         | 0.991019  | 3.160233  | -1.386486 |
| H                         | -0.483393 | 3.229184  | -0.399722 |
| H                         | 1.057771  | 3.837933  | 0.265329  |
| H                         | 4.809035  | -0.893350 | -0.611684 |
| H                         | 4.809289  | 0.895997  | -0.607641 |
| H                         | 4.935226  | -0.002148 | 0.920766  |
| H                         | -0.520529 | -2.094960 | 1.718110  |
| H                         | -0.520607 | 2.092920  | 1.720693  |
| H                         | 2.904555  | 2.051520  | -0.387272 |
| H                         | 2.904721  | -2.050701 | -0.389898 |
| el energy= -892.230238929 |           |           |           |
| zpe= -891.967386          |           |           |           |
| th energy= -891.946100    |           |           |           |
| th enthalpy= -891.945156  |           |           |           |
| free energy= -892.016913  |           |           |           |

#### TS-F

|                           |           |           |           |
|---------------------------|-----------|-----------|-----------|
| C                         | 0.154148  | 1.315713  | -1.553447 |
| C                         | 0.565700  | 0.000440  | -1.925259 |
| C                         | 0.155950  | -1.315391 | -1.553376 |
| C                         | -1.170576 | -1.763686 | -1.073389 |
| C                         | -1.836647 | -1.257794 | -0.006527 |
| C                         | -1.372206 | -0.000939 | 0.679910  |
| C                         | -1.838157 | 1.255453  | -0.006266 |
| C                         | -1.172830 | 1.762275  | -1.073182 |
| Cr                        | 0.753959  | 0.000424  | 0.252914  |
| C                         | 1.622375  | 1.519596  | 0.773155  |
| C                         | 0.555430  | 0.000208  | 2.063074  |
| C                         | 1.624126  | -1.517678 | 0.773166  |
| O                         | 2.258183  | 2.456632  | 1.080277  |
| O                         | 0.428214  | -0.000006 | 3.231710  |
| O                         | 2.260970  | -2.454010 | 1.080320  |
| C                         | 0.987974  | 2.462206  | -2.115975 |
| C                         | 0.991281  | -2.460767 | -2.115933 |
| C                         | -3.067413 | -1.927486 | 0.555148  |
| C                         | -3.069317 | 1.923998  | 0.555906  |
| H                         | 2.011293  | 2.142598  | -2.378104 |
| H                         | 1.065484  | 3.298406  | -1.399202 |
| H                         | 0.512972  | 2.861064  | -3.035288 |
| H                         | -3.345213 | 2.823588  | -0.021874 |
| H                         | -2.900652 | 2.230116  | 1.607655  |
| H                         | -3.940108 | 1.239533  | 0.565737  |
| H                         | -3.939298 | -1.244364 | 0.562885  |
| H                         | -3.341231 | -2.828334 | -0.021659 |
| H                         | -2.899576 | -2.231784 | 1.607545  |
| H                         | 0.516929  | -2.860074 | -3.035385 |
| H                         | 2.014263  | -2.139872 | -2.377819 |
| H                         | 1.069688  | -3.296964 | -1.399258 |
| H                         | -1.554086 | 2.683356  | -1.541187 |
| H                         | -1.742698 | -0.001240 | 1.720398  |
| H                         | -1.550664 | -2.685142 | -1.541598 |
| H                         | 1.569917  | 0.001122  | -2.383286 |
| el energy= -892.193987396 |           |           |           |
| zpe= -891.930296          |           |           |           |
| th energy= -891.909788    |           |           |           |
| th enthalpy= -891.908844  |           |           |           |
| free energy= -891.978007  |           |           |           |

**B3LYP/BS1**

II

|    |           |           |           |
|----|-----------|-----------|-----------|
| C  | 0.578212  | 1.719731  | 0.549062  |
| C  | -0.023827 | 1.051563  | 1.674651  |
| C  | -0.285753 | -0.302932 | 1.959354  |
| C  | 0.069163  | -1.490628 | 1.205908  |
| C  | 1.053771  | -1.749549 | 0.267091  |
| C  | 2.366203  | -1.067144 | 0.223970  |
| C  | 2.548882  | 0.214878  | -0.087376 |
| C  | 1.405992  | 1.117557  | -0.411765 |
| Cr | -0.646792 | 0.055748  | -0.272289 |
| C  | -1.786560 | 1.383109  | -0.875369 |
| C  | -0.219520 | -0.450244 | -2.004864 |
| C  | -2.202199 | -0.968429 | -0.256784 |
| O  | -2.537686 | 2.170128  | -1.269703 |
| O  | 0.108108  | -0.788320 | -3.060674 |
| O  | -3.184516 | -1.578366 | -0.256175 |
| C  | 0.229054  | 3.192412  | 0.399264  |
| C  | -1.203542 | -0.578721 | 3.141597  |
| C  | 1.022981  | -3.081159 | -0.457951 |
| C  | 3.910834  | 0.866905  | -0.118768 |
| H  | 0.960866  | 3.796520  | 0.956038  |
| H  | -0.768814 | 3.435729  | 0.779924  |
| H  | 0.280237  | 3.503402  | -0.649737 |
| H  | 3.970298  | 1.692383  | 0.605536  |
| H  | 4.113999  | 1.302666  | -1.108090 |
| H  | 4.708642  | 0.150799  | 0.109417  |
| H  | 1.817384  | -3.741525 | -0.077623 |
| H  | 0.061739  | -3.593712 | -0.341213 |
| H  | 1.209770  | -2.945282 | -1.530764 |
| H  | -0.629404 | -1.011859 | 3.973065  |
| H  | -1.691302 | 0.331354  | 3.505380  |
| H  | -1.985500 | -1.300878 | 2.876956  |
| H  | 1.593372  | 1.751101  | -1.281876 |
| H  | 3.223154  | -1.703448 | 0.460657  |
| H  | -0.633940 | -2.306419 | 1.377922  |
| H  | -0.576890 | 1.729582  | 2.323644  |

el energy= -893.191300325

zpe= -892.918704

th energy= -892.898013

th enthalpy= -892.897069

free energy= -892.966648

TS-A

|    |           |           |           |
|----|-----------|-----------|-----------|
| C  | -2.599949 | -0.057461 | -0.294655 |
| C  | -1.433771 | -0.940488 | -0.609190 |
| C  | -0.767697 | -1.661902 | 0.422409  |
| C  | -0.246854 | -1.032610 | 1.584664  |
| C  | 0.066373  | 0.329561  | 1.907410  |
| C  | -0.149757 | 1.526378  | 1.152789  |
| C  | -1.030637 | 1.805890  | 0.097449  |
| C  | -2.387282 | 1.216434  | 0.015791  |
| Cr | 0.645845  | -0.035891 | -0.259180 |
| C  | 1.461162  | 1.309705  | -1.236129 |
| C  | 2.321255  | -0.493434 | 0.401376  |
| C  | 0.977852  | -1.087719 | -1.746829 |
| O  | 1.977136  | 2.147332  | -1.846323 |
| O  | 3.348908  | -0.794548 | 0.836398  |
| O  | 1.158813  | -1.762281 | -2.668977 |
| C  | -3.960886 | -0.709352 | -0.318505 |
| C  | -0.510188 | -3.149618 | 0.261962  |

|   |           |           |           |
|---|-----------|-----------|-----------|
| C | 0.887227  | 0.506644  | 3.177742  |
| C | -0.902098 | 3.150643  | -0.591808 |
| H | -4.019891 | -1.525236 | 0.416895  |
| H | -4.166317 | -1.157745 | -1.301487 |
| H | -4.759006 | 0.008769  | -0.097105 |
| H | -1.689181 | 3.830539  | -0.228732 |
| H | -1.042050 | 3.053166  | -1.675106 |
| H | 0.068040  | 3.625099  | -0.414791 |
| H | 0.216341  | 0.602031  | 4.043622  |
| H | 1.552763  | -0.343284 | 3.364103  |
| H | 1.498816  | 1.414324  | 3.136879  |
| H | -1.391547 | -3.719024 | 0.592570  |
| H | -0.339661 | -3.402047 | -0.790553 |
| H | 0.356017  | -3.492165 | 0.839181  |
| H | -3.212589 | 1.892836  | 0.256676  |
| H | 0.548838  | 2.322199  | 1.413844  |
| H | 0.226290  | -1.730041 | 2.275215  |
| H | -1.574511 | -1.518080 | -1.526507 |

el energy= -893.169934552

zpe= -892.898189

th energy= -892.878188

th enthalpy= -892.877244

free energy= -892.944715

TS-B

|    |           |           |           |
|----|-----------|-----------|-----------|
| C  | -0.023863 | 2.217057  | 1.242410  |
| C  | -0.147530 | 2.846140  | 0.000000  |
| C  | -0.023863 | 2.217057  | -1.242410 |
| C  | -0.204835 | 0.842264  | -1.581016 |
| C  | -1.306158 | -0.040552 | -1.268716 |
| C  | -1.877345 | -0.293543 | 0.000000  |
| C  | -1.306158 | -0.040552 | 1.268716  |
| C  | -0.204835 | 0.842264  | 1.581016  |
| Cr | 0.286899  | -0.819614 | 0.000000  |
| C  | 2.126944  | -0.438820 | 0.000000  |
| C  | 0.465143  | -2.183955 | 1.238903  |
| C  | 0.465143  | -2.183955 | -1.238903 |
| O  | 3.242822  | -0.150501 | 0.000000  |
| O  | 0.590438  | -3.052885 | 1.994031  |
| O  | 0.590438  | -3.052885 | -1.994031 |
| C  | 0.440082  | 3.086978  | 2.392969  |
| C  | 0.440082  | 3.086978  | -2.392969 |
| C  | -1.961943 | -0.721585 | -2.457910 |
| C  | -1.961943 | -0.721585 | 2.457910  |
| H  | 0.691103  | 4.104647  | 2.078150  |
| H  | 1.325662  | 2.641339  | 2.866859  |
| H  | -0.335102 | 3.141851  | 3.170793  |
| H  | -2.665713 | -0.029612 | 2.943795  |
| H  | -1.219101 | -1.011857 | 3.209123  |
| H  | -2.515476 | -1.619599 | 2.160920  |
| H  | -2.515476 | -1.619599 | -2.160920 |
| H  | -2.665713 | -0.029612 | -2.943795 |
| H  | -1.219101 | -1.011857 | -3.209123 |
| H  | -0.335102 | 3.141851  | -3.170793 |
| H  | 0.691103  | 4.104647  | -2.078150 |
| H  | 1.325662  | 2.641339  | -2.866859 |
| H  | 0.195339  | 0.618504  | 2.571268  |
| H  | -2.720558 | -0.981270 | 0.000000  |
| H  | 0.195339  | 0.618504  | -2.571268 |
| H  | -0.021577 | 3.926505  | 0.000000  |

el energy= -893.174501287  
 zpe= -892.903215  
 th energy= -892.882966  
 th enthalpy= -892.882022  
 free energy= -892.950901

#### TS-C

|    |           |           |           |
|----|-----------|-----------|-----------|
| C  | -1.566071 | 1.716923  | -0.268948 |
| C  | -0.215012 | 1.626545  | -0.868021 |
| C  | 0.454393  | 0.731158  | -1.721701 |
| C  | 0.404181  | -0.705970 | -1.725442 |
| C  | -0.306926 | -1.648792 | -0.970260 |
| C  | -1.676548 | -1.631028 | -0.423529 |
| C  | -2.583349 | -0.689384 | -0.058507 |
| C  | -2.502349 | 0.778129  | 0.015390  |
| Cr | 0.729878  | -0.005937 | 0.334160  |
| C  | 0.912117  | 1.272198  | 1.698066  |
| C  | 0.859053  | -1.397789 | 1.589378  |
| C  | 2.538331  | -0.033860 | 0.135242  |
| O  | 1.032821  | 2.061083  | 2.530328  |
| O  | 0.936054  | -2.258268 | 2.352995  |
| O  | 3.688256  | -0.052175 | -0.010113 |
| C  | -1.886253 | 3.152554  | 0.114423  |
| C  | 1.535018  | 1.327299  | -2.612982 |
| C  | 0.210784  | -3.081879 | -1.086177 |
| C  | -3.928894 | -1.190516 | 0.439259  |
| H  | -1.842289 | 3.814180  | -0.762888 |
| H  | -1.147017 | 3.532635  | 0.834860  |
| H  | -2.878609 | 3.246553  | 0.566316  |
| H  | -4.745094 | -0.772735 | -0.168533 |
| H  | -4.111811 | -0.864590 | 1.473821  |
| H  | -4.004294 | -2.281902 | 0.406742  |
| H  | -0.391546 | -3.645929 | -1.813865 |
| H  | 1.256665  | -3.115081 | -1.406615 |
| H  | 0.135605  | -3.608149 | -0.126947 |
| H  | 1.124888  | 1.508575  | -3.617253 |
| H  | 1.893763  | 2.286409  | -2.224472 |
| H  | 2.397846  | 0.660686  | -2.722704 |
| H  | -3.408096 | 1.194141  | 0.455925  |
| H  | -2.022514 | -2.650845 | -0.255633 |
| H  | 1.239887  | -1.136084 | -2.275281 |
| H  | 0.237641  | 2.615984  | -0.906152 |

el energy= -893.169530211  
 zpe= -892.897022  
 th energy= -892.876881  
 th enthalpy= -892.875937  
 free energy= -892.944553

#### TS-D

|    |           |           |           |
|----|-----------|-----------|-----------|
| C  | -1.697599 | -0.719456 | -1.540725 |
| C  | -0.584084 | -1.423523 | -0.844601 |
| C  | -0.488826 | -1.699573 | 0.513385  |
| C  | -1.317698 | -1.070480 | 1.556094  |
| C  | -1.627143 | 0.234234  | 1.739898  |
| C  | -1.207306 | 1.363218  | 0.874239  |
| C  | -1.443261 | 1.549191  | -0.453420 |
| C  | -2.084153 | 0.554376  | -1.337420 |
| Cr | 0.878438  | 0.157869  | -0.071210 |
| C  | 1.990139  | -0.400734 | -1.398605 |
| C  | 1.830253  | 1.751028  | 0.004333  |
| C  | 2.049811  | -0.526222 | 1.143405  |

|   |           |           |           |
|---|-----------|-----------|-----------|
| O | 2.677814  | -0.763479 | -2.262365 |
| O | 2.444445  | 2.731594  | 0.043215  |
| O | 2.782462  | -0.952054 | 1.938327  |
| C | -2.373533 | -1.566212 | -2.596955 |
| C | 0.240810  | -2.953746 | 0.963225  |
| C | -2.381077 | 0.674200  | 2.976187  |
| C | -1.162564 | 2.889106  | -1.102908 |
| H | -2.791103 | -2.482499 | -2.156225 |
| H | -1.647689 | -1.886507 | -3.358451 |
| H | -3.181131 | -1.023345 | -3.100252 |
| H | -2.107609 | 3.343256  | -1.436987 |
| H | -0.532416 | 2.778207  | -1.994194 |
| H | -0.672576 | 3.584301  | -0.413697 |
| H | -3.315226 | 1.187263  | 2.706423  |
| H | -2.627351 | -0.174258 | 3.623687  |
| H | -1.786825 | 1.391189  | 3.561820  |
| H | -0.488128 | -3.765216 | 1.117475  |
| H | 0.960712  | -3.286228 | 0.208451  |
| H | 0.777515  | -2.810130 | 1.907201  |
| H | -2.886089 | 0.951557  | -1.963469 |
| H | -0.806113 | 2.217905  | 1.423575  |
| H | -1.626807 | -1.756501 | 2.348293  |
| H | -0.052080 | -2.118783 | -1.494822 |

el energy= -893.165191791  
 zpe= -892.894111  
 th energy= -892.873513  
 th enthalpy= -892.872569  
 free energy= -892.942677

#### TS-E

|    |           |           |           |
|----|-----------|-----------|-----------|
| C  | -0.233088 | 0.910408  | 1.665850  |
| C  | 0.015259  | 2.238076  | 1.229690  |
| C  | -0.041977 | 2.900650  | 0.000000  |
| C  | 0.015259  | 2.238076  | -1.229690 |
| C  | -0.233088 | 0.910408  | -1.665850 |
| C  | -1.299621 | 0.039934  | -1.253282 |
| C  | -1.901532 | -0.239587 | 0.000000  |
| C  | -1.299621 | 0.039934  | 1.253282  |
| Cr | 0.245613  | -0.797803 | 0.000000  |
| C  | 0.329997  | -2.185485 | 1.228215  |
| C  | 0.329997  | -2.185485 | -1.228215 |
| C  | 2.121620  | -0.502778 | 0.000000  |
| O  | 0.389189  | -3.071713 | 1.969200  |
| O  | 0.389189  | -3.071713 | -1.969200 |
| O  | 3.251930  | -0.292034 | 0.000000  |
| C  | 0.276505  | 0.621764  | 3.082719  |
| C  | 0.121487  | 4.410406  | 0.000000  |
| C  | 0.276505  | 0.621764  | -3.082719 |
| C  | -3.141768 | -1.114353 | 0.000000  |
| H  | -0.376320 | 1.077143  | 3.844429  |
| H  | 1.286888  | 1.019346  | 3.232028  |
| H  | 0.319925  | -0.452602 | 3.287758  |
| H  | -4.050980 | -0.496407 | 0.000000  |
| H  | -3.179996 | -1.756879 | 0.887594  |
| H  | -3.179996 | -1.756879 | -0.887594 |
| H  | -0.376320 | 1.077143  | -3.844429 |
| H  | 1.286888  | 1.019346  | -3.232028 |
| H  | 0.319925  | -0.452602 | -3.287758 |
| H  | 0.665242  | 4.759135  | 0.887764  |
| H  | 0.665242  | 4.759135  | -0.887764 |
| H  | -0.851445 | 4.923236  | 0.000000  |

H -1.734537 -0.531207 2.076242  
 H -1.734537 -0.531207 -2.076242  
 H 0.393621 2.875942 -2.036346  
 H 0.393621 2.875942 2.036346  
 el energy= -893.158036811  
 zpe= -892.888629  
 th energy= -892.867584  
 th enthalpy= -892.866640  
 free energy= -892.937776

TS-F

C -0.126400 -1.308173 -1.547917  
 C -0.533387 -0.000642 -1.914027  
 C -0.131805 1.307932 -1.544406  
 C 1.191702 1.756078 -1.055132  
 C 1.840857 1.251768 0.007663  
 C 1.348444 0.002558 0.696386  
 C 1.841025 -1.248480 0.012518  
 C 1.194644 -1.754570 -1.051666  
 Cr -0.797081 0.001824 0.283343  
 C -1.675386 -1.564814 0.747473  
 C -0.553346 -0.005798 2.106304  
 C -1.669343 1.568277 0.756664  
 O -2.307613 -2.497433 1.002335  
 O -0.393384 -0.009572 3.253938  
 O -2.299055 2.501494 1.015847

C -0.939336 -2.452075 -2.144203  
 C -0.948930 2.450069 -2.138449  
 C 3.092885 1.894958 0.552940  
 C 3.087847 -1.895328 0.565322  
 H -1.955566 -2.142543 -2.413838  
 H -1.015125 -3.299446 -1.452869  
 H -0.451072 -2.823702 -3.058703  
 H 3.366313 -2.789906 -0.004414  
 H 2.937596 -2.192159 1.614096  
 H 3.943810 -1.205289 0.556066  
 H 3.946470 1.202000 0.539831  
 H 3.371285 2.787726 -0.019675  
 H 2.949509 2.193864 1.602075  
 H -0.464334 2.822907 -3.054439  
 H -1.965342 2.138309 -2.404965  
 H -1.024564 3.297206 -1.446818  
 H 1.588472 -2.654508 -1.529567  
 H 1.721093 0.004724 1.726112  
 H 1.585632 2.652949 -1.538783  
 H -1.520633 -0.002367 -2.388131  
 el energy= -893.116737517  
 zpe= -892.846219  
 th energy= -892.825942  
 th enthalpy= -892.824998  
 free energy= -892.895198



# Molecular Coordinates for (TMCOT)Mo(CO)<sub>3</sub> (Å)

## PBE0/BS1

II

|    |           |           |           |
|----|-----------|-----------|-----------|
| C  | 2.649382  | 0.131574  | -0.268016 |
| C  | 1.526790  | 1.066024  | -0.545696 |
| C  | 0.803913  | 1.740549  | 0.455026  |
| C  | 0.289374  | 1.145081  | 1.668052  |
| C  | 0.020426  | -0.184350 | 2.070104  |
| C  | 0.252580  | -1.428175 | 1.362758  |
| C  | 1.092251  | -1.730556 | 0.290992  |
| C  | 2.428959  | -1.121141 | 0.119594  |
| Mo | -0.605908 | 0.038026  | -0.206581 |
| C  | -0.370064 | -0.630275 | -2.062628 |
| C  | -2.307861 | -0.980591 | 0.001626  |
| C  | -1.837491 | 1.462237  | -0.836504 |
| O  | -0.140036 | -1.048705 | -3.110600 |
| O  | -3.315113 | -1.532149 | 0.108170  |
| O  | -2.601884 | 2.245284  | -1.202361 |
| C  | 4.024235  | 0.716908  | -0.421222 |
| C  | 0.467461  | 3.201889  | 0.261062  |
| C  | -0.766626 | -0.343635 | 3.353256  |
| C  | 0.951397  | -3.096399 | -0.341467 |
| H  | 4.166384  | 1.569717  | 0.257696  |
| H  | 4.174771  | 1.099145  | -1.441074 |
| H  | 4.805663  | -0.022842 | -0.214572 |
| H  | 1.705429  | -3.787629 | 0.065301  |
| H  | 1.115200  | -3.044829 | -1.424437 |
| H  | -0.042089 | -3.524612 | -0.168133 |
| H  | -0.103412 | -0.692235 | 4.157137  |
| H  | -1.224907 | 0.596407  | 3.675843  |
| H  | -1.562294 | -1.088918 | 3.240559  |
| H  | 1.246293  | 3.821857  | 0.728662  |
| H  | 0.441421  | 3.454992  | -0.804148 |
| H  | -0.497278 | 3.477051  | 0.701569  |
| H  | 3.269484  | -1.784588 | 0.342803  |
| H  | -0.428326 | -2.220437 | 1.679605  |
| H  | -0.178527 | 1.876852  | 2.326927  |
| H  | 1.668239  | 1.662684  | -1.450646 |

el energy= -873.521605073

zpe= -873.248247

th energy= -873.227411

th enthalpy= -873.226467

free energy= -873.296868

TS-A

|    |           |           |           |
|----|-----------|-----------|-----------|
| C  | -2.667131 | 0.104261  | -0.466839 |
| C  | -1.518651 | -0.808129 | -0.742278 |
| C  | -1.012580 | -1.640017 | 0.312968  |
| C  | -0.557516 | -1.091934 | 1.538686  |
| C  | -0.226705 | 0.242424  | 1.998750  |
| C  | -0.311989 | 1.489439  | 1.321385  |
| C  | -0.991351 | 1.799640  | 0.108014  |
| C  | -2.391238 | 1.339490  | -0.072482 |
| Mo | 0.597421  | -0.022068 | -0.196067 |
| C  | 0.998218  | -0.956014 | -1.899193 |
| C  | 1.734481  | 1.414746  | -0.977389 |
| C  | 2.270188  | -0.813549 | 0.575031  |
| O  | 1.195303  | -1.534026 | -2.877959 |

|   |           |           |           |
|---|-----------|-----------|-----------|
| O | 2.401703  | 2.236764  | -1.434164 |
| O | 3.200891  | -1.283704 | 1.061794  |
| C | -4.044780 | -0.474572 | -0.602502 |
| C | -0.857534 | -3.126474 | 0.104319  |
| C | 0.470912  | 0.264724  | 3.343316  |
| C | -0.731771 | 3.169851  | -0.478191 |
| H | -4.186729 | -1.321090 | 0.084726  |
| H | -4.210777 | -0.862382 | -1.617725 |
| H | -4.819630 | 0.270734  | -0.390915 |
| H | -1.472279 | 3.891097  | -0.095896 |
| H | -0.832747 | 3.152174  | -1.569177 |
| H | 0.266186  | 3.549688  | -0.234822 |
| H | -0.274210 | 0.203956  | 4.148722  |
| H | 1.160699  | -0.577965 | 3.464365  |
| H | 1.036604  | 1.190843  | 3.485904  |
| H | -0.593440 | -3.340640 | -0.937331 |
| H | -0.086775 | -3.564089 | 0.748617  |
| H | -1.809991 | -3.636419 | 0.309999  |
| H | -3.176432 | 2.058075  | 0.182702  |
| H | 0.327110  | 2.263724  | 1.750932  |
| H | -0.169471 | -1.848855 | 2.221991  |
| H | -1.608294 | -1.337578 | -1.696206 |

el energy= -873.500378975

zpe= -873.227731

th energy= -873.207662

th enthalpy= -873.206718

free energy= -873.274824

TS-B

|    |           |           |           |
|----|-----------|-----------|-----------|
| C  | 0.036655  | 2.373919  | 1.242803  |
| C  | -0.040157 | 3.003574  | 0.000000  |
| C  | 0.036655  | 2.373919  | -1.242803 |
| C  | -0.251134 | 1.028558  | -1.605098 |
| C  | -1.379025 | 0.189008  | -1.275601 |
| C  | -1.954158 | -0.040506 | 0.000000  |
| C  | -1.379025 | 0.189008  | 1.275601  |
| C  | -0.251134 | 1.028558  | 1.605098  |
| Mo | 0.263842  | -0.741689 | 0.000000  |
| C  | 2.274794  | -0.606359 | 0.000000  |
| C  | 0.301634  | -2.227538 | 1.289929  |
| C  | 0.301634  | -2.227538 | -1.289929 |
| O  | 3.417713  | -0.485463 | 0.000000  |
| O  | 0.305400  | -3.124944 | 2.019476  |
| O  | 0.305400  | -3.124944 | -2.019476 |
| C  | 0.574549  | 3.209280  | 2.376549  |
| C  | 0.574549  | 3.209280  | -2.376549 |
| C  | -2.064999 | -0.469687 | -2.449663 |
| C  | -2.064999 | -0.469687 | 2.449663  |
| H  | 0.926885  | 4.191658  | 2.048151  |
| H  | 1.407578  | 2.686698  | 2.865394  |
| H  | -0.198329 | 3.352222  | 3.144975  |
| H  | -2.755975 | 0.241391  | 2.924935  |
| H  | -1.336562 | -0.777092 | 3.208007  |
| H  | -2.635111 | -1.354549 | 2.145747  |
| H  | -2.635111 | -1.354549 | -2.145747 |
| H  | -2.755975 | 0.241391  | -2.924935 |

H -1.336562 -0.777092 -3.208007  
H -0.198329 3.352222 -3.144975  
H 0.926885 4.191658 -2.048151  
H 1.407578 2.686698 -2.865394  
H 0.110597 0.798243 2.609166  
H -2.824246 -0.694817 0.000000  
H 0.110597 0.798243 -2.609166  
H 0.181593 4.068697 0.000000

el energy= -873.500002766

zpe= -873.227718

th energy= -873.207234

th enthalpy= -873.206290

free energy= -873.276518

#### TS-C

C -1.750179 -1.684788 0.247242  
C -0.475115 -1.636784 0.980690  
C 0.179648 -0.738722 1.840949  
C 0.163612 0.704345 1.839289  
C -0.473891 1.664862 1.042656  
C -1.775627 1.669633 0.362878  
C -2.654285 0.746508 -0.101376  
C -2.609915 -0.718160 -0.157226  
Mo 0.636775 -0.006826 -0.299198  
C 0.984755 -1.387751 -1.713054  
C 1.067095 1.507210 -1.538707  
C 2.513260 -0.067059 0.057245  
O 1.210003 -2.202121 -2.493668  
O 1.330580 2.405181 -2.208508  
O 3.650183 -0.103967 0.287870  
C -2.068626 -3.102911 -0.167759  
C 1.195123 -1.340929 2.788817  
C 0.053971 3.080366 1.209458  
C -3.911492 1.274526 -0.752775  
H -2.151561 -3.759123 0.710109  
H -1.260383 -3.509082 -0.793108  
H -3.001734 -3.167676 -0.735490  
H -4.801679 0.881143 -0.240884  
H -3.980292 0.943532 -1.798966  
H -3.963103 2.367428 -0.735674  
H -0.599655 3.651051 1.885286  
H 1.069013 3.093734 1.618103  
H 0.072160 3.609702 0.249448  
H 0.739405 -1.470872 3.780761  
H 1.532135 -2.324013 2.444590  
H 2.077254 -0.701929 2.907309  
H -3.464981 -1.110598 -0.707892  
H -2.075998 2.694731 0.143903  
H 0.970736 1.114386 2.445630  
H -0.062003 -2.640534 1.077672

el energy= -873.493675568

zpe= -873.219863

th energy= -873.199620

th enthalpy= -873.198675

free energy= -873.268243

#### TS-D

C -1.790483 -0.672096 -1.603979  
C -0.733340 -1.426487 -0.885317  
C -0.685410 -1.700455 0.480212  
C -1.566009 -1.078475 1.483578

C -1.867085 0.222367 1.684912  
C -1.380062 1.363269 0.878667  
C -1.539644 1.573401 -0.456611  
C -2.150406 0.607509 -1.386481  
Mo 0.798014 0.152837 -0.027410  
C 2.028103 -0.459992 -1.364147  
C 1.916438 1.781679 0.141301  
C 2.011780 -0.695826 1.184217  
O 2.751412 -0.837516 -2.191398  
O 2.589743 2.715466 0.226754  
O 2.727809 -1.218310 1.935323  
C -2.435730 -1.460873 -2.711025  
C -0.007102 -2.966705 0.950088  
C -2.695054 0.643237 2.869053  
C -1.203057 2.911597 -1.063763  
H -2.893144 -2.378866 -2.317325  
H -1.682547 -1.775344 -3.447190  
H -3.205692 -0.882473 -3.232533  
H -2.124294 3.394767 -1.421852  
H -0.543717 2.804574 -1.933745  
H -0.723522 3.578925 -0.340446  
H -3.600541 1.175372 2.545790  
H -2.996847 -0.215652 3.477679  
H -2.133652 1.337881 3.510420  
H -0.756421 -3.765933 1.063466  
H 0.743120 -3.304229 0.227558  
H 0.488377 -2.838115 1.918590  
H -2.907636 1.037861 -2.045898  
H -0.999664 2.203419 1.465498  
H -1.942482 -1.780234 2.232634  
H -0.207294 -2.141139 -1.521067

el energy= -873.488028007

zpe= -873.215518

th energy= -873.194981

th enthalpy= -873.194037

free energy= -873.264532

#### TS-E

C -0.276816 1.073282 1.685384  
C 0.077190 2.365380 1.230078  
C 0.069321 3.024518 0.000000  
C 0.077190 2.365380 -1.230078  
C -0.276816 1.073282 -1.685384  
C -1.374862 0.250517 -1.259008  
C -1.982129 -0.004734 0.000000  
C -1.374862 0.250517 1.259008  
Mo 0.236795 -0.712153 0.000000  
C 0.202242 -2.207898 1.276084  
C 0.202242 -2.207898 -1.276084  
C 2.271882 -0.642514 0.000000  
O 0.161534 -3.113982 1.992201  
O 0.161534 -3.113982 -1.992201  
O 3.416960 -0.583013 0.000000  
C 0.178579 0.763045 3.107486  
C 0.360567 4.507080 0.000000  
C 0.178579 0.763045 -3.107486  
C -3.253912 -0.819236 0.000000  
H -0.499579 1.207720 3.852501  
H 1.185094 1.151218 3.297815  
H 0.211397 -0.316381 3.292766  
H -4.131301 -0.157575 0.000000

H -3.321293 -1.458916 0.887293  
 H -3.321293 -1.458916 -0.887293  
 H -0.499579 1.207720 -3.852501  
 H 1.185094 1.151218 -3.297815  
 H 0.211397 -0.316381 -3.292766  
 H 0.932363 4.808362 0.887301  
 H 0.932363 4.808362 -0.887301  
 H -0.564465 5.100860 0.000000  
 H -1.844024 -0.301068 2.077351  
 H -1.844024 -0.301068 -2.077351  
 H 0.515937 2.975236 -2.028146  
 H 0.515937 2.975236 2.028146  
 el energy= -873.482256329  
 zpe= -873.211284  
 th energy= -873.190240  
 th enthalpy= -873.189296  
 free energy= -873.261034

#### TS-F

C 0.321311 1.298890 1.622812  
 C 0.032783 -0.002055 2.106298  
 C 0.318303 -1.302675 1.619791  
 C 1.505834 -1.744960 0.850737  
 C 1.921112 -1.244763 -0.322790  
 C 1.298188 -0.000869 -0.896375  
 C 1.921609 1.242399 -0.322388  
 C 1.507849 1.741255 0.852388  
 Mo -0.775017 0.000093 -0.094194  
 C -1.791373 1.646888 -0.501590  
 C -0.911915 0.003218 -2.054414

#### PBEPBE/auto/BS1

##### II

C -2.670790 0.155114 0.304182  
 C -1.531041 1.086675 0.562385  
 C -0.807379 1.758896 -0.455615  
 C -0.313272 1.148710 -1.681835  
 C -0.060822 -0.194870 -2.084560  
 C -0.292375 -1.440765 -1.359817  
 C -1.142574 -1.748307 -0.283187  
 C -2.469548 -1.113629 -0.084412  
 Mo 0.622541 0.037469 0.206101  
 C 0.426060 -0.615133 2.072606  
 C 2.312381 -0.999620 -0.018182  
 C 1.881605 1.451144 0.800430  
 O 0.219026 -1.035634 3.143915  
 O 3.329703 -1.567325 -0.135607  
 O 2.674983 2.241149 1.145865  
 C -4.045648 0.755437 0.481725  
 C -0.460978 3.228536 -0.272264  
 C 0.705874 -0.369857 -3.388376  
 C -1.006485 -3.123212 0.350297  
 H -4.196900 1.615032 -0.200530  
 H -4.177157 1.146661 1.510010  
 H -4.843260 0.016845 0.290150  
 H -1.811842 -3.795636 -0.009378  
 H -1.106422 -3.063464 1.448969  
 H -0.033243 -3.589462 0.119117  
 H 0.023671 -0.733913 -4.180989  
 H 1.158875 0.573423 -3.735758  
 H 1.510679 -1.118440 -3.281475  
 H -1.243493 3.855002 -0.745027

C -1.793437 -1.643902 -0.506524  
 O -2.459501 2.574764 -0.653985  
 O -0.945425 0.004829 -3.209763  
 O -2.463104 -2.570234 -0.661773  
 C -0.348329 2.447722 2.353652  
 C -0.353832 -2.451701 2.348016  
 C 3.027045 -1.883693 -1.111035  
 C 3.024984 1.883770 -1.112219  
 H -1.286771 2.142338 2.830825  
 H -0.569480 3.279903 1.675539  
 H 0.314557 2.838421 3.141258  
 H 3.419560 2.771675 -0.605054  
 H 2.661278 2.189597 -2.103994  
 H 3.859369 1.189510 -1.284512  
 H 3.861749 -1.188688 -1.278812  
 H 3.420393 -2.772764 -0.604950  
 H 2.666588 -2.187045 -2.104745  
 H 0.307653 -2.844961 3.135536  
 H -1.292226 -2.145633 2.824872  
 H -0.575805 -3.282247 1.668170  
 H 1.998549 2.636821 1.242715  
 H 1.443681 -0.000783 -1.982772  
 H 1.996603 -2.640315 1.241519  
 H -0.811515 -0.001754 2.806554  
 el energy= -873.446752008  
 zpe= -873.175165  
 th energy= -873.154805  
 th enthalpy= -873.153861  
 free energy= -873.223139

H -0.430449 3.491429 0.798692  
 H 0.510875 3.498588 -0.720376  
 H -3.330899 -1.773485 -0.279353  
 H 0.385252 -2.244999 -1.682301  
 H 0.151572 1.879417 -2.358200  
 H -1.653725 1.689077 1.476546  
 el energy= -873.518012298  
 zpe= -873.254164  
 th energy= -873.232606  
 th enthalpy= -873.231662  
 free energy= -873.303858

#### TS-A

C -2.691918 -0.080176 0.507711  
 C -1.526815 0.832775 0.757230  
 C -1.022362 1.655612 -0.320066  
 C -0.587471 1.086410 -1.556361  
 C -0.272596 -0.264863 -2.006918  
 C -0.353623 -1.511218 -1.303779  
 C -1.036533 -1.818449 -0.079978  
 C -2.431572 -1.334887 0.124187  
 Mo 0.613537 0.023697 0.192905  
 C 1.072193 0.995773 1.861904  
 C 1.747839 -1.404283 0.991950  
 C 2.287026 0.757794 -0.619673  
 O 1.315003 1.602767 2.833657  
 O 2.425143 -2.235512 1.462877  
 O 3.234067 1.207167 -1.137744  
 C -4.070432 0.515866 0.653621  
 C -0.852926 3.151349 -0.126678

|   |           |           |           |
|---|-----------|-----------|-----------|
| C | 0.403519  | -0.314241 | -3.371384 |
| C | -0.767039 | -3.185115 | 0.528888  |
| H | -4.215057 | 1.364112  | -0.044492 |
| H | -4.224207 | 0.920685  | 1.673378  |
| H | -4.861342 | -0.228553 | 0.456910  |
| H | -1.526287 | -3.915307 | 0.177346  |
| H | -0.843704 | -3.146095 | 1.629382  |
| H | 0.230902  | -3.576094 | 0.268342  |
| H | -0.362144 | -0.263928 | -4.169715 |
| H | 1.098822  | 0.529672  | -3.521888 |
| H | 0.966512  | -1.252142 | -3.510309 |
| H | -0.552976 | 3.373834  | 0.912285  |
| H | -0.095449 | 3.584668  | -0.802713 |
| H | -1.815760 | 3.669792  | -0.306526 |
| H | -3.235179 | -2.055542 | -0.103627 |
| H | 0.284475  | -2.299320 | -1.731315 |
| H | -0.203811 | 1.838200  | -2.260879 |
| H | -1.590779 | 1.371276  | 1.717553  |

el energy= -873.498902969

zpe= -873.235697

th energy= -873.214940

th enthalpy= -873.213996

free energy= -873.283689

#### TS-B

|    |           |           |           |
|----|-----------|-----------|-----------|
| C  | 0.054578  | 2.404544  | 1.253551  |
| C  | -0.012475 | 3.035259  | 0.000000  |
| C  | 0.054578  | 2.404544  | -1.253551 |
| C  | -0.241947 | 1.049032  | -1.614592 |
| C  | -1.384714 | 0.214095  | -1.286558 |
| C  | -1.963454 | -0.015327 | 0.000000  |
| C  | -1.384714 | 0.214095  | 1.286558  |
| C  | -0.241947 | 1.049032  | 1.614592  |
| Mo | 0.267728  | -0.761090 | 0.000000  |
| C  | 2.277479  | -0.655614 | 0.000000  |
| C  | 0.283271  | -2.251293 | 1.288161  |
| C  | 0.283271  | -2.251293 | -1.288161 |
| O  | 3.440135  | -0.549027 | 0.000000  |
| O  | 0.271215  | -3.162902 | 2.028135  |
| O  | 0.271215  | -3.162902 | -2.028135 |
| C  | 0.591538  | 3.243781  | 2.396636  |
| C  | 0.591538  | 3.243781  | -2.396636 |
| C  | -2.081347 | -0.440586 | -2.468188 |
| C  | -2.081347 | -0.440586 | 2.468188  |
| H  | 0.958403  | 4.229526  | 2.066665  |
| H  | 1.421201  | 2.713557  | 2.901933  |
| H  | -0.190252 | 3.399857  | 3.165958  |
| H  | -2.773035 | 0.281215  | 2.945788  |
| H  | -1.351153 | -0.753518 | 3.234258  |
| H  | -2.662527 | -1.328310 | 2.164275  |
| H  | -2.662527 | -1.328310 | -2.164275 |
| H  | -2.773035 | 0.281215  | -2.945788 |
| H  | -1.351153 | -0.753518 | -3.234258 |
| H  | -0.190252 | 3.399857  | -3.165958 |
| H  | 0.958403  | 4.229526  | -2.066665 |
| H  | 1.421201  | 2.713557  | -2.901933 |
| H  | 0.129594  | 0.808028  | 2.621941  |
| H  | -2.846649 | -0.666053 | 0.000000  |
| H  | 0.129594  | 0.808028  | -2.621941 |
| H  | 0.211229  | 4.109002  | 0.000000  |

el energy= -873.501856739

zpe= -873.238728

th energy= -873.217603

th enthalpy= -873.216659

free energy= -873.288396

#### TS-C

|    |           |           |           |
|----|-----------|-----------|-----------|
| C  | 1.752627  | -1.721366 | -0.228757 |
| C  | 0.486074  | -1.640187 | -0.985838 |
| C  | -0.144860 | -0.715530 | -1.854827 |
| C  | -0.105792 | 0.737890  | -1.830753 |
| C  | 0.557136  | 1.686725  | -1.020736 |
| C  | 1.847967  | 1.654696  | -0.315554 |
| C  | 2.718344  | 0.699095  | 0.143590  |
| C  | 2.643745  | -0.768059 | 0.186167  |
| Mo | -0.663638 | -0.002247 | 0.304282  |
| C  | -1.094621 | -1.402515 | 1.669877  |
| C  | -1.107921 | 1.510073  | 1.539401  |
| C  | -2.533577 | -0.021228 | -0.109220 |
| O  | -1.376512 | -2.243751 | 2.430854  |
| O  | -1.378548 | 2.423453  | 2.216898  |
| O  | -3.680055 | -0.034716 | -0.379070 |
| C  | 2.030832  | -3.153892 | 0.198114  |
| C  | -1.144747 | -1.293120 | -2.847230 |
| C  | 0.052088  | 3.121838  | -1.176305 |
| C  | 3.988478  | 1.204480  | 0.808597  |
| H  | 2.104201  | -3.825048 | -0.679948 |
| H  | 1.199047  | -3.537891 | 0.821693  |
| H  | 2.962454  | -3.242343 | 0.780655  |
| H  | 4.881833  | 0.801131  | 0.291636  |
| H  | 4.053661  | 0.856350  | 1.858370  |
| H  | 4.057976  | 2.304605  | 0.805702  |
| H  | 0.737353  | 3.698299  | -1.828800 |
| H  | -0.959018 | 3.160668  | -1.613521 |
| H  | 0.018618  | 3.638029  | -0.200310 |
| H  | -0.665283 | -1.389985 | -3.841224 |
| H  | -1.487078 | -2.296050 | -2.541731 |
| H  | -2.032846 | -0.648038 | -2.965749 |
| H  | 3.493133  | -1.188510 | 0.742108  |
| H  | 2.164840  | 2.677430  | -0.067889 |
| H  | -0.899988 | 1.174366  | -2.450360 |
| H  | 0.050167  | -2.641942 | -1.099078 |

el energy= -873.493614740

zpe= -873.229197

th energy= -873.208295

th enthalpy= -873.207351

free energy= -873.278505

#### TS-D

|    |           |           |           |
|----|-----------|-----------|-----------|
| C  | -1.788207 | -0.668946 | -1.634433 |
| C  | -0.730556 | -1.439623 | -0.919904 |
| C  | -0.680707 | -1.748267 | 0.453129  |
| C  | -1.540656 | -1.138877 | 1.486878  |
| C  | -1.846320 | 0.171535  | 1.718659  |
| C  | -1.393283 | 1.334915  | 0.916025  |
| C  | -1.568567 | 1.572481  | -0.428572 |
| C  | -2.159638 | 0.616853  | -1.388867 |
| Mo | 0.793490  | 0.151206  | -0.033370 |
| C  | 2.058319  | -0.423205 | -1.363759 |
| C  | 1.854802  | 1.818657  | 0.138138  |
| C  | 2.022367  | -0.672348 | 1.188811  |
| O  | 2.810679  | -0.778852 | -2.198906 |

|   |           |           |           |
|---|-----------|-----------|-----------|
| O | 2.490622  | 2.799836  | 0.221659  |
| O | 2.749005  | -1.193019 | 1.957527  |
| C | -2.410909 | -1.428646 | -2.785328 |
| C | 0.014301  | -3.028362 | 0.889868  |
| C | -2.630649 | 0.563853  | 2.952479  |
| C | -1.272825 | 2.946010  | -1.000833 |
| H | -2.883419 | -2.364388 | -2.429153 |
| H | -1.634828 | -1.729659 | -3.516156 |
| H | -3.171323 | -0.830329 | -3.315346 |
| H | -2.217322 | 3.421661  | -1.333826 |
| H | -0.619556 | 2.884357  | -1.889865 |
| H | -0.795224 | 3.607910  | -0.259410 |
| H | -3.563701 | 1.094219  | 2.679529  |
| H | -2.896062 | -0.314481 | 3.564835  |
| H | -2.047398 | 1.262197  | 3.584845  |
| H | -0.734263 | -3.838627 | 1.010725  |
| H | 0.753074  | -3.355239 | 0.139081  |
| H | 0.537425  | -2.913428 | 1.854966  |
| H | -2.906360 | 1.061957  | -2.064719 |
| H | -1.033662 | 2.184933  | 1.516962  |
| H | -1.881478 | -1.852187 | 2.254516  |
| H | -0.199769 | -2.149446 | -1.571425 |

el energy= -873.487677852

zpe= -873.224584

th energy= -873.203374

th enthalpy= -873.202430

free energy= -873.274605

TS-E

|    |           |           |           |
|----|-----------|-----------|-----------|
| C  | -0.247039 | 1.103834  | 1.694400  |
| C  | 0.103913  | 2.409998  | 1.240357  |
| C  | 0.095652  | 3.070945  | 0.000000  |
| C  | 0.103913  | 2.409998  | -1.240357 |
| C  | -0.247039 | 1.103834  | -1.694400 |
| C  | -1.363403 | 0.290912  | -1.268689 |
| C  | -1.981989 | 0.044454  | 0.000000  |
| C  | -1.363403 | 0.290912  | 1.268689  |
| Mo | 0.238860  | -0.739858 | 0.000000  |
| C  | 0.152694  | -2.235828 | 1.274510  |
| C  | 0.152694  | -2.235828 | -1.274510 |
| C  | 2.270108  | -0.734962 | 0.000000  |
| O  | 0.075712  | -3.152511 | 2.003312  |
| O  | 0.075712  | -3.152511 | -2.003312 |
| O  | 3.435055  | -0.710988 | 0.000000  |
| C  | 0.226765  | 0.781574  | 3.117363  |
| C  | 0.372645  | 4.564952  | 0.000000  |
| C  | 0.226765  | 0.781574  | -3.117363 |
| C  | -3.279840 | -0.744136 | 0.000000  |
| H  | -0.443959 | 1.230408  | 3.878674  |
| H  | 1.245072  | 1.166361  | 3.297448  |
| H  | 0.254457  | -0.306918 | 3.297592  |
| H  | -4.148683 | -0.057606 | 0.000000  |
| H  | -3.363620 | -1.386515 | 0.894104  |
| H  | -3.363620 | -1.386515 | -0.894104 |
| H  | -0.443959 | 1.230408  | -3.878674 |
| H  | 1.245072  | 1.166361  | -3.297448 |

|   |           |           |           |
|---|-----------|-----------|-----------|
| H | 0.254457  | -0.306918 | -3.297592 |
| H | 0.943999  | 4.875594  | 0.894316  |
| H | 0.943999  | 4.875594  | -0.894316 |
| H | -0.566267 | 5.152501  | 0.000000  |
| H | -1.841641 | -0.260446 | 2.093580  |
| H | -1.841641 | -0.260446 | -2.093580 |
| H | 0.533893  | 3.028424  | -2.048482 |
| H | 0.533893  | 3.028424  | 2.048482  |

el energy= -873.486221470

zpe= -873.224261

th energy= -873.202654

th enthalpy= -873.201710

free energy= -873.274699

TS-F

|    |           |           |           |
|----|-----------|-----------|-----------|
| C  | -0.329249 | 1.315456  | -1.642078 |
| C  | -0.023074 | 0.002164  | -2.115392 |
| C  | -0.327316 | -1.312421 | -1.644243 |
| C  | -1.510433 | -1.762222 | -0.866164 |
| C  | -1.941442 | -1.261349 | 0.318144  |
| C  | -1.351563 | -0.001664 | 0.900333  |
| C  | -1.943086 | 1.258315  | 0.320397  |
| C  | -1.512823 | 1.762076  | -0.862928 |
| Mo | 0.758383  | 0.000368  | 0.113088  |
| C  | 1.803483  | 1.634128  | 0.498585  |
| C  | 0.924462  | -0.001780 | 2.080860  |
| C  | 1.805702  | -1.632630 | 0.495688  |
| O  | 2.514220  | 2.557556  | 0.630844  |
| O  | 0.970283  | -0.003207 | 3.252861  |
| O  | 2.517646  | -2.555291 | 0.626571  |
| C  | 0.349816  | 2.468193  | -2.376873 |
| C  | 0.353372  | -2.462833 | -2.381249 |
| C  | -3.023116 | -1.940575 | 1.122046  |
| C  | -3.025913 | 1.934325  | 1.125472  |
| H  | 1.288248  | 2.152694  | -2.865126 |
| H  | 0.586388  | 3.302117  | -1.693259 |
| H  | -0.320365 | 2.870836  | -3.163982 |
| H  | -3.405302 | 2.838439  | 0.617842  |
| H  | -2.642590 | 2.234400  | 2.121106  |
| H  | -3.882958 | 1.257372  | 1.311125  |
| H  | -3.880883 | -1.265134 | 1.309820  |
| H  | -3.401632 | -2.843886 | 0.612332  |
| H  | -2.638923 | -2.242692 | 2.116732  |
| H  | -0.315573 | -2.863900 | -3.170218 |
| H  | 1.292183  | -2.145449 | -2.867554 |
| H  | 0.589690  | -3.298327 | -1.699483 |
| H  | -1.982891 | 2.687173  | -1.233505 |
| H  | -1.496063 | -0.002678 | 1.994712  |
| H  | -1.979137 | -2.687291 | -1.238556 |
| H  | 0.827602  | 0.003318  | -2.819483 |

el energy= -873.452042126

zpe= -873.189973

th energy= -873.168890

th enthalpy= -873.167945

free energy= -873.238889

**B3LYP/BS1**

II

|    |           |           |           |
|----|-----------|-----------|-----------|
| C  | 2.660489  | 0.216908  | -0.326334 |
| C  | 1.514236  | 1.154621  | -0.508769 |
| C  | 0.785395  | 1.745318  | 0.537367  |
| C  | 0.313917  | 1.074526  | 1.734773  |
| C  | 0.092982  | -0.278065 | 2.074297  |
| C  | 0.352128  | -1.486880 | 1.301891  |
| C  | 1.209560  | -1.752982 | 0.241630  |
| C  | 2.501051  | -1.061428 | 0.017470  |
| Mo | -0.647976 | 0.038678  | -0.216029 |
| C  | -0.461397 | -0.525909 | -2.124798 |
| C  | -2.312498 | -1.061398 | -0.004207 |
| C  | -1.929300 | 1.472327  | -0.733435 |
| O  | -0.264599 | -0.881715 | -3.206648 |
| O  | -3.292461 | -1.664297 | 0.117391  |
| O  | -2.714700 | 2.271785  | -1.025737 |
| C  | 4.022826  | 0.835567  | -0.538179 |
| C  | 0.412643  | 3.216096  | 0.433054  |
| C  | -0.639369 | -0.532174 | 3.384082  |
| C  | 1.117588  | -3.114759 | -0.424553 |
| H  | 4.193591  | 1.665758  | 0.162643  |
| H  | 4.108158  | 1.257571  | -1.550395 |
| H  | 4.826318  | 0.102090  | -0.405315 |
| H  | 1.950997  | -3.756168 | -0.098038 |
| H  | 1.194234  | -3.024623 | -1.515015 |
| H  | 0.177386  | -3.625692 | -0.189419 |
| H  | 0.064152  | -0.908855 | 4.140560  |
| H  | -1.105755 | 0.376149  | 3.778754  |
| H  | -1.421086 | -1.291103 | 3.261988  |
| H  | 1.177024  | 3.823870  | 0.940380  |
| H  | 0.380261  | 3.536192  | -0.613661 |
| H  | -0.557108 | 3.441513  | 0.890051  |
| H  | 3.380076  | -1.698940 | 0.146414  |
| H  | -0.307811 | -2.305881 | 1.589525  |
| H  | -0.139442 | 1.762011  | 2.448093  |
| H  | 1.626584  | 1.804821  | -1.379099 |

el energy= -874.457243362

zpe= -874.186011

th energy= -874.164869

th enthalpy= -874.163925

free energy= -874.235147

TS-A

|    |           |           |           |
|----|-----------|-----------|-----------|
| C  | -2.676022 | 0.074974  | -0.513618 |
| C  | -1.525966 | -0.861921 | -0.733515 |
| C  | -1.030774 | -1.656484 | 0.355945  |
| C  | -0.587526 | -1.080083 | 1.575184  |
| C  | -0.268271 | 0.266288  | 2.009469  |
| C  | -0.361738 | 1.506608  | 1.312167  |
| C  | -1.039942 | 1.823091  | 0.103585  |
| C  | -2.421774 | 1.322125  | -0.134461 |
| Mo | 0.630169  | -0.029458 | -0.209115 |
| C  | 1.068506  | -1.027920 | -1.881173 |
| C  | 1.735424  | 1.422443  | -1.029892 |
| C  | 2.323412  | -0.746537 | 0.619137  |
| O  | 1.283695  | -1.640371 | -2.839387 |
| O  | 2.373540  | 2.264644  | -1.502288 |
| O  | 3.258348  | -1.177487 | 1.142036  |
| C  | -4.059879 | -0.500342 | -0.691042 |
| C  | -0.877767 | -3.157509 | 0.189505  |

|   |           |           |           |
|---|-----------|-----------|-----------|
| C | 0.399855  | 0.326349  | 3.377330  |
| C | -0.787757 | 3.202798  | -0.481343 |
| H | -4.234836 | -1.334510 | 0.004465  |
| H | -4.191856 | -0.904794 | -1.705292 |
| H | -4.836907 | 0.253914  | -0.521178 |
| H | -1.546593 | 3.913390  | -0.114059 |
| H | -0.867571 | 3.185279  | -1.574293 |
| H | 0.199462  | 3.596446  | -0.218376 |
| H | -0.364987 | 0.291307  | 4.166531  |
| H | 1.082889  | -0.514676 | 3.540810  |
| H | 0.965098  | 1.254748  | 3.508034  |
| H | -0.600007 | -3.403942 | -0.841228 |
| H | -0.120354 | -3.581653 | 0.858348  |
| H | -1.836281 | -3.657100 | 0.395362  |
| H | -3.227347 | 2.035071  | 0.067336  |
| H | 0.272184  | 2.287445  | 1.735175  |
| H | -0.219158 | -1.820770 | 2.284867  |
| H | -1.604168 | -1.420491 | -1.670230 |

el energy= -874.434871656

zpe= -874.164517

th energy= -874.144120

th enthalpy= -874.143176

free energy= -874.212041

TS-B

|    |           |           |           |
|----|-----------|-----------|-----------|
| C  | 0.060556  | 2.389042  | 1.251635  |
| C  | 0.013399  | 3.012758  | 0.000000  |
| C  | 0.060556  | 2.389042  | -1.251635 |
| C  | -0.269789 | 1.053230  | -1.627741 |
| C  | -1.399609 | 0.221532  | -1.281100 |
| C  | -1.969212 | -0.008103 | 0.000000  |
| C  | -1.399609 | 0.221532  | 1.281100  |
| C  | -0.269789 | 1.053230  | 1.627741  |
| Mo | 0.270540  | -0.767288 | 0.000000  |
| C  | 2.296797  | -0.649232 | 0.000000  |
| C  | 0.291673  | -2.254448 | 1.312826  |
| C  | 0.291673  | -2.254448 | -1.312826 |
| O  | 3.444019  | -0.533458 | 0.000000  |
| O  | 0.287670  | -3.142963 | 2.058011  |
| O  | 0.287670  | -3.142963 | -2.058011 |
| C  | 0.609353  | 3.227285  | 2.390801  |
| C  | 0.609353  | 3.227285  | -2.390801 |
| C  | -2.111889 | -0.428334 | -2.456312 |
| C  | -2.111889 | -0.428334 | 2.456312  |
| H  | 0.999325  | 4.192403  | 2.053352  |
| H  | 1.417095  | 2.687336  | 2.903134  |
| H  | -0.171088 | 3.410305  | 3.143668  |
| H  | -2.798643 | 0.294601  | 2.921095  |
| H  | -1.398320 | -0.742733 | 3.225682  |
| H  | -2.692749 | -1.305324 | 2.149972  |
| H  | -2.692749 | -1.305324 | -2.149972 |
| H  | -2.798643 | 0.294601  | -2.921095 |
| H  | -1.398320 | -0.742733 | -3.225682 |
| H  | -0.171088 | 3.410305  | -3.143668 |
| H  | 0.999325  | 4.192403  | -2.053352 |
| H  | 1.417095  | 2.687336  | -2.903134 |
| H  | 0.074449  | 0.825071  | 2.637213  |
| H  | -2.850768 | -0.645449 | 0.000000  |
| H  | 0.074449  | 0.825071  | -2.637213 |
| H  | 0.263651  | 4.071090  | 0.000000  |

el energy= -874.440306836  
 zpe= -874.170197  
 th energy= -874.149419  
 th enthalpy= -874.148475  
 free energy= -874.219432

#### TS-C

|    |           |           |           |
|----|-----------|-----------|-----------|
| C  | -1.766297 | -1.708290 | 0.212161  |
| C  | -0.506545 | -1.638341 | 0.981476  |
| C  | 0.111208  | -0.724122 | 1.853154  |
| C  | 0.078012  | 0.724346  | 1.838790  |
| C  | -0.563669 | 1.676522  | 1.035942  |
| C  | -1.847068 | 1.655028  | 0.313686  |
| C  | -2.705291 | 0.713708  | -0.162074 |
| C  | -2.637272 | -0.754835 | -0.208953 |
| Mo | 0.688780  | -0.003276 | -0.304248 |
| C  | 1.108138  | -1.402096 | -1.697461 |
| C  | 1.128170  | 1.516165  | -1.558457 |
| C  | 2.564156  | -0.031098 | 0.143935  |
| O  | 1.360318  | -2.223372 | -2.468262 |
| O  | 1.377172  | 2.412790  | -2.241598 |
| O  | 3.691729  | -0.049630 | 0.430914  |
| C  | -2.064478 | -3.142220 | -0.196408 |
| C  | 1.085067  | -1.308487 | 2.867259  |
| C  | -0.068499 | 3.110598  | 1.222146  |
| C  | -3.967101 | 1.223449  | -0.839308 |
| H  | -2.163981 | -3.790298 | 0.686387  |
| H  | -1.239715 | -3.551097 | -0.798139 |
| H  | -2.984017 | -3.220265 | -0.784567 |
| H  | -4.860512 | 0.823142  | -0.337604 |
| H  | -4.018111 | 0.885033  | -1.884542 |
| H  | -4.032570 | 2.315825  | -0.830446 |
| H  | -0.756793 | 3.667173  | 1.875707  |
| H  | 0.931178  | 3.145393  | 1.665879  |
| H  | -0.030014 | 3.642409  | 0.264091  |
| H  | 0.586202  | -1.399827 | 3.843406  |
| H  | 1.423193  | -2.307252 | 2.572616  |
| H  | 1.968820  | -0.675334 | 3.004267  |
| H  | -3.479771 | -1.162095 | -0.766900 |
| H  | -2.159668 | 2.673633  | 0.085566  |
| H  | 0.853866  | 1.148253  | 2.473895  |
| H  | -0.091805 | -2.637379 | 1.105018  |

el energy= -874.435363396  
 zpe= -874.163648  
 th energy= -874.143171  
 th enthalpy= -874.142226  
 free energy= -874.212335

#### TS-D

|    |           |           |           |
|----|-----------|-----------|-----------|
| C  | -1.794308 | -0.614418 | -1.651709 |
| C  | -0.764862 | -1.412668 | -0.927769 |
| C  | -0.744623 | -1.732353 | 0.426940  |
| C  | -1.631576 | -1.129618 | 1.444061  |
| C  | -1.929072 | 0.167969  | 1.679544  |
| C  | -1.425954 | 1.336762  | 0.912603  |
| C  | -1.569615 | 1.598690  | -0.416867 |
| C  | -2.153093 | 0.662193  | -1.400438 |
| Mo | 0.849947  | 0.147340  | -0.009496 |
| C  | 2.074508  | -0.416053 | -1.396396 |
| C  | 1.955438  | 1.788646  | 0.219143  |
| C  | 2.057492  | -0.753315 | 1.197577  |

|   |           |           |           |
|---|-----------|-----------|-----------|
| O | 2.786228  | -0.757833 | -2.253148 |
| O | 2.601858  | 2.742279  | 0.341609  |
| O | 2.757655  | -1.306500 | 1.946833  |
| C | -2.414644 | -1.358994 | -2.814274 |
| C | -0.079226 | -3.024571 | 0.871243  |
| C | -2.779969 | 0.556930  | 2.869275  |
| C | -1.245815 | 2.974141  | -0.966452 |
| H | -2.899150 | -2.284214 | -2.471920 |
| H | -1.642048 | -1.657750 | -3.537401 |
| H | -3.158724 | -0.750461 | -3.339514 |
| H | -2.171670 | 3.460373  | -1.309450 |
| H | -0.579085 | 2.915729  | -1.835565 |
| H | -0.780841 | 3.616702  | -0.211838 |
| H | -3.679752 | 1.101654  | 2.549245  |
| H | -3.094232 | -0.319770 | 3.445811  |
| H | -2.228138 | 1.229731  | 3.542178  |
| H | -0.844236 | -3.808463 | 0.991665  |
| H | 0.648014  | -3.372977 | 0.130955  |
| H | 0.436478  | -2.918852 | 1.831873  |
| H | -2.884781 | 1.118808  | -2.070374 |
| H | -1.060022 | 2.156760  | 1.534894  |
| H | -2.023479 | -1.852351 | 2.163839  |
| H | -0.230103 | -2.106835 | -1.576821 |

el energy= -874.432515279  
 zpe= -874.161998  
 th energy= -874.141262  
 th enthalpy= -874.140318  
 free energy= -874.211174

#### TS-E

|    |           |           |           |
|----|-----------|-----------|-----------|
| C  | -0.282003 | 1.104591  | 1.705818  |
| C  | 0.102266  | 2.388332  | 1.238344  |
| C  | 0.117840  | 3.040424  | 0.000000  |
| C  | 0.102266  | 2.388332  | -1.238344 |
| C  | -0.282003 | 1.104591  | -1.705818 |
| C  | -1.379013 | 0.286515  | -1.263872 |
| C  | -1.986409 | 0.036453  | 0.000000  |
| C  | -1.379013 | 0.286515  | 1.263872  |
| Mo | 0.244294  | -0.745124 | 0.000000  |
| C  | 0.177970  | -2.240002 | 1.301282  |
| C  | 0.177970  | -2.240002 | -1.301282 |
| C  | 2.295411  | -0.712607 | 0.000000  |
| O  | 0.120721  | -3.133923 | 2.036178  |
| O  | 0.120721  | -3.133923 | -2.036178 |
| O  | 3.444938  | -0.668265 | 0.000000  |
| C  | 0.147352  | 0.806021  | 3.147851  |
| C  | 0.438432  | 4.526516  | 0.000000  |
| C  | 0.147352  | 0.806021  | -3.147851 |
| C  | -3.286860 | -0.748603 | 0.000000  |
| H  | -0.542788 | 1.263077  | 3.874930  |
| H  | 1.151244  | 1.193493  | 3.353654  |
| H  | 0.170254  | -0.270655 | 3.348060  |
| H  | -4.147902 | -0.064690 | 0.000000  |
| H  | -3.372520 | -1.386330 | 0.887513  |
| H  | -3.372520 | -1.386330 | -0.887513 |
| H  | -0.542788 | 1.263077  | -3.874930 |
| H  | 1.151244  | 1.193493  | -3.353654 |
| H  | 0.170254  | -0.270655 | -3.348060 |
| H  | 1.015995  | 4.817256  | 0.887320  |
| H  | 1.015995  | 4.817256  | -0.887320 |
| H  | -0.475344 | 5.138719  | 0.000000  |

H -1.860648 -0.259249 2.077671  
 H -1.860648 -0.259249 -2.077671  
 H 0.539727 2.998137 -2.035847  
 H 0.539727 2.998137 2.035847  
 el energy= -874.423497037  
 zpe= -874.154881  
 th energy= -874.133497  
 th enthalpy= -874.132553  
 free energy= -874.205149

TS-F

C 0.366678 1.305038 1.628255  
 C 0.075424 -0.000933 2.103917  
 C 0.366207 -1.306649 1.627338  
 C 1.540609 -1.752238 0.832182  
 C 1.940361 -1.252220 -0.349978  
 C 1.316211 0.000144 -0.918226  
 C 1.940807 1.251871 -0.349067  
 C 1.541287 1.750964 0.833551  
 Mo -0.794633 0.000160 -0.112442  
 C -1.827924 1.676363 -0.456878  
 C -0.970179 0.001097 -2.091859  
 C -1.828740 -1.675362 -0.458201  
 O -2.514464 2.601844 -0.557658  
 O -1.017377 0.001667 -3.248960  
 O -2.515753 -2.600425 -0.559590

C -0.282670 2.456055 2.390891  
 C -0.283385 -2.458064 2.389144  
 C 3.031686 -1.906248 -1.161610  
 C 3.032187 1.906299 -1.160291  
 H -1.208648 2.149820 2.891307  
 H -0.518645 3.296755 1.728431  
 H 0.403227 2.837004 3.164277  
 H 3.425107 2.799337 -0.660120  
 H 2.652925 2.207408 -2.148236  
 H 3.871944 1.220487 -1.343208  
 H 3.871408 -1.220313 -1.344223  
 H 3.424665 -2.799527 -0.661914  
 H 2.652377 -2.206863 -2.149689  
 H 0.402844 -2.840321 3.161590  
 H -1.208771 -2.151741 2.890597  
 H -0.520411 -3.297884 1.725936  
 H 2.031484 2.651317 1.212200  
 H 1.442315 0.000481 -2.005500  
 H 2.030566 -2.653049 1.210059  
 H -0.748414 -0.001018 2.825723  
 el energy= -874.386357438  
 zpe= -874.117063  
 th energy= -874.096420  
 th enthalpy= -874.095475  
 free energy= -874.165576



# Molecular Coordinates for (TMCOT)W(CO)<sub>3</sub> (Å)

## PBE0/BS1

II

|   |           |           |           |
|---|-----------|-----------|-----------|
| C | 0.903707  | 1.734886  | 0.435617  |
| C | 0.380669  | 1.171798  | 1.657244  |
| C | 0.096704  | -0.152948 | 2.089802  |
| C | 0.325141  | -1.410981 | 1.413434  |
| C | 1.152577  | -1.716497 | 0.320360  |
| C | 2.510225  | -1.140462 | 0.180581  |
| C | 2.745108  | 0.101171  | -0.231361 |
| C | 1.608861  | 1.007142  | -0.554720 |
| W | -0.499193 | 0.027035  | -0.171608 |
| C | -1.721209 | 1.452238  | -0.823359 |
| C | -0.270867 | -0.696502 | -2.009014 |
| C | -2.217779 | -0.951327 | 0.080384  |
| O | -2.475456 | 2.243008  | -1.199543 |
| O | -0.042156 | -1.147591 | -3.044847 |
| O | -3.233998 | -1.484039 | 0.217315  |
| C | 0.601792  | 3.198463  | 0.210318  |
| C | -0.715417 | -0.270191 | 3.362400  |
| C | 1.000708  | -3.093189 | -0.289188 |
| C | 4.117622  | 0.695193  | -0.359331 |
| H | 1.406685  | 3.809236  | 0.644341  |
| H | -0.346754 | 3.509641  | 0.662106  |
| H | 0.559027  | 3.422903  | -0.860809 |
| H | 4.235823  | 1.560525  | 0.308364  |
| H | 4.291441  | 1.061329  | -1.381364 |
| H | 4.899753  | -0.033927 | -0.119924 |
| H | 1.725849  | -3.792658 | 0.154246  |
| H | -0.007342 | -3.495570 | -0.138025 |
| H | 1.196578  | -3.067518 | -1.367679 |
| H | -0.062760 | -0.570873 | 4.193641  |
| H | -1.196420 | 0.674879  | 3.632879  |
| H | -1.496323 | -1.032729 | 3.265500  |
| H | 1.753414  | 1.579791  | -1.474904 |
| H | 3.333953  | -1.806719 | 0.452181  |
| H | -0.345228 | -2.200752 | 1.757691  |
| H | -0.101546 | 1.918103  | 2.288365  |

el energy= -873.819967054

zpe= -873.546548

th energy= -873.525835

th enthalpy= -873.524891

free energy= -873.595265

TS-A

|   |           |           |           |
|---|-----------|-----------|-----------|
| C | -2.751085 | 0.130965  | -0.460722 |
| C | -1.593652 | -0.768998 | -0.745046 |
| C | -1.109115 | -1.632576 | 0.302839  |
| C | -0.663756 | -1.100136 | 1.540911  |
| C | -0.328968 | 0.227700  | 2.024956  |
| C | -0.396112 | 1.482941  | 1.360081  |
| C | -1.055907 | 1.791187  | 0.126056  |
| C | -2.467434 | 1.357982  | -0.045380 |
| W | 0.494411  | -0.013695 | -0.158502 |
| C | 0.913658  | -0.902504 | -1.883053 |
| C | 1.683694  | 1.422623  | -0.865832 |
| C | 2.125478  | -0.882295 | 0.610415  |
| O | 1.122977  | -1.451385 | -2.877855 |
| O | 2.382462  | 2.241827  | -1.282138 |

|   |           |           |           |
|---|-----------|-----------|-----------|
| O | 3.036325  | -1.393994 | 1.097722  |
| C | -4.127688 | -0.444329 | -0.611761 |
| C | -0.979439 | -3.118894 | 0.082151  |
| C | 0.365388  | 0.222273  | 3.371657  |
| C | -0.785878 | 3.169205  | -0.441719 |
| H | -4.275606 | -1.300141 | 0.062609  |
| H | -4.288443 | -0.817568 | -1.633341 |
| H | -4.902924 | 0.298919  | -0.394445 |
| H | -1.507775 | 3.895742  | -0.034773 |
| H | -0.903825 | 3.170476  | -1.531090 |
| H | 0.221626  | 3.530731  | -0.209564 |
| H | -0.382013 | 0.138821  | 4.172654  |
| H | 1.059979  | -0.618892 | 3.474191  |
| H | 0.925807  | 1.147829  | 3.536214  |
| H | -1.942654 | -3.612983 | 0.276257  |
| H | -0.710646 | -3.327978 | -0.959239 |
| H | -0.221670 | -3.575713 | 0.728740  |
| H | -3.243731 | 2.080326  | 0.224558  |
| H | 0.229176  | 2.254238  | 1.814385  |
| H | -0.275290 | -1.866463 | 2.213355  |
| H | -1.677600 | -1.286370 | -1.706527 |

el energy= -873.802256715

zpe= -873.529467

th energy= -873.509501

th enthalpy= -873.508557

free energy= -873.576771

TS-B

|   |           |           |           |
|---|-----------|-----------|-----------|
| C | 0.039764  | 2.496184  | 1.236992  |
| C | -0.047133 | 3.133842  | 0.000000  |
| C | 0.039764  | 2.496184  | -1.236992 |
| C | -0.229136 | 1.136880  | -1.571489 |
| C | -1.395409 | 0.323638  | -1.272639 |
| C | -1.986525 | 0.115114  | 0.000000  |
| C | -1.395409 | 0.323638  | 1.272639  |
| C | -0.229136 | 1.136880  | 1.571489  |
| W | 0.208513  | -0.631433 | 0.000000  |
| C | 2.213073  | -0.540618 | 0.000000  |
| C | 0.212427  | -2.119327 | 1.288584  |
| C | 0.212427  | -2.119327 | -1.288584 |
| O | 3.360247  | -0.437454 | 0.000000  |
| O | 0.190409  | -3.012788 | 2.027149  |
| O | 0.190409  | -3.012788 | -2.027149 |
| C | 0.575138  | 3.319889  | 2.378364  |
| C | 0.575138  | 3.319889  | -2.378364 |
| C | -2.091736 | -0.297777 | -2.459879 |
| C | -2.091736 | -0.297777 | 2.459879  |
| H | 0.906884  | 4.314227  | 2.064620  |
| H | 1.422048  | 2.802132  | 2.848454  |
| H | -0.191383 | 3.434286  | 3.157881  |
| H | -2.756513 | 0.438783  | 2.933685  |
| H | -1.365791 | -0.621644 | 3.213757  |
| H | -2.690572 | -1.168350 | 2.169568  |
| H | -2.690572 | -1.168350 | -2.169568 |
| H | -2.756513 | 0.438783  | -2.933685 |
| H | -1.365791 | -0.621644 | -3.213757 |
| H | -0.191383 | 3.434286  | -3.157881 |

H 0.906884 4.314227 -2.064620  
H 1.422048 2.802132 -2.848454  
H 0.144903 0.893319 2.568443  
H -2.870645 -0.520348 0.000000  
H 0.144903 0.893319 -2.568443  
H 0.163948 4.201248 0.000000  
el energy= -873.797612222  
zpe= -873.525220  
th energy= -873.504828  
th enthalpy= -873.503884  
free energy= -873.574237

#### TS-C

C -1.871134 -1.676311 0.227647  
C -0.595221 -1.620821 0.965064  
C 0.023627 -0.736590 1.880538  
C 0.012484 0.700994 1.878657  
C -0.583717 1.648932 1.020671  
C -1.899246 1.664398 0.359667  
C -2.792822 0.748816 -0.088001  
C -2.742870 -0.714457 -0.160107  
W 0.562168 -0.007421 -0.225332  
C 0.918404 -1.360020 -1.659461  
C 1.007680 1.494735 -1.465503  
C 2.433108 -0.065912 0.173516  
O 1.132316 -2.161042 -2.459698  
O 1.265553 2.391591 -2.142778  
O 3.563487 -0.105119 0.446085  
C -2.162816 -3.090499 -0.217977  
C 0.997649 -1.356570 2.859155  
C -0.048760 3.064040 1.184349  
C -4.062710 1.282530 -0.708640  
H -2.237170 -3.766530 0.645470  
H -1.345371 -3.468395 -0.849019  
H -3.092272 -3.159035 -0.791268  
H -4.942340 0.886496 -0.180882  
H -4.154267 0.960012 -1.755769  
H -4.112485 2.375358 -0.681716  
H -0.694325 3.637076 1.865719  
H 0.969955 3.071346 1.584191  
H -0.033725 3.592290 0.223884  
H 0.490457 -1.536034 3.817657  
H 1.373080 -2.318277 2.494440  
H 1.858847 -0.706748 3.049632  
H -3.595586 -1.106811 -0.714568  
H -2.193325 2.692633 0.146136  
H 0.794770 1.116431 2.513342  
H -0.179432 -2.623674 1.060963  
el energy= -873.784791038  
zpe= -873.511046  
th energy= -873.490847  
th enthalpy= -873.489903  
free energy= -873.559773

#### TS-D

C -1.772949 -0.311127 -1.777747  
C -1.334114 -1.418840 -0.908376  
C -1.589429 -1.601074 0.423071  
C -2.370087 -0.666738 1.253780  
C -2.077822 0.622390 1.489369  
C -0.932205 1.356258 0.883785

C -0.820200 1.682393 -0.484837  
C -1.567561 1.013052 -1.554248  
W 0.653277 -0.102266 0.091134  
C 1.832187 -1.698463 0.011983  
C 1.782314 0.729229 -1.222263  
C 1.906973 0.649244 1.341752  
O 2.529431 -2.620923 -0.015401  
O 2.427370 1.246097 -2.041149  
O 2.635110 1.107121 2.127076  
C -2.397016 -0.774764 -3.066483  
C -1.233630 -2.907025 1.087921  
C -2.887617 1.437322 2.457578  
C -0.209840 3.007684 -0.877554  
H -3.319462 -1.340962 -2.876439  
H -1.718028 -1.449219 -3.607602  
H -2.637213 0.066916 -3.724243  
H -1.004761 3.758901 -1.006827  
H 0.349391 2.947155 -1.817870  
H 0.473279 3.367301 -0.101108  
H -3.297152 2.329305 1.963885  
H -3.715626 0.862669 2.886470  
H -2.253706 1.797658 3.280094  
H -2.156327 -3.447727 1.346727  
H -0.628178 -3.546875 0.437787  
H -0.689638 -2.745973 2.026543  
H -1.864004 1.677736 -2.369823  
H -0.499713 2.098093 1.558833  
H -3.206131 -1.121978 1.789558  
H -0.884583 -2.260901 -1.440468  
el energy= -873.775013738  
zpe= -873.502858  
th energy= -873.482294  
th enthalpy= -873.481350  
free energy= -873.552459

#### TS-E

C -0.262420 1.176704 1.656849  
C 0.076754 2.482802 1.224542  
C 0.063520 3.149365 0.000000  
C 0.076754 2.482802 -1.224542  
C -0.262420 1.176704 -1.656849  
C -1.397949 0.379720 -1.256070  
C -2.019537 0.144252 0.000000  
C -1.397949 0.379720 1.256070  
W 0.183503 -0.605599 0.000000  
C 0.132073 -2.100014 1.275055  
C 0.132073 -2.100014 -1.275055  
C 2.202406 -0.564394 0.000000  
O 0.077095 -3.001206 2.001205  
O 0.077095 -3.001206 -2.001205  
O 3.350428 -0.506262 0.000000  
C 0.207747 0.854759 3.072938  
C 0.347993 4.632417 0.000000  
C 0.207747 0.854759 -3.072938  
C -3.306674 -0.644702 0.000000  
H -0.435575 1.335651 3.826233  
H 1.234306 1.198749 3.239874  
H 0.195123 -0.223563 3.265256  
H -4.168776 0.036534 0.000000  
H -3.385986 -1.282562 0.887397  
H -3.385986 -1.282562 -0.887397

|   |           |           |           |
|---|-----------|-----------|-----------|
| H | -0.435575 | 1.335651  | -3.826233 |
| H | 1.234306  | 1.198749  | -3.239874 |
| H | 0.195123  | -0.223563 | -3.265256 |
| H | 0.918149  | 4.935783  | 0.887482  |
| H | 0.918149  | 4.935783  | -0.887482 |
| H | -0.580331 | 5.220662  | 0.000000  |
| H | -1.876058 | -0.150243 | 2.082981  |
| H | -1.876058 | -0.150243 | -2.082981 |
| H | 0.516166  | 3.084819  | -2.028243 |
| H | 0.516166  | 3.084819  | 2.028243  |

el energy= -873.778974693  
 zpe= -873.507541  
 th energy= -873.486716  
 th enthalpy= -873.485772  
 free energy= -873.557290

#### TS-F

|   |           |           |           |
|---|-----------|-----------|-----------|
| C | -0.470570 | -1.305851 | 1.610850  |
| C | -0.198439 | -0.000761 | 2.101198  |
| C | -0.471834 | 1.304366  | 1.611734  |
| C | -1.656343 | 1.749006  | 0.837455  |
| C | -2.054913 | 1.243644  | -0.339399 |
| C | -1.408162 | -0.000373 | -0.894509 |
| C | -2.054398 | -1.244793 | -0.339554 |
| C | -1.655257 | -1.750642 | 0.836872  |
| W | 0.649728  | 0.000005  | -0.063298 |
| C | 1.708995  | -1.610804 | -0.454969 |
| C | 0.838726  | 0.001434  | -2.029198 |
| C | 1.707768  | 1.612158  | -0.452754 |
| O | 2.378665  | -2.543756 | -0.595401 |
| O | 0.903186  | 0.002231  | -3.185059 |
| O | 2.376536  | 2.545927  | -0.591888 |
| C | 0.199121  | -2.450685 | 2.347956  |
| C | 0.196873  | 2.449286  | 2.349619  |
| C | -3.150998 | 1.873294  | -1.147120 |
| C | -3.151119 | -1.873874 | -1.146875 |
| H | 1.128886  | -2.138866 | 2.838120  |
| H | 0.437664  | -3.276906 | 1.668553  |
| H | -0.470122 | -2.849832 | 3.125475  |
| H | -3.558877 | -2.761174 | -0.649198 |
| H | -2.775682 | -2.178126 | -2.134624 |
| H | -3.977849 | -1.172834 | -1.327519 |
| H | -3.977739 | 1.172517  | -1.328717 |
| H | -3.558919 | 2.760432  | -0.649294 |
| H | -2.774807 | 2.177964  | -2.134453 |
| H | -0.473238 | 2.848074  | 3.126570  |
| H | 1.126245  | 2.137648  | 2.840639  |
| H | 0.435805  | 3.275740  | 1.670645  |
| H | -2.150520 | -2.644549 | 1.224604  |
| H | -1.529304 | -0.000380 | -1.983808 |

#### PBEPBE/auto/BS1

##### II

|   |           |           |           |
|---|-----------|-----------|-----------|
| C | 0.916790  | 1.751205  | 0.432822  |
| C | 0.409202  | 1.176757  | 1.669682  |
| C | 0.139818  | -0.160247 | 2.105291  |
| C | 0.359976  | -1.423537 | 1.410301  |
| C | 1.194819  | -1.739046 | 0.311944  |
| C | 2.548083  | -1.145533 | 0.145843  |
| C | 2.770511  | 0.111642  | -0.265299 |
| C | 1.621300  | 1.020707  | -0.571609 |
| W | -0.513545 | 0.029637  | -0.170787 |

|   |           |           |          |
|---|-----------|-----------|----------|
| H | -2.151758 | 2.642817  | 1.225189 |
| H | 0.646550  | -0.000548 | 2.802849 |

el energy= -873.746999809  
 zpe= -873.475227  
 th energy= -873.454966  
 th enthalpy= -873.454021  
 free energy= -873.523376

#### TS-G

|   |           |           |           |
|---|-----------|-----------|-----------|
| C | 1.332133  | -1.272614 | -0.923936 |
| C | 1.413934  | -0.000004 | -1.545468 |
| C | 1.332141  | 1.272607  | -0.923935 |
| C | 1.825664  | 1.759848  | 0.390409  |
| C | 1.422983  | 1.230776  | 1.555167  |
| C | 0.575034  | 0.000001  | 1.703745  |
| C | 1.422968  | -1.230783 | 1.555168  |
| C | 1.825644  | -1.759861 | 0.390410  |
| W | -0.556934 | 0.000002  | -0.250707 |
| C | -1.649738 | -1.580389 | -0.650533 |
| C | -2.004203 | 0.000010  | 1.094250  |
| C | -1.649726 | 1.580399  | -0.650537 |
| O | -2.281205 | -2.486346 | -0.996356 |
| O | -2.870754 | 0.000015  | 1.862907  |
| O | -2.281188 | 2.486359  | -0.996363 |
| H | 1.210065  | -2.085710 | -1.642394 |
| H | 1.210072  | 2.085705  | -1.642391 |
| H | 1.749765  | 1.699936  | 2.487592  |
| H | 1.749739  | -1.699950 | 2.487593  |
| C | 2.709280  | -2.972685 | 0.328686  |
| C | -0.080935 | 0.000005  | 3.080702  |
| C | 2.709322  | 2.972655  | 0.328680  |
| C | 1.200305  | -0.000007 | -3.051444 |
| H | 2.985412  | -3.319458 | 1.330590  |
| H | 2.209134  | -3.801596 | -0.192964 |
| H | 3.631371  | -2.758194 | -0.230250 |
| H | 0.662686  | 0.889658  | -3.397190 |
| H | 2.185612  | -0.000051 | -3.538353 |
| H | 0.662614  | -0.889633 | -3.397177 |
| H | 2.985457  | 3.319430  | 1.330583  |
| H | 3.631411  | 2.758143  | -0.230250 |
| H | 2.209194  | 3.801573  | -0.192977 |
| H | -0.704475 | -0.887371 | 3.234285  |
| H | 0.695859  | -0.000004 | 3.861638  |
| H | -0.704456 | 0.887394  | 3.234288  |

el energy= -873.742780949  
 zpe= -873.470843  
 th energy= -873.450690  
 th enthalpy= -873.449746  
 free energy= -873.518944

|   |           |           |           |
|---|-----------|-----------|-----------|
| C | -1.752410 | 1.453794  | -0.796623 |
| C | -0.328587 | -0.688460 | -2.016041 |
| C | -2.222881 | -0.964545 | 0.103813  |
| O | -2.528142 | 2.255739  | -1.159382 |
| O | -0.118988 | -1.148977 | -3.071661 |
| O | -3.247838 | -1.513727 | 0.257206  |
| C | 0.609570  | 3.224339  | 0.215827  |
| C | -0.651543 | -0.290357 | 3.400594  |
| C | 1.035064  | -3.120394 | -0.304850 |

|                           |           |           |           |
|---------------------------|-----------|-----------|-----------|
| C                         | 4.145971  | 0.715326  | -0.415757 |
| H                         | 1.420813  | 3.839686  | 0.653118  |
| H                         | -0.344706 | 3.534732  | 0.675733  |
| H                         | 0.562382  | 3.457274  | -0.861539 |
| H                         | 4.275794  | 1.586008  | 0.257002  |
| H                         | 4.302848  | 1.091525  | -1.446091 |
| H                         | 4.942035  | -0.015906 | -0.191908 |
| H                         | 1.795794  | -3.817443 | 0.101977  |
| H                         | 0.033704  | -3.542604 | -0.111721 |
| H                         | 1.184280  | -3.082983 | -1.398791 |
| H                         | 0.020424  | -0.611803 | 4.219834  |
| H                         | -1.122298 | 0.660997  | 3.698774  |
| H                         | -1.445658 | -1.051866 | 3.309107  |
| H                         | 1.750455  | 1.595156  | -1.503140 |
| H                         | 3.389557  | -1.814038 | 0.391263  |
| H                         | -0.311010 | -2.221235 | 1.761567  |
| H                         | -0.066418 | 1.925184  | 2.318139  |
| el energy= -873.824313113 |           |           |           |
| zpe= -873.560388          |           |           |           |
| th energy= -873.538969    |           |           |           |
| th enthalpy= -873.538025  |           |           |           |
| free energy= -873.610001  |           |           |           |

#### TS-A

|                           |           |           |           |
|---------------------------|-----------|-----------|-----------|
| C                         | -2.781697 | 0.123523  | -0.488088 |
| C                         | -1.610425 | -0.778678 | -0.757360 |
| C                         | -1.127864 | -1.641946 | 0.307251  |
| C                         | -0.691336 | -1.093512 | 1.554805  |
| C                         | -0.366796 | 0.249608  | 2.031402  |
| C                         | -0.425146 | 1.505374  | 1.340726  |
| C                         | -1.092745 | 1.814992  | 0.099189  |
| C                         | -2.505205 | 1.368868  | -0.084810 |
| W                         | 0.507766  | -0.018525 | -0.159121 |
| C                         | 0.964888  | -0.930164 | -1.865940 |
| C                         | 1.710418  | 1.409922  | -0.863525 |
| C                         | 2.134049  | -0.856247 | 0.646928  |
| O                         | 1.204736  | -1.498282 | -2.863251 |
| O                         | 2.429414  | 2.238289  | -1.277016 |
| O                         | 3.053132  | -1.360147 | 1.169443  |
| C                         | -4.161000 | -0.466571 | -0.640515 |
| C                         | -0.998100 | -3.139107 | 0.099230  |
| C                         | 0.311318  | 0.267215  | 3.396257  |
| C                         | -0.806476 | 3.187891  | -0.493173 |
| H                         | -4.309192 | -1.323615 | 0.046102  |
| H                         | -4.316672 | -0.857048 | -1.665656 |
| H                         | -4.949690 | 0.277534  | -0.433759 |
| H                         | -1.544349 | 3.927854  | -0.117391 |
| H                         | -0.900242 | 3.166554  | -1.592777 |
| H                         | 0.203203  | 3.555708  | -0.243638 |
| H                         | -0.454647 | 0.210658  | 4.193698  |
| H                         | 0.998600  | -0.585957 | 3.530167  |
| H                         | 0.884487  | 1.196498  | 3.550228  |
| H                         | -1.971374 | -3.634571 | 0.288241  |
| H                         | -0.717797 | -3.359715 | -0.945470 |
| H                         | -0.242626 | -3.596514 | 0.761766  |
| H                         | -3.293146 | 2.098839  | 0.165205  |
| H                         | 0.203185  | 2.287891  | 1.792372  |
| H                         | -0.308126 | -1.858476 | 2.245324  |
| H                         | -1.677845 | -1.300702 | -1.727117 |
| el energy= -873.807982496 |           |           |           |
| zpe= -873.544639          |           |           |           |

th energy= -873.523983  
th enthalpy= -873.523039  
free energy= -873.592805

#### TS-B

|                           |           |           |           |
|---------------------------|-----------|-----------|-----------|
| C                         | 0.055726  | 2.524995  | 1.248397  |
| C                         | -0.020363 | 3.163010  | 0.000000  |
| C                         | 0.055726  | 2.524995  | -1.248397 |
| C                         | -0.223863 | 1.156544  | -1.583810 |
| C                         | -1.403884 | 0.347929  | -1.283822 |
| C                         | -1.997822 | 0.137455  | 0.000000  |
| C                         | -1.403884 | 0.347929  | 1.283822  |
| C                         | -0.223863 | 1.156544  | 1.583810  |
| W                         | 0.210507  | -0.648118 | 0.000000  |
| C                         | 2.214003  | -0.573796 | 0.000000  |
| C                         | 0.200495  | -2.137832 | 1.292758  |
| C                         | 0.200495  | -2.137832 | -1.292758 |
| O                         | 3.379460  | -0.470683 | 0.000000  |
| O                         | 0.170943  | -3.041667 | 2.045472  |
| O                         | 0.170943  | -3.041667 | -2.045472 |
| C                         | 0.587976  | 3.353886  | 2.399315  |
| C                         | 0.587976  | 3.353886  | -2.399315 |
| C                         | -2.110856 | -0.270940 | -2.478126 |
| C                         | -2.110856 | -0.270940 | 2.478126  |
| H                         | 0.933317  | 4.352134  | 2.083859  |
| H                         | 1.431985  | 2.829781  | 2.887330  |
| H                         | -0.188718 | 3.480556  | 3.179143  |
| H                         | -2.784673 | 0.472908  | 2.947401  |
| H                         | -1.384008 | -0.590236 | 3.244759  |
| H                         | -2.711802 | -1.150603 | 2.188784  |
| H                         | -2.711802 | -1.150603 | -2.188784 |
| H                         | -2.784673 | 0.472908  | -2.947401 |
| H                         | -1.384008 | -0.590236 | -3.244759 |
| H                         | -0.188718 | 3.480556  | -3.179143 |
| H                         | 0.933317  | 4.352134  | -2.083859 |
| H                         | 1.431985  | 2.829781  | -2.887330 |
| H                         | 0.159571  | 0.902307  | 2.583949  |
| H                         | -2.894486 | -0.494994 | 0.000000  |
| H                         | 0.159571  | 0.902307  | -2.583949 |
| H                         | 0.192848  | 4.239160  | 0.000000  |
| el energy= -873.807253555 |           |           |           |
| zpe= -873.544100          |           |           |           |
| th energy= -873.523072    |           |           |           |
| th enthalpy= -873.522128  |           |           |           |
| free energy= -873.593888  |           |           |           |

#### TS-C

|   |           |           |           |
|---|-----------|-----------|-----------|
| C | -1.858226 | -1.719941 | 0.233959  |
| C | -0.586915 | -1.628936 | 0.988735  |
| C | 0.019288  | -0.715936 | 1.900305  |
| C | -0.018953 | 0.734287  | 1.875670  |
| C | -0.657599 | 1.670117  | 1.018870  |
| C | -1.964980 | 1.643783  | 0.336326  |
| C | -2.846348 | 0.692484  | -0.107593 |
| C | -2.762657 | -0.773592 | -0.165804 |
| W | 0.578974  | -0.002242 | -0.233598 |
| C | 0.995385  | -1.381975 | -1.620729 |
| C | 0.991535  | 1.502783  | -1.483608 |
| C | 2.451880  | -0.006463 | 0.189682  |
| O | 1.245943  | -2.216745 | -2.402689 |
| O | 1.219580  | 2.418487  | -2.177235 |

O 3.594765 -0.013717 0.484314  
 C -2.109995 -3.149254 -0.218692  
 C 0.997923 -1.305458 2.906534  
 C -0.149138 3.107114 1.166694  
 C -4.130984 1.199556 -0.741986  
 H -2.169228 -3.837562 0.647056  
 H -1.272378 -3.505529 -0.850828  
 H -3.040445 -3.243766 -0.802196  
 H -5.012590 0.793317 -0.207478  
 H -4.218952 0.856540 -1.791819  
 H -4.200910 2.299614 -0.732358  
 H -0.826879 3.684408 1.826128  
 H 0.867027 3.144531 1.592281  
 H -0.123986 3.620665 0.189191  
 H 0.488658 -1.443716 3.880547  
 H 1.369229 -2.291394 2.579818  
 H 1.869303 -0.648167 3.071707  
 H -3.610328 -1.196197 -0.722771  
 H -2.279959 2.668765 0.094970  
 H 0.759341 1.177907 2.510728  
 H -0.145563 -2.629143 1.095960  
 el energy= -873.793480660  
 zpe= -873.529099  
 th energy= -873.508251  
 th enthalpy= -873.507307  
 free energy= -873.578629

#### TS-D

C -2.413558 0.072179 -1.293600  
 C -1.451064 -1.016369 -0.913777  
 C -1.384739 -1.557721 0.398936  
 C -1.587115 -0.784759 1.604535  
 C -1.291746 0.554644 1.915445  
 C -0.712001 1.576074 1.061973  
 C -0.883862 1.812646 -0.331282  
 C -2.128501 1.357115 -1.022309  
 W 0.603452 -0.063599 -0.189145  
 C 1.598863 -1.516432 -1.074954  
 C 2.085137 1.052020 -0.799469  
 C 1.651020 -0.326805 1.436115  
 O 2.181325 -2.371241 -1.635518  
 O 2.961076 1.720242 -1.220401  
 O 2.215576 -0.489372 2.455849  
 C -3.681795 -0.381271 -1.973477  
 C -1.157323 -3.046910 0.584721  
 C -1.309467 0.928625 3.387163  
 C -0.294347 3.101339 -0.893773  
 H -4.260778 -1.066182 -1.323220  
 H -3.455276 -0.947138 -2.898942  
 H -4.328354 0.471844 -2.243043  
 H -1.046758 3.915995 -0.847291  
 H -0.006610 2.983444 -1.952666  
 H 0.598857 3.423876 -0.333059  
 H -1.875673 1.864008 3.551061  
 H -1.755458 0.136066 4.010522  
 H -0.278397 1.106279 3.750018  
 H -2.134441 -3.567054 0.655609  
 H -0.619068 -3.471104 -0.279574  
 H -0.582761 -3.275253 1.498396  
 H -2.836899 2.155183 -1.299446  
 H -0.109729 2.314820 1.611825

H -1.795634 -1.404278 2.489408  
 H -1.269295 -1.757440 -1.709837  
 el energy= -873.784889171  
 zpe= -873.522580  
 th energy= -873.501285  
 th enthalpy= -873.500341  
 free energy= -873.572972

#### TS-E

C -0.238419 1.207195 1.668463  
 C 0.102644 2.525327 1.235505  
 C 0.093684 3.192891 0.000000  
 C 0.102644 2.525327 -1.235505  
 C -0.238419 1.207195 -1.668463  
 C -1.391265 0.420214 -1.266035  
 C -2.023291 0.192519 0.000000  
 C -1.391265 0.420214 1.266035  
 W 0.181347 -0.627915 0.000000  
 C 0.094116 -2.121862 1.278927  
 C 0.094116 -2.121862 -1.278927  
 C 2.197217 -0.637246 0.000000  
 O 0.019750 -3.032546 2.019523  
 O 0.019750 -3.032546 -2.019523  
 O 3.364717 -0.601548 0.000000  
 C 0.244494 0.875269 3.087752  
 C 0.369029 4.686507 0.000000  
 C 0.244494 0.875269 -3.087752  
 C -3.334719 -0.573259 0.000000  
 H -0.386604 1.371293 3.853545  
 H 1.285723 1.205654 3.243775  
 H 0.215248 -0.210549 3.281481  
 H -4.189862 0.130219 0.000000  
 H -3.428944 -1.213897 0.894217  
 H -3.428944 -1.213897 -0.894217  
 H -0.386604 1.371293 -3.853545  
 H 1.285723 1.205654 -3.243775  
 H 0.215248 -0.210549 -3.281481  
 H 0.940021 4.997238 0.894357  
 H 0.940021 4.997238 -0.894357  
 H -0.570791 5.272258 0.000000  
 H -1.879535 -0.108331 2.099577  
 H -1.879535 -0.108331 -2.099577  
 H 0.532522 3.135691 -2.049940  
 H 0.532522 3.135691 2.049940  
 el energy= -873.790516382  
 zpe= -873.528248  
 th energy= -873.506825  
 th enthalpy= -873.505881  
 free energy= -873.578681

#### TS-F

C -0.469538 -1.318781 1.634770  
 C -0.175870 -0.000351 2.112025  
 C -0.469729 1.318288 1.635790  
 C -1.654063 1.768915 0.858092  
 C -2.072126 1.260019 -0.326809  
 C -1.455141 -0.000009 -0.892217  
 C -2.072946 -1.259703 -0.326731  
 C -1.654767 -1.768880 0.857940  
 W 0.638168 -0.000262 -0.082505  
 C 1.717417 -1.609670 -0.447960

|   |           |           |           |
|---|-----------|-----------|-----------|
| C | 0.842856  | 0.000881  | -2.059296 |
| C | 1.718095  | 1.609242  | -0.446292 |
| O | 2.423956  | -2.542495 | -0.561435 |
| O | 0.911601  | 0.001592  | -3.231415 |
| O | 2.424877  | 2.541937  | -0.558811 |
| C | 0.210692  | -2.466202 | 2.377157  |
| C | 0.210351  | 2.465341  | 2.378837  |
| C | -3.152603 | 1.922851  | -1.144512 |
| C | -3.155083 | -1.920870 | -1.143591 |
| H | 0.457310  | -3.298796 | 1.695510  |
| H | -0.462063 | -2.870729 | 3.160735  |
| H | 1.144578  | -2.144909 | 2.870689  |
| H | -3.548369 | -2.823075 | -0.643259 |
| H | -2.765736 | -2.221175 | -2.136721 |
| H | -4.003151 | -1.234308 | -1.334549 |
| H | -4.000067 | 1.236587  | -1.339026 |
| H | -3.547131 | 2.823868  | -0.643032 |
| H | -2.761001 | 2.225519  | -2.136053 |
| H | -0.462995 | 2.870104  | 3.161776  |
| H | 1.143579  | 2.143570  | 2.873266  |
| H | 0.457981  | 3.297896  | 1.697521  |
| H | -2.131141 | -2.689373 | 1.231531  |
| H | -1.582587 | 0.000050  | -1.988916 |
| H | -2.129793 | 2.689962  | 1.231107  |
| H | 0.677428  | -0.000522 | 2.814869  |

el energy= -873.759083233

zpe= -873.496980

th energy= -873.475949

th enthalpy= -873.475005

free energy= -873.546141

TS-G

|   |          |           |           |
|---|----------|-----------|-----------|
| C | 1.354734 | -1.284905 | -0.943913 |
| C | 1.423059 | -0.000056 | -1.567534 |
| C | 1.354736 | 1.284823  | -0.943950 |
| C | 1.810189 | 1.797300  | 0.377060  |

**B3LYP/BS1**

II

|   |           |           |           |
|---|-----------|-----------|-----------|
| C | 0.905245  | 1.741675  | 0.494467  |
| C | 0.412839  | 1.125812  | 1.708557  |
| C | 0.162346  | -0.217434 | 2.098423  |
| C | 0.406587  | -1.453837 | 1.374612  |
| C | 1.242419  | -1.743185 | 0.289739  |
| C | 2.570069  | -1.107988 | 0.094766  |
| C | 2.762085  | 0.153667  | -0.286765 |
| C | 1.609355  | 1.071804  | -0.535230 |
| W | -0.529349 | 0.030275  | -0.178119 |
| C | -1.781820 | 1.470070  | -0.748881 |
| C | -0.349813 | -0.628155 | -2.055162 |
| C | -2.220641 | -1.008456 | 0.090055  |
| O | -2.547946 | 2.279688  | -1.070713 |
| O | -0.151187 | -1.042016 | -3.117387 |
| O | -3.216568 | -1.580596 | 0.248174  |
| C | 0.584763  | 3.219044  | 0.334882  |
| C | -0.602894 | -0.400960 | 3.401800  |
| C | 1.118567  | -3.120513 | -0.341503 |
| C | 4.131515  | 0.763556  | -0.465423 |
| H | 1.384562  | 3.818297  | 0.795182  |
| H | -0.364646 | 3.500838  | 0.803422  |
| H | 0.536939  | 3.493346  | -0.724216 |
| H | 4.279267  | 1.612374  | 0.218234  |

|   |           |           |           |
|---|-----------|-----------|-----------|
| C | 1.426193  | 1.258780  | 1.562419  |
| C | 0.633291  | 0.000030  | 1.756296  |
| C | 1.426130  | -1.258752 | 1.562478  |
| C | 1.810130  | -1.797332 | 0.377141  |
| W | -0.544503 | 0.000003  | -0.229008 |
| C | -1.645146 | -1.562705 | -0.685857 |
| C | -2.007278 | 0.000016  | 1.115093  |
| C | -1.645081 | 1.562744  | -0.685848 |
| O | -2.293005 | -2.457283 | -1.089849 |
| O | -2.884439 | 0.000027  | 1.897561  |
| O | -2.292906 | 2.457358  | -1.089829 |
| H | 1.230640  | -2.098303 | -1.673424 |
| H | 1.230637  | 2.098186  | -1.673499 |
| H | 1.685089  | 1.798731  | 2.487381  |
| H | 1.684988  | -1.798698 | 2.487449  |
| C | 2.602714  | -3.082250 | 0.322330  |
| C | -0.023712 | 0.000083  | 3.141956  |
| C | 2.602812  | 3.082169  | 0.322176  |
| C | 1.247735  | -0.000077 | -3.087076 |
| H | 2.841734  | -3.457227 | 1.332356  |
| H | 2.042658  | -3.873555 | -0.214211 |
| H | 3.551483  | -2.938106 | -0.230847 |
| H | 0.712517  | 0.895213  | -3.446917 |
| H | 2.250747  | -0.000076 | -3.556920 |
| H | 0.712525  | -0.895379 | -3.446894 |
| H | 2.841865  | 3.457196  | 1.332177  |
| H | 3.551567  | 2.937979  | -0.231010 |
| H | 2.042778  | 3.873473  | -0.214391 |
| H | -0.652714 | -0.893052 | 3.293839  |
| H | 0.759156  | 0.000102  | 3.928064  |
| H | -0.652690 | 0.893247  | 3.293777  |

el energy= -873.755722199

zpe= -873.493412

th energy= -873.472448

th enthalpy= -873.471504

free energy= -873.542635

|   |           |           |           |
|---|-----------|-----------|-----------|
| H | 4.255315  | 1.157446  | -1.484960 |
| H | 4.927948  | 0.032895  | -0.282940 |
| H | 1.913371  | -3.785151 | 0.031592  |
| H | 0.150519  | -3.585639 | -0.124461 |
| H | 1.232999  | -3.065273 | -1.430824 |
| H | 0.084170  | -0.728026 | 4.195362  |
| H | -1.083539 | 0.525647  | 3.731348  |
| H | -1.378067 | -1.169504 | 3.303680  |
| H | 1.732628  | 1.683478  | -1.432030 |
| H | 3.424901  | -1.761231 | 0.290440  |
| H | -0.250458 | -2.260466 | 1.701463  |
| H | -0.052168 | 1.843408  | 2.382928  |

el energy= -874.751367540

zpe= -874.480216

th energy= -874.459127

th enthalpy= -874.458183

free energy= -874.529633

TS-A

|   |           |           |           |
|---|-----------|-----------|-----------|
| C | -2.762565 | 0.121687  | -0.501754 |
| C | -1.603407 | -0.801060 | -0.741425 |
| C | -1.136820 | -1.643856 | 0.335122  |
| C | -0.696301 | -1.095393 | 1.568583  |
| C | -0.367807 | 0.241967  | 2.037827  |

|   |           |           |           |
|---|-----------|-----------|-----------|
| C | -0.438534 | 1.493852  | 1.361399  |
| C | -1.089296 | 1.813597  | 0.126524  |
| C | -2.491618 | 1.357066  | -0.096046 |
| W | 0.518233  | -0.020595 | -0.167939 |
| C | 0.961213  | -0.952856 | -1.874799 |
| C | 1.690075  | 1.430195  | -0.895397 |
| C | 2.164018  | -0.843018 | 0.647252  |
| O | 1.180618  | -1.525399 | -2.858641 |
| O | 2.370818  | 2.267522  | -1.317609 |
| O | 3.076924  | -1.328939 | 1.165372  |
| C | -4.147223 | -0.445304 | -0.689300 |
| C | -1.025545 | -3.144527 | 0.144536  |
| C | 0.297851  | 0.259799  | 3.408269  |
| C | -0.818812 | 3.203376  | -0.432032 |
| H | -4.326971 | -1.291405 | -0.009551 |
| H | -4.281016 | -0.830091 | -1.711035 |
| H | -4.921356 | 0.308736  | -0.505646 |
| H | -1.548782 | 3.923738  | -0.027064 |
| H | -0.926852 | 3.213320  | -1.522600 |
| H | 0.184259  | 3.568099  | -0.187648 |
| H | -0.468586 | 0.190918  | 4.193399  |
| H | 0.987808  | -0.580628 | 3.543171  |
| H | 0.855618  | 1.187453  | 3.571220  |
| H | -1.999341 | -3.619468 | 0.336875  |
| H | -0.748471 | -3.381576 | -0.888499 |
| H | -0.284734 | -3.600886 | 0.811029  |
| H | -3.281075 | 2.079802  | 0.131356  |
| H | 0.179840  | 2.269053  | 1.816730  |
| H | -0.328691 | -1.852560 | 2.261099  |
| H | -1.679145 | -1.339088 | -1.690897 |

el energy= -874.732922814

zpe= -874.462400

th energy= -874.442146

th enthalpy= -874.441202

free energy= -874.510043

#### TS-B

|   |           |           |           |
|---|-----------|-----------|-----------|
| C | 0.060956  | 2.512547  | 1.245525  |
| C | 0.002167  | 3.144930  | 0.000000  |
| C | 0.060956  | 2.512547  | -1.245525 |
| C | -0.246846 | 1.160652  | -1.592827 |
| C | -1.415513 | 0.355224  | -1.277315 |
| C | -2.002468 | 0.147571  | 0.000000  |
| C | -1.415513 | 0.355224  | 1.277315  |
| C | -0.246846 | 1.160652  | 1.592827  |
| W | 0.212777  | -0.652460 | 0.000000  |
| C | 2.227856  | -0.571357 | 0.000000  |
| C | 0.205344  | -2.138209 | 1.309467  |
| C | 0.205344  | -2.138209 | -1.309467 |
| O | 3.378877  | -0.466184 | 0.000000  |
| O | 0.178795  | -3.022474 | 2.063987  |
| O | 0.178795  | -3.022474 | -2.063987 |
| C | 0.606701  | 3.339003  | 2.392489  |
| C | 0.606701  | 3.339003  | -2.392489 |
| C | -2.136328 | -0.256567 | -2.466605 |
| C | -2.136328 | -0.256567 | 2.466605  |
| H | 0.971176  | 4.319194  | 2.070061  |
| H | 1.432715  | 2.805712  | 2.882516  |
| H | -0.166666 | 3.488616  | 3.159877  |
| H | -2.789855 | 0.494184  | 2.935123  |
| H | -1.424382 | -0.593772 | 3.227790  |

|   |           |           |           |
|---|-----------|-----------|-----------|
| H | -2.752520 | -1.114070 | 2.173740  |
| H | -2.752520 | -1.114070 | -2.173740 |
| H | -2.789855 | 0.494184  | -2.935123 |
| H | -1.424382 | -0.593772 | -3.227790 |
| H | -0.166666 | 3.488616  | -3.159877 |
| H | 0.971176  | 4.319194  | -2.070061 |
| H | 1.432715  | 2.805712  | -2.882516 |
| H | 0.111876  | 0.918159  | 2.594357  |
| H | -2.898141 | -0.470089 | 0.000000  |
| H | 0.111876  | 0.918159  | -2.594357 |
| H | 0.239135  | 4.206453  | 0.000000  |

el energy= -874.734763768

zpe= -874.464468

th energy= -874.443807

th enthalpy= -874.442863

free energy= -874.513851

#### TS-C

|   |           |           |           |
|---|-----------|-----------|-----------|
| C | -1.888327 | -1.701927 | 0.189557  |
| C | -0.624036 | -1.623967 | 0.957358  |
| C | -0.044841 | -0.726169 | 1.887899  |
| C | -0.072903 | 0.716047  | 1.874472  |
| C | -0.672123 | 1.656119  | 1.009506  |
| C | -1.975601 | 1.646616  | 0.315114  |
| C | -2.850810 | 0.713051  | -0.141267 |
| C | -2.774365 | -0.753740 | -0.209157 |
| W | 0.603218  | -0.004419 | -0.227325 |
| C | 1.040191  | -1.375883 | -1.633644 |
| C | 1.039153  | 1.503495  | -1.484521 |
| C | 2.469812  | -0.015512 | 0.253753  |
| O | 1.289236  | -2.185558 | -2.420787 |
| O | 1.270104  | 2.399894  | -2.178145 |
| O | 3.590395  | -0.027896 | 0.578301  |
| C | -2.158693 | -3.131375 | -0.251310 |
| C | 0.886744  | -1.330629 | 2.928641  |
| C | -0.167384 | 3.089816  | 1.188899  |
| C | -4.131279 | 1.228133  | -0.777407 |
| H | -2.245229 | -3.801237 | 0.616457  |
| H | -1.326649 | -3.510010 | -0.862654 |
| H | -3.076537 | -3.213097 | -0.841679 |
| H | -5.010195 | 0.822794  | -0.254662 |
| H | -4.211863 | 0.900658  | -1.824313 |
| H | -4.196561 | 2.320390  | -0.755391 |
| H | -0.845723 | 3.650843  | 1.848827  |
| H | 0.837227  | 3.118470  | 1.621909  |
| H | -0.133460 | 3.618882  | 0.229365  |
| H | 0.339916  | -1.468414 | 3.872964  |
| H | 1.258211  | -2.311497 | 2.614286  |
| H | 1.750565  | -0.688155 | 3.132470  |
| H | -3.616492 | -1.160993 | -0.767878 |
| H | -2.284528 | 2.668956  | 0.098017  |
| H | 0.677340  | 1.145463  | 2.536522  |
| H | -0.205227 | -2.622024 | 1.075472  |

el energy= -874.724031045

zpe= -874.452307

th energy= -874.431922

th enthalpy= -874.430978

free energy= -874.501214

#### TS-D

|   |           |           |           |
|---|-----------|-----------|-----------|
| C | -1.959928 | -0.174092 | -1.718057 |
|---|-----------|-----------|-----------|

|   |           |           |           |
|---|-----------|-----------|-----------|
| C | -1.478126 | -1.327766 | -0.918823 |
| C | -1.672170 | -1.580617 | 0.411995  |
| C | -2.313429 | -0.646979 | 1.359093  |
| C | -1.960661 | 0.630285  | 1.612659  |
| C | -0.875083 | 1.391877  | 0.927201  |
| C | -0.828364 | 1.734510  | -0.438431 |
| C | -1.681627 | 1.130313  | -1.477755 |
| W | 0.693294  | -0.113965 | 0.039563  |
| C | 1.780446  | -1.775566 | -0.143241 |
| C | 1.867146  | 0.750018  | -1.230380 |
| C | 1.963223  | 0.507532  | 1.361853  |
| O | 2.405576  | -2.749282 | -0.234741 |
| O | 2.533701  | 1.286299  | -2.024871 |
| O | 2.693508  | 0.883603  | 2.192253  |
| C | -2.741549 | -0.580455 | -2.948145 |
| C | -1.364310 | -2.953250 | 0.977977  |
| C | -2.632044 | 1.399426  | 2.727677  |
| C | -0.191825 | 3.054224  | -0.842905 |
| H | -3.656894 | -1.124397 | -2.674014 |
| H | -2.150607 | -1.257840 | -3.582106 |
| H | -3.024847 | 0.289361  | -3.550477 |
| H | -0.972202 | 3.825338  | -0.946560 |
| H | 0.335710  | 2.985465  | -1.800713 |
| H | 0.522716  | 3.396160  | -0.087325 |
| H | -3.089289 | 2.321897  | 2.342958  |
| H | -3.407295 | 0.806959  | 3.225769  |
| H | -1.893859 | 1.706282  | 3.482508  |
| H | -2.305201 | -3.447694 | 1.263773  |
| H | -0.848941 | -3.590075 | 0.252015  |
| H | -0.752396 | -2.889489 | 1.885838  |
| H | -2.036287 | 1.841996  | -2.227115 |
| H | -0.382765 | 2.105215  | 1.589464  |
| H | -3.080152 | -1.100867 | 1.990187  |
| H | -1.093912 | -2.156606 | -1.517278 |

el energy= -874.716840926

zpe= -874.446552

th energy= -874.425843

th enthalpy= -874.424899

free energy= -874.496189

#### TS-E

|   |           |           |           |
|---|-----------|-----------|-----------|
| C | -0.268465 | 1.209032  | 1.678362  |
| C | 0.099769  | 2.507335  | 1.232973  |
| C | 0.108745  | 3.166859  | 0.000000  |
| C | 0.099769  | 2.507335  | -1.232973 |
| C | -0.268465 | 1.209032  | -1.678362 |
| C | -1.402000 | 0.415982  | -1.260573 |
| C | -2.024678 | 0.186874  | 0.000000  |
| C | -1.402000 | 0.415982  | 1.260573  |
| W | 0.188973  | -0.632015 | 0.000000  |
| C | 0.109837  | -2.121987 | 1.297987  |
| C | 0.109837  | -2.121987 | -1.297987 |
| C | 2.219062  | -0.621961 | 0.000000  |
| O | 0.040121  | -3.010795 | 2.043054  |
| O | 0.040121  | -3.010795 | -2.043054 |
| O | 3.371645  | -0.574553 | 0.000000  |
| C | 0.178484  | 0.896514  | 3.113371  |
| C | 0.419718  | 4.654111  | 0.000000  |
| C | 0.178484  | 0.896514  | -3.113371 |
| C | -3.339916 | -0.571875 | 0.000000  |
| H | -0.480842 | 1.381107  | 3.851018  |

|   |           |           |           |
|---|-----------|-----------|-----------|
| H | 1.199823  | 1.247498  | 3.297887  |
| H | 0.165453  | -0.179645 | 3.315630  |
| H | -4.184921 | 0.131517  | 0.000000  |
| H | -3.437878 | -1.207354 | 0.887647  |
| H | -3.437878 | -1.207354 | -0.887647 |
| H | -0.480842 | 1.381107  | -3.851018 |
| H | 1.199823  | 1.247498  | -3.297887 |
| H | 0.165453  | -0.179645 | -3.315630 |
| H | 0.995126  | 4.948076  | 0.887527  |
| H | 0.995126  | 4.948076  | -0.887527 |
| H | -0.498556 | 5.259192  | 0.000000  |
| H | -1.892045 | -0.108889 | 2.082697  |
| H | -1.892045 | -0.108889 | -2.082697 |
| H | 0.538001  | 3.109688  | -2.035801 |
| H | 0.538001  | 3.109688  | 2.035801  |

el energy= -874.717102870

zpe= -874.447974

th energy= -874.426834

th enthalpy= -874.425889

free energy= -874.498107

#### TS-F

|   |           |           |           |
|---|-----------|-----------|-----------|
| C | 0.530102  | 1.309985  | 1.622744  |
| C | 0.240007  | 0.003098  | 2.101642  |
| C | 0.500410  | -1.309777 | 1.614689  |
| C | 1.679976  | -1.765205 | 0.828608  |
| C | 2.072333  | -1.264805 | -0.354645 |
| C | 1.426360  | -0.013268 | -0.913045 |
| C | 2.077270  | 1.240608  | -0.370012 |
| C | 1.698655  | 1.750647  | 0.814971  |
| W | -0.665436 | -0.001586 | -0.076512 |
| C | -1.737185 | 1.637365  | -0.398325 |
| C | -0.883953 | 0.016967  | -2.057176 |
| C | -1.744999 | -1.627218 | -0.423525 |
| O | -2.417414 | 2.573297  | -0.483990 |
| O | -0.960015 | 0.024560  | -3.214821 |
| O | -2.432476 | -2.556965 | -0.522905 |
| C | -0.107678 | 2.463661  | 2.391059  |
| C | -0.158305 | -2.451917 | 2.383293  |
| C | 3.168143  | -1.903335 | -1.170947 |
| C | 3.154181  | 1.883183  | -1.208012 |
| H | -1.022169 | 2.157797  | 2.912543  |
| H | -0.361533 | 3.297334  | 1.726352  |
| H | 0.592262  | 2.852704  | 3.147151  |
| H | 3.565533  | 2.774854  | -0.720433 |
| H | 2.753770  | 2.184101  | -2.187540 |
| H | 3.983692  | 1.190152  | -1.408480 |
| H | 4.000321  | -1.208192 | -1.352787 |
| H | 3.571383  | -2.793958 | -0.674669 |
| H | 2.789995  | -2.205168 | -2.158943 |
| H | 0.528409  | -2.845369 | 3.149307  |
| H | -1.075004 | -2.132769 | 2.893170  |
| H | -0.415368 | -3.285832 | 1.720156  |
| H | 2.194891  | 2.651960  | 1.182503  |
| H | 1.531464  | -0.019977 | -2.002537 |
| H | 2.175343  | -2.658849 | 1.216109  |
| H | -0.583404 | 0.011491  | 2.825805  |

el energy= -874.684131689

zpe= -874.414575

th energy= -874.394062

th enthalpy= -874.393118



free energy= -874.463380

TS-G

|   |           |           |           |
|---|-----------|-----------|-----------|
| C | 1.339820  | -1.276830 | -0.942752 |
| C | 1.409193  | 0.000064  | -1.563482 |
| C | 1.339860  | 1.276922  | -0.942712 |
| C | 1.845535  | 1.773706  | 0.368865  |
| C | 1.470503  | 1.242325  | 1.544886  |
| C | 0.637879  | -0.000041 | 1.720998  |
| C | 1.470599  | -1.242340 | 1.544824  |
| C | 1.845625  | -1.773647 | 0.368771  |
| W | -0.583402 | -0.000023 | -0.235001 |
| C | -1.668217 | -1.598034 | -0.663602 |
| C | -2.015538 | 0.000020  | 1.150332  |
| C | -1.668247 | 1.597969  | -0.663679 |
| O | -2.289090 | -2.503025 | -1.041086 |
| O | -2.862772 | 0.000035  | 1.943977  |
| O | -2.289125 | 2.502934  | -1.041194 |
| H | 1.218158  | -2.087464 | -1.662560 |
| H | 1.218201  | 2.087586  | -1.662484 |
| H | 1.799782  | 1.726375  | 2.468290  |
| H | 1.799980  | -1.726364 | 2.468206  |
| C | 2.711646  | -3.008441 | 0.293473  |
| C | 0.003759  | -0.000103 | 3.117098  |
| C | 2.711416  | 3.008604  | 0.293665  |
| C | 1.215695  | 0.000084  | -3.080843 |
| H | 2.992682  | -3.363610 | 1.291384  |
| H | 2.191911  | -3.827633 | -0.225374 |
| H | 3.632329  | -2.809804 | -0.274655 |
| H | 0.682816  | 0.889574  | -3.434201 |
| H | 2.207642  | -0.000051 | -3.555175 |
| H | 0.682591  | -0.889277 | -3.434192 |
| H | 2.992338  | 3.363779  | 1.291606  |
| H | 3.632164  | 2.810092  | -0.274400 |
| H | 2.191625  | 3.827749  | -0.225197 |
| H | -0.616946 | -0.887050 | 3.282670  |
| H | 0.794183  | -0.000119 | 3.884812  |
| H | -0.616978 | 0.886806  | 3.282741  |

el energy= -874.680149928

zpe= -874.410540

th energy= -874.390095

th enthalpy= -874.389151

free energy= -874.459206

## References

- (1) Cotton, F. A.; Faller, J. W.; Musco, A. Stereochemically Nonrigid Organometallic Compounds. II. 1,3,5,7-Tetramethylcyclo-Octatetraenemolybdenum Tricarbonyl. *J. Am. Chem. Soc.* **1966**, 88 (19), 4506–4507. <https://doi.org/10.1021/ja00971a037>.
- (2) Bennett, M. J.; Cotton, F. A.; Takats, J. Stereochemically Nonrigid Organometallic Molecules. XI. Molecular Structure of (1,3,5,7-Tetramethylcyclooctatetraene)Chromium Tricarbonyl. *J. Am. Chem. Soc.* **1968**, 90 (4), 903–909. <https://doi.org/10.1021/ja01006a011>.
